# Supplementary material
Source: publisher site journal article supplement (https://cdn.jamanetwork.com/ama/content_public/journal/psych/933641/yoi140115supp2_prod.xlsx)
Supplement: Supplementary file 1 [file yoi140115supp2_prod.xlsx]

## Sheet: Discovery DE genes
Differentially expressed (DE) genes in the discovery toddlers
Description of the problem:
Number of classes: 2
Number of genes that passed filtering criteria: 12202
Type of univariate test used: Two-sample T-test
Class variable : Dx_New
Permutation p-values for significant genes were computed based on 10000 random permutations
Nominal significance level of each univariate test: 0.05
Genes which are differentially expressed among classes:
Number of genes significant at 0.05 level of the univariate test: 3052
Table 1 - Sorted by p-value of the univariate test.
Class 1: ASD; Class 2: Control. The first 3052 genes are significant at the nominal 0.05 level of the univariate test
	Parametric p-value	FDR	Permutation p-value	Geom mean of intensities in class 1	Geom mean of intensities in class 2	Fold-change	UniqueID	Symbol
1	< 1e-07	< 1e-07	< 1e-07	104.08	85.31	1.22	ILMN_2210934	NR3C2
2	< 1e-07	< 1e-07	< 1e-07	1629.96	1360.64	1.2	ILMN_1770892	YY1
3	1e-07	0.000122	< 1e-07	277.42	341.16	0.81	ILMN_3280402	LOC100132510
4	1e-07	0.000122	< 1e-07	141.8	177.97	0.8	ILMN_1656898	LOC653324
5	1e-07	0.000122	< 1e-07	139.99	124.1	1.13	ILMN_1807031	C14orf28
6	1e-07	0.000122	< 1e-07	97.74	85.32	1.15	ILMN_1799082	ZNF609
7	1e-07	0.000122	< 1e-07	92.42	113.3	0.82	ILMN_2112730	SLC9A4
8	1e-07	0.000122	< 1e-07	153.21	133.7	1.15	ILMN_3244521	LOC283267
9	1e-07	0.000122	< 1e-07	146.83	187.51	0.78	ILMN_2170625	LOC389286
10	1e-07	0.000122	< 1e-07	125.95	110.49	1.14	ILMN_1813573	SETD1B
11	2e-07	0.000222	< 1e-07	132.81	162.67	0.82	ILMN_3219808	LOC391670
12	3e-07	0.000261	< 1e-07	995.99	880.89	1.13	ILMN_1735360	SDAD1
13	3e-07	0.000261	< 1e-07	233.3	200.87	1.16	ILMN_1662328	CNNM3
14	3e-07	0.000261	< 1e-07	139.1	168.71	0.82	ILMN_1676938	LOC649214
15	4e-07	0.000287	< 1e-07	10307.1	9079.11	1.14	ILMN_3194217	LOC100129424
16	4e-07	0.000287	< 1e-07	344.77	303.23	1.14	ILMN_1738229	NDRG3
17	4e-07	0.000287	< 1e-07	160.04	141.32	1.13	ILMN_1666482	SP2
18	5e-07	0.000339	< 1e-07	65.25	76.74	0.85	ILMN_3242196	LOC100132728
19	6e-07	0.000385	< 1e-07	91.85	80.27	1.14	ILMN_1668194	LMTK3
20	7e-07	0.000388	< 1e-07	67.7	77.18	0.88	ILMN_3206111	LOC399881
21	7e-07	0.000388	< 1e-07	97.82	86.66	1.13	ILMN_3236367	IFFO2
22	7e-07	0.000388	< 1e-07	2122.09	2468.3	0.86	ILMN_3261938	LOC100130154
23	1.1e-06	0.000584	< 1e-07	83.05	94.64	0.88	ILMN_3185563	BRD7P2
24	1.2e-06	0.00061	< 1e-07	216.08	248.83	0.87	ILMN_3199755	LOC646821
25	1.5e-06	0.000651	< 1e-07	75.37	64.12	1.18	ILMN_1671142	GPR68
26	1.5e-06	0.000651	< 1e-07	55.71	70.99	0.78	ILMN_3192419	LOC100128485
27	1.5e-06	0.000651	< 1e-07	161.69	138.25	1.17	ILMN_2250923	FOXP1
28	1.5e-06	0.000651	< 1e-07	106.53	125.75	0.85	ILMN_3256184	LOC100128498
29	1.6e-06	0.000651	< 1e-07	581.44	448.71	1.3	ILMN_1841334
30	1.6e-06	0.000651	< 1e-07	92.03	73.83	1.25	ILMN_1673769	KCNG1
31	1.8e-06	0.000686	< 1e-07	181.83	160.17	1.14	ILMN_1689059	ZNF329
32	1.8e-06	0.000686	< 1e-07	66.43	75.14	0.88	ILMN_3183789	LOC100128525
33	2.1e-06	0.000754	< 1e-07	2145	1907.41	1.12	ILMN_1778242	CALM1
34	2.1e-06	0.000754	< 1e-07	56.1	50.59	1.11	ILMN_1713384	LOC654096
35	2.3e-06	0.000802	< 1e-07	54.24	61.36	0.88	ILMN_3240773	LOC100129445
36	2.4e-06	0.000813	< 1e-07	167.96	193.31	0.87	ILMN_2415949	MRRF
37	2.6e-06	0.000835	< 1e-07	125.13	111.78	1.12	ILMN_1688853	ZBTB9
38	2.6e-06	0.000835	< 1e-07	64.6	72.51	0.89	ILMN_3242428	LOC100134624
39	2.8e-06	0.000876	< 1e-07	242.27	309.37	0.78	ILMN_3236904	LOC648740
40	3e-06	0.000901	< 1e-07	95.39	108.57	0.88	ILMN_2352926	BPGM
41	3.1e-06	0.000901	< 1e-07	266.21	235.44	1.13	ILMN_1778173	AK3
42	3.1e-06	0.000901	< 1e-07	61.6	68.1	0.9	ILMN_1672320	LOC441907
43	3.3e-06	0.000936	< 1e-07	878	774.68	1.13	ILMN_1779401	CHP
44	3.5e-06	0.000949	< 1e-07	962.78	868.57	1.11	ILMN_1776216	MMGT1
45	3.5e-06	0.000949	< 1e-07	85.27	96.75	0.88	ILMN_3246845	LOC100133770
46	3.7e-06	0.000952	< 1e-07	595.79	811.94	0.73	ILMN_3216979	LOC646949
47	3.9e-06	0.000952	< 1e-07	88.02	77.67	1.13	ILMN_1652918	RHOF
48	3.9e-06	0.000952	< 1e-07	66.23	76.83	0.86	ILMN_3204898	LOC644101
49	3.9e-06	0.000952	< 1e-07	181.73	163.56	1.11	ILMN_2080751	ADNP2
50	3.9e-06	0.000952	< 1e-07	121.92	110.19	1.11	ILMN_2232520	ANKRD28
51	4.1e-06	0.000981	0.0001	63.05	71.78	0.88	ILMN_3287986	LOC400061
52	4.3e-06	0.000994	< 1e-07	111.06	130.52	0.85	ILMN_2213680	ZCCHC10
53	4.4e-06	0.000994	< 1e-07	87.04	102.23	0.85	ILMN_3202373	LOC392288
54	4.4e-06	0.000994	< 1e-07	66.51	75.85	0.88	ILMN_3213805	LOC728170
55	4.7e-06	0.00102	< 1e-07	127.75	111.97	1.14	ILMN_1731113	ZBTB43
56	4.7e-06	0.00102	< 1e-07	777.12	644.61	1.21	ILMN_2143822	ZNF148
57	5e-06	0.00107	< 1e-07	484.36	428.96	1.13	ILMN_1700109	PTOV1
58	5.6e-06	0.00116	< 1e-07	63.88	72.32	0.88	ILMN_3299604	LOC732229
59	5.7e-06	0.00116	< 1e-07	71.41	82.44	0.87	ILMN_2172221	SUMO1P3
60	5.7e-06	0.00116	< 1e-07	218.2	249.02	0.88	ILMN_1708160	KPNA2
61	5.8e-06	0.00116	< 1e-07	1309.43	1617.1	0.81	ILMN_3264543	LOC100128060
62	6.2e-06	0.00122	< 1e-07	7810.9	6927	1.13	ILMN_3227732	LOC729789
63	6.6e-06	0.00128	< 1e-07	75.68	67.79	1.12	ILMN_1748831	PPP1R13B
64	6.7e-06	0.00128	< 1e-07	149.46	132.42	1.13	ILMN_1679725	PCYOX1
65	6.9e-06	0.00129	< 1e-07	232.66	201.6	1.15	ILMN_1771800	PRKCA
66	7.1e-06	0.00129	< 1e-07	63.13	76.32	0.83	ILMN_1665515	MGC4677
67	7.1e-06	0.00129	< 1e-07	160.33	188.78	0.85	ILMN_2163732	ATG3
68	7.6e-06	0.0013	< 1e-07	57.09	50.52	1.13	ILMN_1765796	ENO2
69	7.9e-06	0.0013	< 1e-07	198.25	173.03	1.15	ILMN_1814044	CABIN1
70	8e-06	0.0013	< 1e-07	77.94	67.99	1.15	ILMN_1728810	NDUFS1
71	8e-06	0.0013	< 1e-07	645.3	563.06	1.15	ILMN_2321416	DIAPH1
72	8.1e-06	0.0013	< 1e-07	206.48	229.87	0.9	ILMN_1727617	XRN2
73	8.2e-06	0.0013	< 1e-07	781.19	624.61	1.25	ILMN_2374244	DYRK2
74	8.3e-06	0.0013	< 1e-07	135.27	122.68	1.1	ILMN_1869087
75	8.3e-06	0.0013	< 1e-07	394.3	452.09	0.87	ILMN_2231189	HIAT1
76	8.5e-06	0.0013	< 1e-07	268.36	233.11	1.15	ILMN_1773620	SMARCC2
77	8.5e-06	0.0013	< 1e-07	169.63	202.58	0.84	ILMN_3279092	LOC645691
78	8.7e-06	0.0013	< 1e-07	646.01	565.7	1.14	ILMN_2390338	UBE2E3
79	8.7e-06	0.0013	< 1e-07	171.82	154.01	1.12	ILMN_2082324	SLC36A4
80	8.8e-06	0.0013	0.0001	243.51	323.07	0.75	ILMN_2222688	TMSB4X
81	8.8e-06	0.0013	< 1e-07	116.61	105.69	1.1	ILMN_1903077
82	8.8e-06	0.0013	< 1e-07	101.73	114.14	0.89	ILMN_1652716	THEX1
83	9.1e-06	0.0013	< 1e-07	86.09	98.38	0.88	ILMN_3247059	HYALP1
84	9.1e-06	0.0013	< 1e-07	104.58	137.42	0.76	ILMN_3273491	LOC100130332
85	9.3e-06	0.0013	< 1e-07	387.34	343.16	1.13	ILMN_1760303	PIK3R1
86	9.3e-06	0.0013	< 1e-07	114.75	130.74	0.88	ILMN_3199772	LOC100131253
87	9.3e-06	0.0013	< 1e-07	651.84	582.23	1.12	ILMN_1656676	ZYG11B
88	9.7e-06	0.00133	< 1e-07	2043.88	1802.68	1.13	ILMN_3236637	PIP4K2A
89	9.8e-06	0.00133	< 1e-07	286.28	254.3	1.13	ILMN_1826531
90	9.8e-06	0.00133	< 1e-07	213.19	192.94	1.1	ILMN_3251379	SLC35E1
91	1e-05	0.00134	< 1e-07	252.02	330.94	0.76	ILMN_1775473	LOC400652
92	1.01e-05	0.00134	< 1e-07	134.27	157.03	0.86	ILMN_2086952	TOP1P1
93	1.06e-05	0.00137	< 1e-07	93.01	105.89	0.88	ILMN_3248208	LOC100132888
94	1.06e-05	0.00137	< 1e-07	4963.54	4355.52	1.14	ILMN_3299478	LOC728428
95	1.08e-05	0.00137	< 1e-07	181.25	161.67	1.12	ILMN_1684210	NPAL3
96	1.08e-05	0.00137	0.0001	81.58	97.67	0.84	ILMN_3288218	LOC644315
97	1.25e-05	0.00157	< 1e-07	390.08	339.49	1.15	ILMN_1657361	CBX7
98	1.27e-05	0.00158	< 1e-07	486.91	573.88	0.85	ILMN_2171289	SAMSN1
99	1.31e-05	0.00161	< 1e-07	283.32	336.32	0.84	ILMN_3204890	LOC345041
100	1.36e-05	0.00166	< 1e-07	297.55	345.47	0.86	ILMN_1679450	LOC730746
101	1.41e-05	0.0017	< 1e-07	111.69	99.44	1.12	ILMN_2103919	LRFN3
102	1.45e-05	0.00173	< 1e-07	61.37	68.06	0.9	ILMN_3283569	LOC389053
103	1.48e-05	0.00175	< 1e-07	350.66	455.3	0.77	ILMN_1724474	CARD16
104	1.59e-05	0.00187	< 1e-07	61.35	67.89	0.9	ILMN_3270676	LOC100129139
105	1.62e-05	0.00188	0.0001	82.2	94.81	0.87	ILMN_1718001	PHKB
106	1.63e-05	0.00188	< 1e-07	873.4	780.62	1.12	ILMN_1738579	VHL
107	1.67e-05	0.0019	< 1e-07	81.85	92.01	0.89	ILMN_3252395	LOC100129934
108	1.69e-05	0.00191	< 1e-07	64.31	57.97	1.11	ILMN_2107991	HABP4
109	1.75e-05	0.00196	< 1e-07	1002.6	1268.21	0.79	ILMN_1816342
110	1.79e-05	0.00198	< 1e-07	89.01	102.66	0.87	ILMN_1781537	KDM1B
111	1.8e-05	0.00198	< 1e-07	51.16	46.54	1.1	ILMN_1697088	ARMC5
112	1.83e-05	0.00199	< 1e-07	1354.38	1214.1	1.12	ILMN_2106902	CHES1
113	1.88e-05	0.00201	< 1e-07	142.26	126.97	1.12	ILMN_3275575	LOC648980
114	1.88e-05	0.00201	< 1e-07	677.48	815.19	0.83	ILMN_3305993	LOC728602
115	1.92e-05	0.00203	< 1e-07	289.06	334.5	0.86	ILMN_1660812	C14orf11
116	1.93e-05	0.00203	< 1e-07	71.84	81.68	0.88	ILMN_3208305	LOC728179
117	1.96e-05	0.00204	0.0001	128.8	149.41	0.86	ILMN_1709360	CENTD1
118	1.99e-05	0.00205	< 1e-07	9296.99	8338.22	1.11	ILMN_2154566	RPL10A
119	2e-05	0.00205	0.0001	2328.67	1958.07	1.19	ILMN_1656287	SPOCK2
120	2.03e-05	0.00206	< 1e-07	96.64	85.03	1.14	ILMN_2399036	SEPN1
121	2.07e-05	0.00209	< 1e-07	94.8	106.18	0.89	ILMN_1658176	ABCG1
122	2.1e-05	0.0021	< 1e-07	563.65	671.43	0.84	ILMN_1793950	P704P
123	2.17e-05	0.00215	< 1e-07	115.14	142.11	0.81	ILMN_1651617	CTNNB1
124	2.29e-05	0.00224	< 1e-07	271.88	245.66	1.11	ILMN_3237507	LOC552889
125	2.29e-05	0.00224	< 1e-07	173.26	197.05	0.88	ILMN_1701289	MGC40489
126	2.31e-05	0.00224	0.0002	64.34	76.34	0.84	ILMN_1717757	CALML4
127	2.38e-05	0.00228	< 1e-07	490.97	426.82	1.15	ILMN_1795922	CCDC16
128	2.4e-05	0.00228	< 1e-07	259.82	236.77	1.1	ILMN_1675674	UBE4B
129	2.41e-05	0.00228	< 1e-07	103.91	116.56	0.89	ILMN_2141157	RANBP9
130	2.55e-05	0.00237	0.0002	113.95	133.97	0.85	ILMN_2223836	CHORDC1
131	2.56e-05	0.00237	0.0003	262.49	313.77	0.84	ILMN_2398474	RAP1B
132	2.56e-05	0.00237	< 1e-07	81.51	93.56	0.87	ILMN_1680887	LOC643550
133	2.64e-05	0.00242	0.0001	115.32	103.71	1.11	ILMN_1915076
134	2.72e-05	0.00248	< 1e-07	2106.84	1910.32	1.1	ILMN_1737163	SH3BGRL3
135	2.77e-05	0.0025	0.0001	121.99	105.07	1.16	ILMN_1687440	HIPK2
136	2.94e-05	0.00262	0.0002	130.49	146.49	0.89	ILMN_3199896	LOC442153
137	2.94e-05	0.00262	< 1e-07	1001.01	836.52	1.2	ILMN_1670263	C1orf71
138	3.05e-05	0.00267	0.0001	421.28	369.04	1.14	ILMN_1788384	C9orf5
139	3.06e-05	0.00267	< 1e-07	689.04	623.37	1.11	ILMN_1767475	CERK
140	3.08e-05	0.00267	< 1e-07	283.19	256.61	1.1	ILMN_1757877	HCFC1R1
141	3.09e-05	0.00267	< 1e-07	125.34	180.93	0.69	ILMN_2391051	FCGR1B
142	3.11e-05	0.00267	< 1e-07	94.77	82.79	1.14	ILMN_1675130	NFIC
143	3.14e-05	0.00268	< 1e-07	214.79	195.2	1.1	ILMN_1792910	MNT
144	3.16e-05	0.00268	< 1e-07	455.94	339.98	1.34	ILMN_3290035	LOC653737
145	3.2e-05	0.00269	< 1e-07	356.61	422	0.85	ILMN_1794150	LOC654074
146	3.28e-05	0.00273	< 1e-07	92.41	82.46	1.12	ILMN_1789909	TBC1D9B
147	3.29e-05	0.00273	0.0001	180.08	207.91	0.87	ILMN_2227368	SELT
148	3.35e-05	0.00276	< 1e-07	98.02	111.57	0.88	ILMN_3222295	LOC729409
149	3.43e-05	0.00281	< 1e-07	147.19	134.04	1.1	ILMN_2225348	ZNF805
150	3.48e-05	0.00282	< 1e-07	359.03	283.66	1.27	ILMN_1708414	GNL3L
151	3.49e-05	0.00282	< 1e-07	452.7	410.91	1.1	ILMN_1903159
152	3.53e-05	0.00283	< 1e-07	144	127.58	1.13	ILMN_1691425	LDOC1L
153	3.58e-05	0.00284	< 1e-07	64.37	71.12	0.91	ILMN_1695583	LOC644094
154	3.59e-05	0.00284	0.0001	316.15	371.53	0.85	ILMN_1798940	LOC644131
155	3.62e-05	0.00285	0.0001	226.89	207.4	1.09	ILMN_2070355	SDHAF1
156	3.64e-05	0.00285	< 1e-07	454.74	405.67	1.12	ILMN_1876924	WNK1
157	3.69e-05	0.00287	< 1e-07	154.55	133.31	1.16	ILMN_2120965	NPAT
158	3.71e-05	0.00287	< 1e-07	116.66	100.18	1.16	ILMN_1687442	TNIK
159	3.74e-05	0.00287	< 1e-07	161.48	146.71	1.1	ILMN_1667577	LCMT2
160	3.78e-05	0.00288	< 1e-07	504.49	455.16	1.11	ILMN_2087575	ZC3H4
161	3.83e-05	0.0029	< 1e-07	85.74	75.53	1.14	ILMN_3246869	SCARNA21
162	3.91e-05	0.00294	< 1e-07	1012.95	925.29	1.09	ILMN_2241775	TROVE2
163	3.97e-05	0.00294	< 1e-07	343.11	298.56	1.15	ILMN_1763091	C14orf43
164	3.98e-05	0.00294	< 1e-07	123.53	112.52	1.1	ILMN_1782129	ZBED4
165	3.99e-05	0.00294	< 1e-07	323.32	262.74	1.23	ILMN_1794588	DYRK2
166	4.03e-05	0.00294	< 1e-07	190.46	229.82	0.83	ILMN_1807423	IGF2BP3
167	4.05e-05	0.00294	0.0001	90.71	105.91	0.86	ILMN_2219628	SSB
168	4.05e-05	0.00294	0.0001	135.21	161.9	0.84	ILMN_1700810	HSPCAL3
169	4.15e-05	0.003	0.0001	292.4	260.3	1.12	ILMN_1788778	41163
170	4.18e-05	0.003	< 1e-07	2036.38	1830	1.11	ILMN_1797342	FNBP1
171	4.2e-05	0.003	< 1e-07	1964.65	1795.78	1.09	ILMN_1662799	GPSM3
172	4.25e-05	0.00302	< 1e-07	210.39	243.38	0.86	ILMN_2362368	U2AF1
173	4.35e-05	0.00305	< 1e-07	275.4	321.36	0.86	ILMN_2099798	LYPLA1
174	4.35e-05	0.00305	0.0001	234.39	271.69	0.86	ILMN_1662409	LOC440525
175	4.37e-05	0.00305	< 1e-07	363.48	327.97	1.11	ILMN_1683700	TNFSF12
176	4.42e-05	0.00306	< 1e-07	129.47	117.54	1.1	ILMN_1704452	BCL9
177	4.44e-05	0.00306	< 1e-07	807.16	720.38	1.12	ILMN_1713178	FAM116A
178	4.57e-05	0.00313	< 1e-07	718.08	636.31	1.13	ILMN_2097793	ZBTB4
179	4.59e-05	0.00313	0.0002	65.64	75.15	0.87	ILMN_3245578	LOC729510
180	4.82e-05	0.00327	0.0001	83.32	74.22	1.12	ILMN_1757370	SMPD1
181	4.94e-05	0.00333	< 1e-07	134.73	156.58	0.86	ILMN_1768558	LOC727848
182	5.09e-05	0.0034	0.0001	98.47	113.63	0.87	ILMN_1791933	CCDC82
183	5.1e-05	0.0034	0.0001	174.87	159.08	1.1	ILMN_1796180	CRY2
184	5.33e-05	0.00353	< 1e-07	172.83	195.22	0.89	ILMN_1744302	LOC645489
185	5.5e-05	0.0036	0.0001	82.3	92.01	0.89	ILMN_3284845	LOC100132797
186	5.51e-05	0.0036	< 1e-07	76.25	69.11	1.1	ILMN_1813175	LPHN1
187	5.56e-05	0.0036	< 1e-07	1097.55	1257.51	0.87	ILMN_1764163	LOC644330
188	5.56e-05	0.0036	0.0001	60.06	68.58	0.88	ILMN_2167709	NIPSNAP3A
189	5.57e-05	0.0036	< 1e-07	56.94	64.46	0.88	ILMN_3293025	LOC728170
190	5.66e-05	0.00363	0.0001	2486.12	2932.79	0.85	ILMN_1803742	CAPZA1
191	5.8e-05	0.0037	< 1e-07	153.43	174.57	0.88	ILMN_3245015	LOC440563
192	5.82e-05	0.0037	< 1e-07	71.07	78.67	0.9	ILMN_2370916	POTE2
193	5.89e-05	0.00372	< 1e-07	74.75	68.07	1.1	ILMN_2288070	FTO
194	6.12e-05	0.00385	< 1e-07	753.23	664.56	1.13	ILMN_1894072
195	6.2e-05	0.00388	0.0001	149.35	134.38	1.11	ILMN_1714327	SETD1A
196	6.27e-05	0.0039	0.0002	177.71	161.85	1.1	ILMN_1672940	ZNF562
197	6.29e-05	0.0039	< 1e-07	1027.35	1252.24	0.82	ILMN_2066849	FAM26F
198	6.41e-05	0.00395	< 1e-07	91.87	101.08	0.91	ILMN_2309549	AMZ2
199	6.47e-05	0.00397	< 1e-07	4464.33	4068.82	1.1	ILMN_1911042
200	6.54e-05	0.00399	0.0001	121.04	109.93	1.1	ILMN_1792681	CCDC86
201	6.57e-05	0.00399	< 1e-07	126.01	141	0.89	ILMN_1732318	PTK2B
202	6.79e-05	0.00406	< 1e-07	481.2	571.61	0.84	ILMN_3271412	LOC100127922
203	6.8e-05	0.00406	0.0001	49.08	56.31	0.87	ILMN_1657527	CLEC12B
204	6.8e-05	0.00406	< 1e-07	96.14	84.08	1.14	ILMN_1771824	DNAJC30
205	6.82e-05	0.00406	< 1e-07	78.07	69.18	1.13	ILMN_1787691	CITED4
206	6.87e-05	0.00406	< 1e-07	6201.27	5457.46	1.14	ILMN_3281599	LOC642741
207	6.89e-05	0.00406	< 1e-07	60.74	69.87	0.87	ILMN_1694100	PRIM2
208	7.08e-05	0.00414	< 1e-07	55.32	60.7	0.91	ILMN_3240354	CYCSP52
209	7.09e-05	0.00414	< 1e-07	46.38	51.05	0.91	ILMN_3294741	LOC644496
210	7.16e-05	0.00416	< 1e-07	69.66	82.86	0.84	ILMN_1727762	CASP1
211	7.23e-05	0.00418	0.0001	63.17	57.88	1.09	ILMN_1805007	SEMA4F
212	7.34e-05	0.00422	< 1e-07	1219.26	1062.87	1.15	ILMN_1728605	TTC3
213	7.47e-05	0.00428	0.0001	318.83	289.09	1.1	ILMN_1670638	PITPNC1
214	7.53e-05	0.00429	< 1e-07	103.45	91.24	1.13	ILMN_1772486	ELF2
215	7.58e-05	0.00429	< 1e-07	142.19	157.73	0.9	ILMN_1773935	TMEM165
216	7.59e-05	0.00429	< 1e-07	74.13	64.28	1.15	ILMN_1702407	SPIN1
217	7.7e-05	0.00432	0.0001	134.8	155.46	0.87	ILMN_2147471	PI4K2B
218	7.76e-05	0.00432	0.0001	187.12	221.29	0.85	ILMN_2287296	SYF2
219	7.76e-05	0.00432	< 1e-07	48.38	53.74	0.9	ILMN_3197896	LOC442319
220	7.8e-05	0.00433	0.0001	73.55	81.16	0.91	ILMN_2093980	TMEM38B
221	7.94e-05	0.00438	< 1e-07	132.05	187.71	0.7	ILMN_3247506	FCGR1C
222	8.15e-05	0.00447	0.0001	139.55	164.53	0.85	ILMN_1666477	LOC390876
223	8.17e-05	0.00447	0.0002	349.64	405.48	0.86	ILMN_3244579	LOC649330
224	8.21e-05	0.00447	0.0001	106.27	96.79	1.1	ILMN_2140389	TMEM185A
225	8.39e-05	0.00455	0.0001	140.47	162.24	0.87	ILMN_1665333	LOC645351
226	8.46e-05	0.00457	< 1e-07	742.01	627.45	1.18	ILMN_1745620	KRCC1
227	8.5e-05	0.00457	0.0002	97.09	113.7	0.85	ILMN_3227604	LOC729342
228	8.59e-05	0.0046	0.0001	145.99	114.12	1.28	ILMN_3240594	RNU4ATAC
229	9.01e-05	0.0048	< 1e-07	678.53	528.51	1.28	ILMN_1892403	SNORD13
230	9.12e-05	0.00484	< 1e-07	358.07	321.85	1.11	ILMN_1766185	AXIN1
231	9.16e-05	0.00484	< 1e-07	177.49	209.79	0.85	ILMN_1759973	NDUFA5
232	9.31e-05	0.00489	0.0001	2012.53	1750.97	1.15	ILMN_1671314	UXT
233	9.33e-05	0.00489	0.0001	79.65	91.97	0.87	ILMN_3229038	LOC728310
234	9.39e-05	0.0049	0.0004	1197.89	1382.39	0.87	ILMN_3217285	LOC389322
235	9.66e-05	0.005	< 1e-07	168.16	186.04	0.9	ILMN_1706275	C8orf33
236	9.67e-05	0.005	0.0001	1248.82	1475.29	0.85	ILMN_1652787	PIK3AP1
237	9.8e-05	0.00501	0.0001	629.32	576.75	1.09	ILMN_1766435	WBP11
238	9.82e-05	0.00501	0.0004	124.04	141.82	0.87	ILMN_3251365	PGGT1B
239	9.82e-05	0.00501	< 1e-07	190.18	170.62	1.11	ILMN_1721225	C20orf4
240	9.95e-05	0.00506	0.0003	63.82	73.86	0.86	ILMN_2227800	ARFGAP3
241	0.0001005	0.00509	< 1e-07	69.26	78.55	0.88	ILMN_1770697	LOC644063
242	0.0001013	0.00511	0.0001	74.14	82.49	0.9	ILMN_3291344	LOC202227
243	0.0001019	0.00512	0.0001	59.7	66.51	0.9	ILMN_1802907	CBWD1
244	0.0001028	0.00512	< 1e-07	180.04	163.08	1.1	ILMN_1839719
245	0.0001029	0.00512	0.0001	292.31	323.15	0.9	ILMN_3299804	ZNF638
246	0.0001034	0.00513	< 1e-07	599.91	550.11	1.09	ILMN_2388975	CERK
247	0.0001046	0.00516	< 1e-07	183.36	205.72	0.89	ILMN_1729142	CENPV
248	0.0001048	0.00516	0.0001	60.61	55.43	1.09	ILMN_2268409	VPS13B
249	0.0001054	0.00516	0.0001	60.19	67.09	0.9	ILMN_3290640	LOC345645
250	0.0001061	0.00516	0.0003	98.56	112.7	0.87	ILMN_1696031	C15orf21
251	0.0001067	0.00516	< 1e-07	67.55	57.21	1.18	ILMN_2252705	VPS13B
252	0.0001067	0.00516	< 1e-07	102.36	115.98	0.88	ILMN_1685173	LOC650638
253	0.000107	0.00516	0.0001	112.77	129.04	0.87	ILMN_1779032	LOC642502
254	0.0001083	0.00517	0.0001	168.1	153.93	1.09	ILMN_1792110	C10orf76
255	0.0001083	0.00517	0.0002	100.49	115.42	0.87	ILMN_1685985	LOC649150
256	0.0001086	0.00517	< 1e-07	1183.95	1496.66	0.79	ILMN_3246097	LOC649839
257	0.0001088	0.00517	< 1e-07	48.71	58.34	0.84	ILMN_2123217	TNFAIP6
258	0.0001093	0.00517	< 1e-07	44.26	40.53	1.09	ILMN_1660907	PTPRE
259	0.0001105	0.00518	< 1e-07	1885.27	1386.49	1.36	ILMN_3280565	LOC389342
260	0.0001109	0.00518	0.0003	411.31	468.75	0.88	ILMN_3234615	LOC728650
261	0.0001109	0.00518	0.0001	91	78.8	1.15	ILMN_2349444	NUDT2
262	0.0001117	0.0052	0.0002	619.48	686.03	0.9	ILMN_1751816	MCTS1
263	0.0001131	0.00522	0.0001	501.71	446.6	1.12	ILMN_1733511	GOLGA3
264	0.0001133	0.00522	< 1e-07	86.1	77.69	1.11	ILMN_1682402	SNORD46
265	0.0001133	0.00522	< 1e-07	387.5	354.54	1.09	ILMN_1651719	MBTPS1
266	0.0001164	0.00534	0.0001	225.71	273.86	0.82	ILMN_1725314	GBP3
267	0.0001184	0.00541	0.0001	152.24	139.75	1.09	ILMN_1651438	ZFPM1
268	0.0001196	0.00545	< 1e-07	285.61	254.82	1.12	ILMN_3239225	RNY3
269	0.0001201	0.00545	0.0001	167.85	154.16	1.09	ILMN_1801504	RUNX1
270	0.0001219	0.00551	0.0002	130.33	119.65	1.09	ILMN_1706764	GOLPH3L
271	0.0001224	0.00551	0.0002	67.29	73.58	0.91	ILMN_1727153	LOC390414
272	0.0001241	0.00557	0.0003	172.59	207.56	0.83	ILMN_3272476	LOC100130624
273	0.0001249	0.00558	0.0001	52.85	48.36	1.09	ILMN_1688672	SIGLECP3
274	0.0001258	0.00558	< 1e-07	952.08	782.51	1.22	ILMN_3238435	SNORA12
275	0.0001261	0.00558	0.0001	612.51	538.55	1.14	ILMN_1875123
276	0.0001262	0.00558	0.0001	92.96	108.68	0.86	ILMN_1723734	LOC647908
277	0.0001272	0.0056	0.0002	73.81	65.79	1.12	ILMN_1681467	RAB11FIP4
278	0.0001289	0.00566	0.0001	223.18	256.97	0.87	ILMN_3304887	LOC729423
279	0.0001295	0.00566	0.0001	289.71	351.42	0.82	ILMN_1771861	LOC642250
280	0.0001299	0.00566	< 1e-07	283.33	333.8	0.85	ILMN_3274351	LOC644037
281	0.0001319	0.00572	0.0001	1227.97	1535.71	0.8	ILMN_1690295	LOC648343
282	0.0001322	0.00572	0.0001	74.06	68.06	1.09	ILMN_1683786	FYTTD1
283	0.0001333	0.00575	0.0001	274.18	250.36	1.1	ILMN_1769637	RNMT
284	0.0001343	0.00577	< 1e-07	421.25	366.1	1.15	ILMN_1770433	PIK3CG
285	0.0001365	0.00584	0.0004	52.61	57.82	0.91	ILMN_2115974	GSDM1
286	0.0001368	0.00584	0.0003	154.72	124.46	1.24	ILMN_2302757	FCGBP
287	0.0001376	0.00584	0.0001	1096.31	843.84	1.3	ILMN_2342579	IL7R
288	0.0001378	0.00584	0.0001	110.36	125.55	0.88	ILMN_1799837	LOC727848
289	0.0001396	0.00589	< 1e-07	88.4	99.35	0.89	ILMN_3241818	LOC100133398
290	0.0001401	0.00589	0.0001	568.71	490.3	1.16	ILMN_2204754	TMX4
291	0.0001421	0.00596	0.0002	219.92	267.14	0.82	ILMN_2168866	C6orf62
292	0.0001445	0.00604	< 1e-07	407.51	443.72	0.92	ILMN_2157709	C14orf19
293	0.0001473	0.00613	< 1e-07	438.82	508.73	0.86	ILMN_3234547	LOC100133803
294	0.0001483	0.00615	< 1e-07	489.29	447.82	1.09	ILMN_1797005	PGLS
295	0.0001496	0.00619	< 1e-07	238.92	215.39	1.11	ILMN_1766359	GATAD2B
296	0.000151	0.00622	< 1e-07	183.92	208.64	0.88	ILMN_1810953	LOC653496
297	0.0001556	0.00639	0.0001	259.26	313.19	0.83	ILMN_1794492	HOXC6
298	0.0001563	0.00639	0.0001	642.49	738.18	0.87	ILMN_2379835	SUMO1
299	0.000158	0.00639	< 1e-07	87.25	96.77	0.9	ILMN_3239871	LOC643896
300	0.0001581	0.00639	0.0002	571.86	672.33	0.85	ILMN_1698100	ANXA2P1
301	0.0001584	0.00639	0.0001	167.61	149.23	1.12	ILMN_2082244	FOXK1
302	0.0001588	0.00639	< 1e-07	174.07	153.53	1.13	ILMN_3235597	LOC147727
303	0.0001592	0.00639	0.0003	94.91	109.99	0.86	ILMN_2117240	DCK
304	0.0001597	0.00639	0.0001	462.43	370.19	1.25	ILMN_1658399	KLRG1
305	0.0001602	0.00639	0.0003	74.35	82.57	0.9	ILMN_2104409	RPL29P2
306	0.0001606	0.00639	0.0001	625.02	718.79	0.87	ILMN_1761801	LOC147804
307	0.0001608	0.00639	0.0001	88.69	78.44	1.13	ILMN_1664265	EPHA1
308	0.000163	0.00645	0.0002	424.76	385.45	1.1	ILMN_2379130	IRAK1
309	0.0001633	0.00645	0.0004	797.14	947.65	0.84	ILMN_3243871	LOC642076
310	0.0001641	0.00646	0.0001	88.63	76.24	1.16	ILMN_2249018	LOC389816
311	0.0001646	0.00646	0.0002	106.38	96.21	1.11	ILMN_1770963	NAALADL1
312	0.0001667	0.00652	< 1e-07	215.68	271.59	0.79	ILMN_2374036	CTSL1
313	0.0001674	0.00653	0.0002	103.21	114.75	0.9	ILMN_3268475	LOC100128533
314	0.0001681	0.00653	0.0004	1029.65	938.07	1.1	ILMN_3251472	TOMM20
315	0.0001694	0.00656	< 1e-07	91.35	80.59	1.13	ILMN_1779190	ALKBH8
316	0.0001702	0.00657	0.0002	214.51	241.86	0.89	ILMN_1704261	RANGRF
317	0.0001716	0.00661	0.0002	179.51	203.44	0.88	ILMN_2230592	MRPL3
318	0.0001748	0.00671	0.0002	62.91	69.17	0.91	ILMN_2190851	PPID
319	0.0001762	0.00674	0.0001	125.27	97.54	1.28	ILMN_2096012	UHMK1
320	0.0001781	0.00679	< 1e-07	198.01	180.92	1.09	ILMN_1810147	ZNF524
321	0.000184	0.00697	0.0001	303.45	266.98	1.14	ILMN_2091412	FLT3LG
322	0.0001841	0.00697	0.0002	452.77	544.27	0.83	ILMN_3302139	LOC729687
323	0.0001846	0.00697	0.0002	93.76	104.4	0.9	ILMN_2316278	MAGED4B
324	0.0001856	0.00698	0.0001	1017.45	911.99	1.12	ILMN_1869109
325	0.0001858	0.00698	0.0001	269.35	239.61	1.12	ILMN_1672807	CA5B
326	0.0001873	0.00699	0.0003	383.53	457.1	0.84	ILMN_3256445	LOC100130289
327	0.0001874	0.00699	0.0001	78.75	72.26	1.09	ILMN_1760305	KIAA1545
328	0.0001891	0.00703	0.0001	699.64	596.51	1.17	ILMN_2181968	CBL
329	0.0001927	0.00713	0.0002	126.12	116.19	1.09	ILMN_1886769
330	0.0001928	0.00713	0.0001	838.6	744.14	1.13	ILMN_1821176
331	0.0001946	0.00717	0.0004	69.47	76.78	0.9	ILMN_1822571
332	0.0001956	0.00719	0.0002	147.64	172.41	0.86	ILMN_2260756	GSDMB
333	0.0001962	0.00719	0.0001	104.37	94.46	1.1	ILMN_2366703	SGK3
334	0.0001993	0.00728	< 1e-07	617.02	703.61	0.88	ILMN_1691717	RHBDF2
335	0.0002014	0.00734	0.0002	53.68	58.19	0.92	ILMN_3285346	LOC643387
336	0.0002025	0.00735	0.0005	188.95	214.76	0.88	ILMN_1732313	LOC647195
337	0.000203	0.00735	0.0002	81.4	94.46	0.86	ILMN_1784665	LOC387820
338	0.0002052	0.00741	0.0005	453.42	411.38	1.1	ILMN_1706426	DSTN
339	0.0002077	0.00746	0.0002	283.25	243.43	1.16	ILMN_2394250	PLEKHA1
340	0.0002078	0.00746	0.0002	185.89	170.44	1.09	ILMN_1769390	ABHD15
341	0.00021	0.00751	< 1e-07	182.31	204.35	0.89	ILMN_3305447	LOC729898
342	0.0002107	0.00751	0.0001	833.14	768.51	1.08	ILMN_1728163	CTDSP1
343	0.000211	0.00751	0.0001	164.2	196.51	0.84	ILMN_3226301	LOC729798
344	0.0002125	0.00754	0.0003	464.22	416.44	1.11	ILMN_1738955	C10orf104
345	0.0002135	0.00755	0.0001	59.52	53.04	1.12	ILMN_2092390	CXorf20
346	0.0002156	0.0076	0.0002	63.82	70.96	0.9	ILMN_1671642	CSNK1A1L
347	0.0002183	0.00768	0.0001	85.29	78.54	1.09	ILMN_2393341	LIAS
348	0.0002193	0.00768	0.0001	78.2	87.44	0.89	ILMN_1670565	HSPA13
349	0.0002196	0.00768	0.0001	3599.04	3304.5	1.09	ILMN_3285198	LOC389168
350	0.0002225	0.00776	0.0004	104.48	120.65	0.87	ILMN_2145760	YIPF4
351	0.0002244	0.00777	0.0003	80.97	72.91	1.11	ILMN_1867517
352	0.0002245	0.00777	0.0003	456.14	397.71	1.15	ILMN_1738749	MAST3
353	0.0002251	0.00777	0.0003	71.45	78.32	0.91	ILMN_2152095	RNASEN
354	0.0002254	0.00777	0.0003	470.39	421.78	1.12	ILMN_1725992	RAPGEF6
355	0.0002269	0.00777	0.0003	8166.85	7364.07	1.11	ILMN_2338785	RPS14
356	0.000227	0.00777	< 1e-07	86.51	79.47	1.09	ILMN_1689189	ZBTB3
357	0.0002272	0.00777	0.0003	119.7	107.72	1.11	ILMN_1668834	RSF1
358	0.0002281	0.00777	0.0002	882.84	802.91	1.1	ILMN_1682264	DCAF7
359	0.0002302	0.00782	0.0003	1973.08	1811.49	1.09	ILMN_2378952	GPX4
360	0.0002314	0.00784	< 1e-07	683.53	617.75	1.11	ILMN_1719303	P4HB
361	0.0002323	0.00785	0.0001	511.62	447.44	1.14	ILMN_1653266	DNAJB14
362	0.000234	0.00789	0.0002	8242.15	7419.8	1.11	ILMN_1712155	RPL6
363	0.0002366	0.00793	0.0003	50.66	55.03	0.92	ILMN_2221066	VDAC2
364	0.0002372	0.00793	0.0003	142.97	162.04	0.88	ILMN_2133146	NUDT21
365	0.0002373	0.00793	0.0004	74.26	67.03	1.11	ILMN_1722855	VEGFB
366	0.0002396	0.00799	0.0001	76.94	70.16	1.1	ILMN_1765001	NAT6
367	0.0002407	0.008	0.0004	207	227.05	0.91	ILMN_1729374	ETFB
368	0.0002418	0.00802	0.0001	341.7	382.9	0.89	ILMN_3211857	LOC648822
369	0.0002485	0.00822	0.0002	620.75	559.85	1.11	ILMN_1666761	PPP2R5E
370	0.0002513	0.00826	0.0005	2724.55	2426.93	1.12	ILMN_1722872	MYH9
371	0.0002517	0.00826	0.0003	200.34	222.42	0.9	ILMN_2135232	SFRS3
372	0.0002519	0.00826	0.0004	58.92	65.03	0.91	ILMN_3235118	LOC729760
373	0.0002532	0.00828	0.0003	182.39	166.18	1.1	ILMN_1718907	TSHZ1
374	0.0002543	0.00828	< 1e-07	109.22	152.2	0.72	ILMN_3214893	LOC100132761
375	0.0002544	0.00828	0.0003	58.61	52.04	1.13	ILMN_1703279	CXorf57
376	0.0002562	0.00829	0.0003	109.13	124.78	0.87	ILMN_1775293	LOC642954
377	0.0002566	0.00829	0.0002	92.56	83.58	1.11	ILMN_1698491	MBD3
378	0.0002569	0.00829	0.0004	71.49	81.1	0.88	ILMN_3279575	LOC100132521
379	0.0002604	0.00838	< 1e-07	66.67	73.44	0.91	ILMN_2400206	UBE2V1
380	0.0002619	0.00841	0.0002	710.27	648.53	1.1	ILMN_1675472	LOC644799
381	0.0002632	0.00843	0.0001	7683.95	6893.83	1.11	ILMN_2136133	PABPC1
382	0.0002655	0.00848	0.0003	854.03	782.11	1.09	ILMN_1739586	FEZ2
383	0.0002669	0.0085	0.0002	52.19	56.52	0.92	ILMN_3229446	LOC731308
384	0.0002676	0.0085	0.0002	82.23	75.93	1.08	ILMN_1673753	LOC642033
385	0.000269	0.00853	0.0001	224.97	205.41	1.1	ILMN_1738759	PIGT
386	0.0002706	0.00855	0.0002	2459.92	2266.5	1.09	ILMN_1775762	GNAI2
387	0.0002728	0.0086	0.0002	797.49	1000.34	0.8	ILMN_3252556	CARD16
388	0.0002746	0.00864	0.0004	270.79	331.54	0.82	ILMN_3188174	LOC100129067
389	0.0002766	0.00868	< 1e-07	65.55	71.16	0.92	ILMN_1745318	CREM
390	0.000281	0.00879	0.0007	66.1	74.38	0.89	ILMN_2213247	SPCS2
391	0.0002825	0.00882	0.0002	226.8	209.63	1.08	ILMN_1692026	SUV420H1
392	0.0002869	0.0089	< 1e-07	460.1	564.48	0.82	ILMN_3257030	FTHL16
393	0.0002872	0.0089	0.0002	136.84	125.28	1.09	ILMN_1669696	ZNF792
394	0.0002873	0.0089	0.0001	189.7	157.53	1.2	ILMN_1734855	SELPLG
395	0.0002915	0.009	0.0004	126.18	111.96	1.13	ILMN_2385220	DFFA
396	0.0002922	0.009	0.0002	89.8	102.62	0.88	ILMN_1784465	FAM91A2
397	0.0002959	0.00907	0.0003	431.26	497.96	0.87	ILMN_2096759	PSMC6
398	0.000296	0.00907	0.0004	119.54	133.23	0.9	ILMN_2073969	ABHD13
399	0.0002984	0.0091	0.0002	386.37	355.33	1.09	ILMN_2412807	DCTN1
400	0.0002984	0.0091	0.0002	69.65	80.94	0.86	ILMN_1668588	LOC648733
401	0.0002998	0.00912	0.0003	103.08	122.08	0.84	ILMN_2207720	ITM2B
402	0.0003033	0.0092	0.0002	117.52	128.81	0.91	ILMN_2208455	DDHD1
403	0.0003037	0.0092	0.0005	195.06	178.09	1.1	ILMN_1655612	ARRDC2
404	0.0003071	0.00927	0.0002	399.78	482.13	0.83	ILMN_1796099	LOC644380
405	0.0003078	0.00927	0.0003	1693.18	2021.4	0.84	ILMN_1703538	AIF1
406	0.0003091	0.00928	0.0001	449.97	521.31	0.86	ILMN_1671152	LOC649801
407	0.0003095	0.00928	0.0005	51.85	47.78	1.09	ILMN_3246005	LOC100133760
408	0.0003118	0.00932	0.0004	123.54	137.41	0.9	ILMN_1724391	LOC442064
409	0.0003124	0.00932	0.0004	784.79	889.84	0.88	ILMN_3234116	LOC730382
410	0.0003239	0.00962	< 1e-07	75.69	69.43	1.09	ILMN_3223953	LOC729519
411	0.0003252	0.00962	0.0003	167.99	144.74	1.16	ILMN_1714418	FAM101B
412	0.0003254	0.00962	0.0002	401.48	355.45	1.13	ILMN_2415179	CLSTN1
413	0.0003259	0.00962	0.0003	111.69	102.58	1.09	ILMN_1665205	ZNF260
414	0.0003264	0.00962	0.0003	136.34	159.9	0.85	ILMN_1716601	LOC441032
415	0.0003285	0.00966	0.0002	130.85	153.86	0.85	ILMN_3203868	LOC649873
416	0.0003301	0.00967	0.0003	59.94	66.18	0.91	ILMN_1693822	LOC402562
417	0.0003305	0.00967	0.0004	271.4	229.01	1.19	ILMN_1778347	NUDT2
418	0.0003328	0.00971	0.0006	1334.23	1171.91	1.14	ILMN_2075927	STK40
419	0.0003339	0.00972	0.0001	338.34	389.33	0.87	ILMN_2212156	PPIG
420	0.000335	0.00972	0.0005	80.69	100.36	0.8	ILMN_2381257	DSC2
421	0.0003352	0.00972	0.0002	80.73	73.02	1.11	ILMN_1789338	SORBS3
422	0.0003367	0.00974	0.0001	79.7	72.96	1.09	ILMN_3281502	LOC653375
423	0.0003389	0.00978	0.0001	502.61	564.23	0.89	ILMN_1767006	PSMB8
424	0.0003406	0.0098	0.0002	111.19	102.86	1.08	ILMN_1675055	C1orf166
425	0.0003445	0.00989	0.0006	3751.89	3320.73	1.13	ILMN_2087702	MYH9
426	0.0003478	0.00996	0.0003	187.15	173.15	1.08	ILMN_2390227	TBC1D9B
427	0.0003518	0.0101	0.0004	71.89	65.74	1.09	ILMN_1708029	C9orf127
428	0.0003553	0.0101	0.0002	929.8	849.6	1.09	ILMN_1734353	GPX4
429	0.0003554	0.0101	0.0003	78.47	70.44	1.11	ILMN_1694325	NFIX
430	0.0003564	0.0101	0.0001	147.57	160.06	0.92	ILMN_3307616	EPHA10
431	0.000359	0.0102	0.0004	830.62	713.92	1.16	ILMN_1776788	C5orf41
432	0.0003598	0.0102	0.0002	198.18	182.47	1.09	ILMN_1710738	RC3H2
433	0.0003613	0.0102	0.0002	149.99	172.31	0.87	ILMN_2142935	BLNK
434	0.0003618	0.0102	0.0004	124.33	142.02	0.88	ILMN_1741259	LOC649209
435	0.0003624	0.0102	0.0003	166.66	152.06	1.1	ILMN_1685854	C5orf53
436	0.0003659	0.0102	0.0007	60.57	68.23	0.89	ILMN_3240062	LOC729369
437	0.0003685	0.0103	0.0003	2155.6	1898.25	1.14	ILMN_1714567	AHNAK
438	0.0003702	0.0103	0.0004	87.72	80.13	1.09	ILMN_1821473
439	0.0003756	0.0104	0.0001	994.65	1264.81	0.79	ILMN_3275771	LOC642567
440	0.0003756	0.0104	0.0004	93	104.22	0.89	ILMN_1795846	PPP2R5C
441	0.0003773	0.0104	0.0004	568.07	656.61	0.87	ILMN_3285611	LOC388556
442	0.0003801	0.0105	0.0002	112.98	103.15	1.1	ILMN_1709114	MAP3K7IP1
443	0.0003803	0.0105	0.0001	57.48	53.13	1.08	ILMN_1791144	PMS2L1
444	0.0003812	0.0105	0.0005	191.6	228.11	0.84	ILMN_3284607	LOC728207
445	0.0003854	0.0105	0.0005	84.73	94.22	0.9	ILMN_3293114	LOC727821
446	0.0003863	0.0105	0.0004	443.43	397.36	1.12	ILMN_2246956	BCL2
447	0.0003867	0.0105	0.0002	166.88	208.32	0.8	ILMN_1812995	CTSL1
448	0.0003884	0.0105	0.0003	1869.61	2139.93	0.87	ILMN_3283664	LOC100132037
449	0.0003891	0.0105	0.0004	2077.41	1861.74	1.12	ILMN_1733176	LIMS1
450	0.0003895	0.0105	0.0004	432.79	481.82	0.9	ILMN_1696347	CTSC
451	0.0003896	0.0105	0.0002	274.36	248.94	1.1	ILMN_1814789	UBAP2L
452	0.0003904	0.0105	0.0005	116.2	125.6	0.93	ILMN_3276697	LOC646956
453	0.0003915	0.0105	0.0006	211.14	247.81	0.85	ILMN_1762330	C1D
454	0.0003943	0.0106	0.0002	95.38	87.87	1.09	ILMN_1785644	C20orf29
455	0.0003946	0.0106	0.0004	306.16	335.88	0.91	ILMN_3235216	IFT20
456	0.000396	0.0106	0.0003	77.24	84.18	0.92	ILMN_1846807
457	0.0003993	0.0107	0.0004	655.86	590.99	1.11	ILMN_1754220	SF3A2
458	0.0004004	0.0107	0.0005	89.21	100.67	0.89	ILMN_2318568	HCFC1R1
459	0.0004031	0.0107	0.0005	94.57	86.63	1.09	ILMN_2386818	URG4
460	0.0004096	0.0109	0.0001	129.46	152.1	0.85	ILMN_1696302	FABP5
461	0.0004101	0.0109	0.0004	340.32	384.81	0.88	ILMN_2210713	COMMD8
462	0.0004119	0.0109	0.0005	1412.49	1306.16	1.08	ILMN_2156267	EIF2AK1
463	0.0004135	0.0109	0.0009	146.56	130.92	1.12	ILMN_1747451	PLCXD1
464	0.0004144	0.0109	0.0003	123.7	136	0.91	ILMN_3249172	NCRNA00092
465	0.0004187	0.011	0.0009	99.43	88.55	1.12	ILMN_1743103	SH3PXD2A
466	0.0004206	0.011	0.0002	721.5	817.7	0.88	ILMN_1782222	KIAA1033
467	0.0004215	0.011	0.0004	59.23	54.64	1.08	ILMN_1662470	C10orf35
468	0.0004249	0.0111	0.0001	336.13	389.28	0.86	ILMN_1738678	C9orf130
469	0.0004295	0.0112	0.0003	54.59	59.51	0.92	ILMN_3280618	LOC728115
470	0.0004311	0.0112	0.0007	190.77	173.82	1.1	ILMN_1663160	ZNF337
471	0.0004316	0.0112	< 1e-07	212.38	191.48	1.11	ILMN_1811997	ZNF364
472	0.0004341	0.0112	0.0001	508.28	464.13	1.1	ILMN_1690806	PTPLB
473	0.0004355	0.0112	0.0008	111.99	130.47	0.86	ILMN_2129309	SEC23A
474	0.0004371	0.0113	0.0005	420.8	460.79	0.91	ILMN_2043109	TOP1P2
475	0.0004396	0.0113	0.0009	158.38	145.85	1.09	ILMN_2112493	DAP
476	0.0004408	0.0113	0.0007	318.77	275.23	1.16	ILMN_1706825	PKN2
477	0.0004424	0.0113	0.0002	73.43	66.99	1.1	ILMN_1651429	SELM
478	0.0004446	0.0113	0.0005	2078.56	1896.38	1.1	ILMN_1694057	EIF3K
479	0.0004462	0.0114	0.0003	368.97	338.23	1.09	ILMN_1688000	POLDIP3
480	0.0004472	0.0114	0.0006	119.84	100.79	1.19	ILMN_3248270	SNORD62B
481	0.0004509	0.0114	0.0005	220.79	195.03	1.13	ILMN_1805778	RBM12B
482	0.0004525	0.0115	0.0003	203.32	179.95	1.13	ILMN_1699991	LCK
483	0.0004576	0.0115	< 1e-07	3329.38	3042.01	1.09	ILMN_3305949	LOC730246
484	0.0004576	0.0115	0.001	239.31	216.06	1.11	ILMN_1673023	EP400
485	0.0004577	0.0115	0.0002	394.64	360.52	1.09	ILMN_2403946	FEZ2
486	0.000459	0.0115	0.0006	318.88	278.44	1.15	ILMN_2194627	GMCL1
487	0.0004609	0.0115	0.0003	125.77	142.61	0.88	ILMN_1798612	SNX20
488	0.0004633	0.0116	0.0006	268.38	302.03	0.89	ILMN_1751760	BCAS2
489	0.0004641	0.0116	0.0003	73.86	66.99	1.1	ILMN_2268618	PHF20L1
490	0.0004642	0.0116	0.0003	98.82	111.57	0.89	ILMN_1764297	ARF6
491	0.0004731	0.0117	0.0005	7321.37	6575.87	1.11	ILMN_3219340	LOC100131713
492	0.0004733	0.0117	0.0006	364.66	421.29	0.87	ILMN_1761464	CD74
493	0.0004797	0.0119	0.0003	331.03	369.64	0.9	ILMN_3298829	LOC729505
494	0.0004799	0.0119	0.0003	404.47	372.9	1.08	ILMN_2194828	C16orf53
495	0.0004828	0.0119	0.0005	50.67	55.96	0.91	ILMN_3279927	LOC100131675
496	0.0004836	0.0119	0.0006	1585.81	1417.74	1.12	ILMN_2057573	FAM62B
497	0.0004857	0.0119	0.0005	158.74	189.65	0.84	ILMN_2154094	STX7
498	0.0004876	0.0119	0.0002	4380.43	3787.59	1.16	ILMN_1844464
499	0.0004883	0.0119	0.0002	395.03	427.96	0.92	ILMN_3241469	LOC100134537
500	0.0004939	0.0121	0.0005	218.33	269.93	0.81	ILMN_1705330	LOC648863
501	0.0004983	0.0121	0.0005	148.81	165.5	0.9	ILMN_2361575	SNX14
502	0.0004996	0.0121	0.0005	134.56	153.21	0.88	ILMN_3234384	LOC728953
503	0.0005021	0.0122	0.0007	261.8	302.07	0.87	ILMN_2106931	PPP1R15B
504	0.0005051	0.0122	0.0003	167.02	141.63	1.18	ILMN_1813191	LOC653080
505	0.0005077	0.0122	0.0004	140.76	198.3	0.71	ILMN_2176063	FCGR1A
506	0.0005085	0.0122	0.0002	104.86	96.65	1.08	ILMN_1707342	LRIG1
507	0.0005086	0.0122	0.0004	161	147.25	1.09	ILMN_2205032	MAGEE1
508	0.0005102	0.0122	0.0003	86.69	79.76	1.09	ILMN_1742779	CENPL
509	0.0005104	0.0122	0.0004	300.14	271.96	1.1	ILMN_2126344	SEC16A
510	0.000513	0.0123	0.0008	261.74	230.68	1.13	ILMN_1757872	DKFZp761P0423
511	0.0005146	0.0123	0.0006	86.55	77.95	1.11	ILMN_3203126	LOC100131662
512	0.0005207	0.0124	0.0002	161.46	175.96	0.92	ILMN_2387285	MSL3
513	0.0005259	0.0125	0.0005	163.46	147.84	1.11	ILMN_1676759	DDX27
514	0.000528	0.0125	0.0003	67.45	61.84	1.09	ILMN_3236408	SCARNA5
515	0.0005281	0.0125	0.0002	219.7	316.38	0.69	ILMN_2261600	FCGR1B
516	0.0005294	0.0125	0.0004	216.87	236.07	0.92	ILMN_1807492	LOC643668
517	0.0005308	0.0125	0.0001	913.05	822.6	1.11	ILMN_2395728	HNRPUL1
518	0.0005311	0.0125	0.0007	117.2	107.31	1.09	ILMN_1655225	C19orf25
519	0.000532	0.0125	0.0005	707.32	822.18	0.86	ILMN_3211463	LOC644037
520	0.0005328	0.0125	0.0004	141.59	153.05	0.93	ILMN_3235340	ACER2
521	0.0005365	0.0126	0.0002	1144.06	1278.16	0.9	ILMN_3227563	LOC729255
522	0.000542	0.0126	0.0002	221.04	186.45	1.19	ILMN_2331544	MBP
523	0.0005423	0.0126	0.0006	54.02	58.36	0.93	ILMN_3226324	NCRNA00081
524	0.0005429	0.0126	0.0006	246.89	222.25	1.11	ILMN_1698463	ILF3
525	0.0005544	0.0129	0.0008	185.51	220.81	0.84	ILMN_3203515	LOC401717
526	0.0005591	0.013	0.0003	100.23	89.9	1.11	ILMN_3203098	LOC400836
527	0.0005615	0.013	0.0006	1153.79	998.97	1.15	ILMN_2195821	C5orf41
528	0.0005618	0.013	0.0005	108.89	120.64	0.9	ILMN_2191759	LOC440396
529	0.0005635	0.013	< 1e-07	159.73	180.79	0.88	ILMN_3195815	LOC100130561
530	0.0005637	0.013	0.0003	5668.69	6639.18	0.85	ILMN_2402936	LOC440926
531	0.0005688	0.0131	0.0004	90.61	80.52	1.13	ILMN_1670878	YTHDC1
532	0.0005703	0.0131	0.0006	99.78	89.59	1.11	ILMN_1680757	LRRC26
533	0.0005734	0.0131	0.0009	49.76	55.61	0.89	ILMN_1694068	EFCAB2
534	0.0005757	0.0131	0.0006	1938.72	1753.31	1.11	ILMN_1767422	POLR1D
535	0.0005757	0.0131	0.0005	2263.33	2078.53	1.09	ILMN_1742238	SET
536	0.0005796	0.0131	0.0002	2564.58	2376.91	1.08	ILMN_2163306	FAM120A
537	0.0005802	0.0131	0.0003	139.89	128.42	1.09	ILMN_1680104	SLC35C1
538	0.0005809	0.0131	0.0002	178.33	197.71	0.9	ILMN_1741180	HEXDC
539	0.0005809	0.0131	0.0007	213.16	246.3	0.87	ILMN_3288783	LOC645693
540	0.0005815	0.0131	0.0005	50.22	54.67	0.92	ILMN_1757036	AQP12A
541	0.000582	0.0131	0.0008	153.43	141.21	1.09	ILMN_1714278	C9orf30
542	0.0005863	0.0132	0.0003	114.5	126.92	0.9	ILMN_3209631	LOC728060
543	0.0005958	0.0134	0.0004	2900.67	2543.33	1.14	ILMN_1744347	LOC127295
544	0.0005972	0.0134	0.0004	59.49	65.11	0.91	ILMN_1676118	LOC644964
545	0.0005993	0.0134	0.0001	157.14	175.32	0.9	ILMN_1716704	NLRC5
546	0.0006	0.0134	0.0004	83.75	69.71	1.2	ILMN_1797861	IL6ST
547	0.0006071	0.0135	0.0008	1944.23	1768.02	1.1	ILMN_1708416	ARL6IP1
548	0.000608	0.0135	0.0005	2269.84	2573.63	0.88	ILMN_1792138	UQCRH
549	0.0006098	0.0135	0.0003	123.4	111.15	1.11	ILMN_1668514	PIP5K1C
550	0.0006113	0.0135	0.0014	51.76	57.18	0.91	ILMN_2139061	COPS2
551	0.0006113	0.0135	0.0007	125.61	114.96	1.09	ILMN_1740395	RAVER1
552	0.000612	0.0135	0.0008	73.81	84.4	0.87	ILMN_1670748	GALNT7
553	0.0006133	0.0135	0.0009	330.76	293.47	1.13	ILMN_1708081	LCLAT1
554	0.0006246	0.0138	0.0009	93.93	83.94	1.12	ILMN_1715625	C20orf94
555	0.0006267	0.0138	0.0007	1652.58	1514.59	1.09	ILMN_1704286	FXYD5
556	0.0006282	0.0138	0.0011	113.25	128.85	0.88	ILMN_2124833	TRAT1
557	0.0006306	0.0138	0.0007	688.32	789.26	0.87	ILMN_1791466	HMGB1
558	0.0006345	0.0139	0.0003	64.04	69.71	0.92	ILMN_3293097	LOC645715
559	0.0006378	0.0139	0.0006	211.82	190.18	1.11	ILMN_2095133	SPTAN1
560	0.0006435	0.014	0.001	4832.71	4355.49	1.11	ILMN_1761155	PABPC1
561	0.0006448	0.014	0.0009	751.43	861.73	0.87	ILMN_3208014	LOC100131866
562	0.0006487	0.0141	0.0012	44.73	48.3	0.93	ILMN_1668924	BEGAIN
563	0.0006513	0.0141	0.0008	120.54	108.83	1.11	ILMN_1720431	ZNF420
564	0.0006515	0.0141	0.0004	554.35	497.2	1.11	ILMN_1767662	LASS6
565	0.0006516	0.0141	0.0003	144.82	134.15	1.08	ILMN_1660305	PDE12
566	0.0006534	0.0141	0.0006	88.53	104.41	0.85	ILMN_1671045	LOC439992
567	0.0006565	0.0141	0.0005	611.63	791.04	0.77	ILMN_1769229	BCL2A1
568	0.0006588	0.0141	0.0002	637.13	535.41	1.19	ILMN_1721842	RYBP
569	0.0006589	0.0141	0.0008	194.35	213.48	0.91	ILMN_2373073	LIG4
570	0.0006613	0.0142	0.0008	588.7	536.84	1.1	ILMN_1808356	FAM3A
571	0.0006659	0.0142	0.0006	152.97	169.99	0.9	ILMN_1759396	NNT
572	0.0006671	0.0142	0.0008	277.68	332.09	0.84	ILMN_2088990	CXorf21
573	0.000669	0.0142	0.0006	72.19	66.8	1.08	ILMN_1668185	ZNF282
574	0.000672	0.0143	0.0009	60.62	52.56	1.15	ILMN_1779071	FEZ1
575	0.0006738	0.0143	0.0005	143.11	132.67	1.08	ILMN_1902658
576	0.000678	0.0144	0.0005	138.15	111.58	1.24	ILMN_1776077	SF1
577	0.0006792	0.0144	0.0003	100.63	109.11	0.92	ILMN_3283244	LOC391334
578	0.0006944	0.0147	0.0007	263.53	298.2	0.88	ILMN_2373062	RHBDF2
579	0.0006954	0.0147	0.0005	748.28	807.67	0.93	ILMN_1676588	CEPT1
580	0.0006971	0.0147	0.0009	861.07	975.51	0.88	ILMN_2292387	TANK
581	0.0007018	0.0147	0.0009	1787.72	2158.83	0.83	ILMN_3231550	LOC100131718
582	0.0007044	0.0148	0.0004	72.41	67.23	1.08	ILMN_1665243	FKBP14
583	0.0007073	0.0148	0.0011	83.24	90.49	0.92	ILMN_3201658	LOC642585
584	0.0007109	0.0149	0.0006	1576.57	1434.6	1.1	ILMN_1687533	SEMA4D
585	0.0007147	0.0149	0.0008	1014.94	1233.19	0.82	ILMN_3211302	LOC646909
586	0.0007169	0.0149	0.0009	109.56	124.63	0.88	ILMN_3200070	LOC643534
587	0.000717	0.0149	0.001	130.88	107.42	1.22	ILMN_1772627	D4S234E
588	0.0007178	0.0149	0.0004	240.88	223.44	1.08	ILMN_1694111	PNKP
589	0.000718	0.0149	0.0008	83.52	76.37	1.09	ILMN_1814619	ZNF33A
590	0.0007218	0.0149	0.0009	4972.84	4377.73	1.14	ILMN_1700316	LOC440055
591	0.0007243	0.015	0.0012	390.67	349.46	1.12	ILMN_2410965	MRI1
592	0.0007339	0.0151	0.0007	889.42	808.83	1.1	ILMN_1679655	WDR82
593	0.0007353	0.0151	0.0009	100.99	112.49	0.9	ILMN_1824766
594	0.0007459	0.0153	0.0008	52.96	48.78	1.09	ILMN_2112915	DRD4
595	0.0007473	0.0153	0.0007	349.8	411.6	0.85	ILMN_1812250	LOC644642
596	0.0007548	0.0155	0.0009	123.56	113.43	1.09	ILMN_1853631
597	0.0007627	0.0156	0.0003	40.03	46.19	0.87	ILMN_1701914	CD274
598	0.000764	0.0156	0.0009	79.43	71.63	1.11	ILMN_1722206	MAF
599	0.000765	0.0156	0.0007	100.86	113.2	0.89	ILMN_1859007
600	0.0007655	0.0156	0.0006	170.97	191.96	0.89	ILMN_1724699	ACAD8
601	0.0007705	0.0156	0.0008	48.49	44.92	1.08	ILMN_1733983	LOC653316
602	0.0007717	0.0156	0.0005	134.18	148.05	0.91	ILMN_1790100	C11orf82
603	0.000775	0.0157	0.0006	130.17	151.34	0.86	ILMN_1778668	TAGLN
604	0.000777	0.0157	0.0009	233.75	215.67	1.08	ILMN_1709882	ICK
605	0.0007778	0.0157	0.0004	682.4	789.28	0.86	ILMN_3284177	LOC100132425
606	0.0007945	0.016	0.0005	87.8	80.33	1.09	ILMN_1825773
607	0.0007954	0.016	0.0005	141.57	172.09	0.82	ILMN_3187283	LOC100128460
608	0.0008001	0.0161	0.0012	224.67	208.4	1.08	ILMN_1736757	GNPTAB
609	0.0008041	0.0161	0.0003	2036.9	1881.85	1.08	ILMN_1772359	LAPTM5
610	0.0008066	0.0161	0.0002	147.33	171.12	0.86	ILMN_2372773	TANK
611	0.0008077	0.0161	0.0006	381.62	341.57	1.12	ILMN_1794677	TMC6
612	0.0008084	0.0161	0.0004	4589.71	4165.11	1.1	ILMN_2184184	ANXA1
613	0.0008098	0.0161	0.0007	86.03	95.75	0.9	ILMN_1704943	GPN3
614	0.0008129	0.0162	0.001	909.69	839.2	1.08	ILMN_1757343	PABPC4
615	0.000817	0.0162	0.001	125.22	108.71	1.15	ILMN_1660343	LOC653080
616	0.00082	0.0162	0.0007	117.08	104.32	1.12	ILMN_1721024	SRFBP1
617	0.0008263	0.0163	0.0009	83.83	76.26	1.1	ILMN_1724666	INADL
618	0.0008264	0.0163	0.0008	51.57	61.03	0.85	ILMN_1770071	IFITM4P
619	0.0008345	0.0165	0.0005	283.75	259.64	1.09	ILMN_2090397	ISG20L2
620	0.0008382	0.0165	0.0004	76.48	82.49	0.93	ILMN_1754532	LOC442517
621	0.0008392	0.0165	0.0004	150.26	168.24	0.89	ILMN_3248403	LOC100132717
622	0.0008453	0.0166	0.001	3283.73	2876.29	1.14	ILMN_1743078	LOC643031
623	0.0008488	0.0166	0.0012	67.15	73.6	0.91	ILMN_2050921	SNHG8
624	0.000854	0.0167	0.0002	386.48	468.8	0.82	ILMN_1703622	PPIB
625	0.0008568	0.0167	0.0009	321.76	395.13	0.81	ILMN_3208229	LOC642738
626	0.000857	0.0167	0.0009	194.24	176.69	1.1	ILMN_1725787	RFX1
627	0.0008595	0.0167	0.0006	948.47	865.55	1.1	ILMN_1651347	SERTAD2
628	0.0008719	0.0169	0.0006	302.69	263.91	1.15	ILMN_1791057	IFNAR2
629	0.000873	0.0169	0.0014	348.08	312.61	1.11	ILMN_1728984	PA2G4
630	0.0008767	0.017	0.0008	205.34	232.95	0.88	ILMN_3251944	LOC100130598
631	0.0008767	0.017	0.0012	304.29	337.44	0.9	ILMN_1691578	GTF3C6
632	0.0008868	0.0171	0.001	321.1	352.27	0.91	ILMN_3270542	LOC100128525
633	0.0008899	0.0172	0.0005	431.46	395.62	1.09	ILMN_2055634	TIAF1
634	0.0008915	0.0172	0.0006	2343.2	2171.15	1.08	ILMN_2362902	RASSF5
635	0.0008971	0.0172	0.0007	140.96	152.02	0.93	ILMN_3276005	LOC648283
636	0.0009088	0.0174	0.0008	209.22	236.26	0.89	ILMN_1726327	AMY1B
637	0.0009092	0.0174	0.0008	62.89	68.11	0.92	ILMN_2078074	MUT
638	0.0009153	0.0175	0.0004	66.81	62.15	1.07	ILMN_3237329	FNIP2
639	0.0009186	0.0175	0.0009	1431.93	1706.08	0.84	ILMN_2294762	AMY1A
640	0.000921	0.0176	0.0007	264.59	310.09	0.85	ILMN_2341645	HNRPH3
641	0.0009228	0.0176	0.0007	1298.88	1098.36	1.18	ILMN_3251404	NUCKS1
642	0.0009307	0.0177	0.0009	50.26	54.13	0.93	ILMN_1667224	SLAMF8
643	0.0009317	0.0177	0.0008	211.09	241.16	0.88	ILMN_3243334	LOC645762
644	0.0009368	0.0177	0.0012	245.7	280.06	0.88	ILMN_3291921	LOC645086
645	0.000937	0.0177	0.0007	551.22	512.5	1.08	ILMN_1721729	PPARBP
646	0.0009392	0.0177	0.0011	73.3	80.04	0.92	ILMN_1661888	MEF2A
647	0.0009438	0.0178	0.0012	261.44	241.25	1.08	ILMN_1811029	TLK1
648	0.0009493	0.0179	0.0008	227.55	270.05	0.84	ILMN_3199655	LOC646784
649	0.0009598	0.018	0.0009	46.95	43.63	1.08	ILMN_1696469	LOC648509
650	0.0009617	0.0181	0.0009	144.86	157.82	0.92	ILMN_1706593	PPHLN1
651	0.0009667	0.0181	0.0004	75.61	81.86	0.92	ILMN_3250049	SULT1A3
652	0.0009698	0.0181	0.0005	69.84	64.94	1.08	ILMN_1701644	PCDHGB6
653	0.0009703	0.0181	0.0008	5796.53	5168.82	1.12	ILMN_1680437	LOC731096
654	0.0009711	0.0181	0.0004	293.01	322.98	0.91	ILMN_2402806	TRPC4AP
655	0.0009865	0.0184	0.0011	166.94	181.66	0.92	ILMN_1682812	C21orf33
656	0.0009885	0.0184	0.001	74.81	83.65	0.89	ILMN_1803385	GOLGA8B
657	0.0009921	0.0184	0.0009	1271.93	1160.69	1.1	ILMN_3299520	PRKCB
658	0.001	0.0185	0.0011	127.16	118.36	1.07	ILMN_1666632	VPS52
659	0.0010135	0.0188	0.0012	2630.94	2185.83	1.2	ILMN_2079655	KLRB1
660	0.0010159	0.0188	0.0013	46.72	51.77	0.9	ILMN_1657591	SCN3A
661	0.0010169	0.0188	0.0013	71.76	66.73	1.08	ILMN_1705346	NBEA
662	0.0010218	0.0188	0.0009	166.61	152.26	1.09	ILMN_1776674	SAC3D1
663	0.001022	0.0188	0.0011	243.55	217.17	1.12	ILMN_2128967	C11orf1
664	0.0010231	0.0188	0.001	65.15	76.79	0.85	ILMN_3238525	CARD17
665	0.0010263	0.0188	0.0002	99.44	111.73	0.89	ILMN_2379695	XRCC4
666	0.0010289	0.0188	0.0013	54.73	59.07	0.93	ILMN_2070477	TAF8
667	0.0010289	0.0188	0.001	143.59	175.05	0.82	ILMN_3215715	LOC389386
668	0.0010353	0.0189	0.0017	199.86	241.8	0.83	ILMN_1722981	TLR5
669	0.0010392	0.019	0.0014	70.5	65.33	1.08	ILMN_1724581	EDC3
670	0.0010428	0.019	0.0017	10677.6	9929.04	1.08	ILMN_3208973	LOC653162
671	0.0010484	0.0191	0.0007	3113.13	2743.56	1.13	ILMN_3200299	LOC646942
672	0.0010497	0.0191	0.0011	72.31	64.29	1.12	ILMN_1767310	CXorf20
673	0.0010534	0.0191	0.0007	43.6	46.87	0.93	ILMN_2400935	TAGLN
674	0.0010572	0.0191	0.0008	7538.42	8208.28	0.92	ILMN_1685378	LOC728973
675	0.0010574	0.0191	0.0016	237.6	266.96	0.89	ILMN_2148452	BCAS2
676	0.0010686	0.0193	0.0011	1089.78	1008.44	1.08	ILMN_1764577	MFNG
677	0.0010811	0.0195	0.0016	896.44	774.77	1.16	ILMN_1719986	PIK3IP1
678	0.001084	0.0195	0.0005	99.23	106.72	0.93	ILMN_1757084	LOC642443
679	0.0010955	0.0197	0.0014	682.72	982.89	0.69	ILMN_2292178	CLEC12A
680	0.0010974	0.0197	0.001	70.83	76.99	0.92	ILMN_1792265	TRIM4
681	0.0011	0.0197	0.0014	434.65	395.47	1.1	ILMN_1804988	MOAP1
682	0.0011118	0.0199	0.0011	112.53	125.17	0.9	ILMN_3263007	LOC100129608
683	0.0011148	0.0199	0.0007	108.83	119.85	0.91	ILMN_2387742	HNRNPA1L2
684	0.001118	0.0199	0.0005	86.77	93.58	0.93	ILMN_1671183	LOC648749
685	0.0011334	0.0202	0.0009	218.98	250.34	0.87	ILMN_1766753	RBMS1
686	0.0011349	0.0202	0.001	2936.97	2691.7	1.09	ILMN_1727402	HCLS1
687	0.0011424	0.0203	0.0008	119.12	105.23	1.13	ILMN_1778886	ZNF345
688	0.0011442	0.0203	0.0011	84.82	74.25	1.14	ILMN_1690754	SVIL
689	0.0011444	0.0203	0.0012	46.18	42.46	1.09	ILMN_1712023	SLC8A3
690	0.0011491	0.0203	0.0014	170.11	149.3	1.14	ILMN_1743065	PTPLAD1
691	0.0011529	0.0203	0.001	3340.04	3020.23	1.11	ILMN_1738356	LOC402694
692	0.0011538	0.0203	0.0012	163.75	189.33	0.86	ILMN_1762808	LOC651919
693	0.0011589	0.0204	0.0014	290.46	268.05	1.08	ILMN_2318638	TGIF1
694	0.0011674	0.0205	0.0009	64.82	69.87	0.93	ILMN_1773236	LOC163233
695	0.0011717	0.0206	0.0011	1104.84	1025.11	1.08	ILMN_1697024	LOC730432
696	0.0011891	0.0208	0.0009	719.11	669.35	1.07	ILMN_1729509	C1orf43
697	0.0011953	0.0209	0.001	55.21	60.53	0.91	ILMN_1652464	TUBA3E
698	0.0011975	0.0209	0.0006	342.08	314.68	1.09	ILMN_1657495	MLEC
699	0.0012052	0.021	0.0008	68.33	79.73	0.86	ILMN_1707979	CARD17
700	0.0012101	0.0211	0.0014	104.62	95.89	1.09	ILMN_1811330	FAM134B
701	0.0012103	0.0211	0.0013	209.7	244.35	0.86	ILMN_3292572	LOC390183
702	0.0012126	0.0211	0.0013	157.25	141.08	1.11	ILMN_1809040	LDLRAP1
703	0.0012208	0.0212	0.0012	63.4	68.32	0.93	ILMN_2359096	SS18
704	0.0012224	0.0212	0.0015	678.59	617.87	1.1	ILMN_1797341	ARID1A
705	0.0012238	0.0212	0.0015	71.12	79.96	0.89	ILMN_3304691	LOC729366
706	0.001226	0.0212	0.0015	386.79	539.47	0.72	ILMN_2403228	CLEC12A
707	0.0012291	0.0212	0.0011	486.53	417.69	1.16	ILMN_2390821	THOC2
708	0.0012357	0.0213	0.001	598.01	540.55	1.11	ILMN_1745415	BBX
709	0.0012371	0.0213	0.0009	99.95	86.24	1.16	ILMN_1804279	PTPRC
710	0.0012434	0.0214	0.0005	169.68	139.03	1.22	ILMN_3297130	LOC729402
711	0.0012497	0.0214	0.0013	107.26	98.95	1.08	ILMN_1686562	KIF13B
712	0.0012605	0.0216	0.0017	10742	9929.58	1.08	ILMN_1688749	LOC400963
713	0.0012687	0.0217	0.0007	997.64	1086.29	0.92	ILMN_1753892	LOC654121
714	0.0012691	0.0217	0.0013	144.21	132.53	1.09	ILMN_3244929	LOC100133163
715	0.0012775	0.0218	0.0012	1169.63	1396.55	0.84	ILMN_3279935	LOC646909
716	0.001282	0.0218	0.0011	75.02	83.01	0.9	ILMN_1673329	CTAGE6
717	0.0012906	0.022	0.0009	72.42	66.78	1.08	ILMN_1701094	CLN8
718	0.0013007	0.0221	0.0012	74.59	81.84	0.91	ILMN_3289247	LOC400750
719	0.001304	0.0221	0.0007	59.43	64.07	0.93	ILMN_1716564	INTU
720	0.0013102	0.0222	0.0008	269.08	245.87	1.09	ILMN_1763228	MEF2D
721	0.0013154	0.0222	0.0009	376.48	408.53	0.92	ILMN_2353358	LGALS8
722	0.001317	0.0222	0.0014	122.93	144.31	0.85	ILMN_3278627	LOC391769
723	0.0013171	0.0222	0.0008	47.25	51.18	0.92	ILMN_1785804	ERVWE1
724	0.0013235	0.0223	0.0011	2024.32	2329.03	0.87	ILMN_1811909	LOC402221
725	0.0013283	0.0224	0.0011	259.8	236.1	1.1	ILMN_1785635	BRD3
726	0.0013314	0.0224	0.0015	448.73	407.61	1.1	ILMN_1676010	SP1
727	0.0013348	0.0224	0.001	118.59	128.98	0.92	ILMN_2116811	C7orf70
728	0.0013393	0.0224	0.001	668.58	612.83	1.09	ILMN_1764177	JARID2
729	0.0013508	0.0226	0.0016	670.28	613.35	1.09	ILMN_1683044	PPP1R2
730	0.0013581	0.0227	0.0013	6558.93	5986.5	1.1	ILMN_3279306	LOC100132742
731	0.0013602	0.0227	0.0015	146.95	132.92	1.11	ILMN_3240721	LOC645233
732	0.0013637	0.0227	0.0014	57.52	62.64	0.92	ILMN_2159044	PDF
733	0.0013642	0.0227	0.0008	738.89	658.99	1.12	ILMN_1734742	ARHGDIA
734	0.001365	0.0227	0.0011	143.43	156.78	0.91	ILMN_2057220	HRSP12
735	0.0013701	0.0227	0.0012	746.2	878.88	0.85	ILMN_3289730	LOC100132199
736	0.0013706	0.0227	0.0012	1029.07	1219.13	0.84	ILMN_3304203	LOC729342
737	0.0013746	0.0228	0.0011	281.17	261.92	1.07	ILMN_1755727	KDM5B
738	0.0013773	0.0228	0.0011	447.48	480.94	0.93	ILMN_1755075	IDI1
739	0.0013782	0.0228	0.0009	125.05	116.48	1.07	ILMN_2106227	KIAA2026
740	0.0013903	0.0229	0.0018	117.05	127.74	0.92	ILMN_1692779	PRPF39
741	0.0013939	0.023	0.0017	8320.18	7760.9	1.07	ILMN_1674069	TOMM7
742	0.0014061	0.0231	0.0015	102.69	93.11	1.1	ILMN_1866216
743	0.001408	0.0231	0.0014	576.36	527.01	1.09	ILMN_2403247	CMTM7
744	0.0014162	0.0232	0.0019	73.12	63.84	1.15	ILMN_1863099
745	0.0014167	0.0232	0.0015	75.68	68.32	1.11	ILMN_1699695	TNFRSF21
746	0.0014171	0.0232	0.001	162.28	183.49	0.88	ILMN_1737498	MLKL
747	0.0014224	0.0232	0.0012	253.24	227.62	1.11	ILMN_2259633	MLL5
748	0.0014245	0.0232	0.0009	329.45	289.51	1.14	ILMN_1708016	C20orf108
749	0.0014288	0.0233	0.0014	258.51	300.05	0.86	ILMN_1709891	LOC647074
750	0.0014403	0.0234	0.0014	131.76	122.56	1.08	ILMN_1703955	FBXO32
751	0.0014456	0.0235	0.001	54.2	60.33	0.9	ILMN_2409078	SNHG10
752	0.0014476	0.0235	0.0012	515.54	479.17	1.08	ILMN_1781680	DAP3
753	0.0014594	0.0236	0.0014	135.03	150.32	0.9	ILMN_1776778	PARP15
754	0.0014615	0.0237	0.0012	75.21	68.94	1.09	ILMN_1764694	ZFP14
755	0.0014663	0.0237	0.0014	1134.55	1018.1	1.11	ILMN_1761159	ESYT1
756	0.001468	0.0237	0.0009	92.84	81.83	1.13	ILMN_1741406	HOOK1
757	0.0014774	0.0238	0.001	726.09	825.93	0.88	ILMN_3291413	LOC646672
758	0.0014852	0.0239	0.0019	2383.76	2212.06	1.08	ILMN_2076640	KHDRBS1
759	0.0014937	0.024	0.0018	41.16	38.36	1.07	ILMN_1849134
760	0.0014969	0.024	0.0016	87.36	104.1	0.84	ILMN_2059606	CCDC117
761	0.001499	0.024	0.0009	70.32	64.49	1.09	ILMN_1714352	DMWD
762	0.0015002	0.024	0.0009	92.3	104.69	0.88	ILMN_1784380	DTX3L
763	0.0015155	0.0242	0.0015	308.5	358.94	0.86	ILMN_1898771
764	0.0015175	0.0242	0.0017	83.68	72.12	1.16	ILMN_1806721	MS4A2
765	0.0015259	0.0243	0.0019	262.35	286.57	0.92	ILMN_2316104	IQCB1
766	0.0015387	0.0245	0.0012	302.3	261.34	1.16	ILMN_2243912	RAB37
767	0.0015413	0.0245	0.0011	4039.22	3563.44	1.13	ILMN_3225784	LOC730029
768	0.0015562	0.0247	0.0015	62.52	71.16	0.88	ILMN_3270866	LOC100130255
769	0.0015592	0.0247	0.0017	558.71	603.97	0.93	ILMN_1757781	SAP30L
770	0.0015597	0.0247	0.001	47.29	51.98	0.91	ILMN_3310785	MIR1299
771	0.0015629	0.0247	0.0012	69.2	75.37	0.92	ILMN_2188533	CICK0721Q.1
772	0.0015715	0.0248	0.0014	107.69	118.27	0.91	ILMN_3200465	LOC100132724
773	0.0015717	0.0248	0.0015	58.44	54.18	1.08	ILMN_2330341	TCEAL4
774	0.0015722	0.0248	0.0023	344.7	319.14	1.08	ILMN_1816713
775	0.0015806	0.0249	0.0015	73.97	65.5	1.13	ILMN_1663519	SLC24A3
776	0.0015836	0.0249	0.0014	358.61	388.64	0.92	ILMN_1682953	PGAM4
777	0.0015901	0.025	0.002	66.78	71.83	0.93	ILMN_3207722	LOC442181
778	0.0015992	0.025	0.0018	90.13	83.1	1.08	ILMN_1774973	SNORD21
779	0.0016007	0.025	0.002	52.05	48.13	1.08	ILMN_1748450	TAL1
780	0.0016012	0.025	0.0019	108.3	116.97	0.93	ILMN_1738909	TROVE2
781	0.0016042	0.025	0.002	108.47	95.53	1.14	ILMN_1680928	DNM3
782	0.0016052	0.025	0.0013	6716.17	6237.19	1.08	ILMN_3227912	LOC728576
783	0.0016073	0.025	0.0015	378.66	344.9	1.1	ILMN_1764500	C3orf10
784	0.0016177	0.0252	0.0015	42.18	46.41	0.91	ILMN_2381468	TFEC
785	0.0016228	0.0252	0.0014	303.29	259.3	1.17	ILMN_2083469	IRS2
786	0.0016254	0.0252	0.0014	820.32	737.52	1.11	ILMN_1809583	CREBBP
787	0.001635	0.0253	0.0009	516.33	434.66	1.19	ILMN_1742332	KCTD12
788	0.0016446	0.0254	0.0013	286.35	256.82	1.11	ILMN_1694589	PAQR8
789	0.0016489	0.0254	0.0018	299.44	326.73	0.92	ILMN_1738921	ACAA1
790	0.0016499	0.0254	0.0025	77.81	87.54	0.89	ILMN_3188806	LOC100127893
791	0.0016527	0.0254	0.0011	66.86	62.07	1.08	ILMN_1737833	ATN1
792	0.0016528	0.0254	0.0013	857.05	993.78	0.86	ILMN_2183216	TTRAP
793	0.0016532	0.0254	0.0015	265.23	244.89	1.08	ILMN_1737535	TAF4
794	0.0016577	0.0255	0.0018	81.98	76.26	1.07	ILMN_1737965	ELOVL4
795	0.0016632	0.0255	0.0013	162.24	174.24	0.93	ILMN_3251227	TBC1D22A
796	0.0016715	0.0256	0.0022	697.52	640.25	1.09	ILMN_1712687	PAK2
797	0.0016767	0.0256	0.0015	1177	1266.86	0.93	ILMN_2182120	SF3B14
798	0.0016782	0.0256	0.0012	372.97	418.8	0.89	ILMN_1748968	ATG10
799	0.001679	0.0256	0.002	922.37	1274.88	0.72	ILMN_1663142	CLEC12A
800	0.0016906	0.0258	0.0019	245.56	217.68	1.13	ILMN_1661599	DDIT4
801	0.0016945	0.0258	0.0012	69.24	77.84	0.89	ILMN_2071405	FBXL3
802	0.0017043	0.0259	0.002	154.17	170.83	0.9	ILMN_2229950	MPHOSPH10
803	0.0017081	0.026	0.0015	194.9	218.45	0.89	ILMN_2363027	RAD51
804	0.0017106	0.026	0.002	372.18	432.37	0.86	ILMN_1690894	TRA1P2
805	0.0017285	0.0262	0.0021	678.87	632.28	1.07	ILMN_1804328	WWP1
806	0.0017364	0.0263	0.0007	321.15	378.04	0.85	ILMN_1732039	DDX3Y
807	0.0017619	0.0266	0.0008	1568.08	1368.01	1.15	ILMN_1668526	GVIN1
808	0.0017716	0.0268	0.0016	657.26	813.51	0.81	ILMN_2053527	PARP9
809	0.0017864	0.0269	0.0022	248.37	312.67	0.79	ILMN_1663119	DSC2
810	0.0017924	0.027	0.0017	111.24	120.57	0.92	ILMN_2355004	HMGN3
811	0.0017936	0.027	0.002	82.72	76.7	1.08	ILMN_3244574	KIAA1430
812	0.0017997	0.027	0.0019	122.93	134.34	0.92	ILMN_2077733	C12orf30
813	0.0018005	0.027	0.0011	569.98	521.08	1.09	ILMN_3235808	POM121C
814	0.0018099	0.0271	0.0015	245.59	227.22	1.08	ILMN_1666050	TMUB1
815	0.001812	0.0271	0.0014	78.78	69.33	1.14	ILMN_3209358	LOC646836
816	0.0018272	0.0273	0.002	217.21	247.31	0.88	ILMN_1698243	C1orf85
817	0.0018301	0.0273	0.0019	125.2	115.76	1.08	ILMN_1836958
818	0.0018315	0.0273	0.0012	362.56	313.54	1.16	ILMN_2415898	DNAJB14
819	0.0018351	0.0273	0.002	457.63	408.75	1.12	ILMN_1670028	LPIN2
820	0.0018379	0.0273	0.0015	126.68	117.53	1.08	ILMN_1794213	ABHD14A
821	0.0018434	0.0274	0.0024	100.94	93.84	1.08	ILMN_1782829	GLTSCR1
822	0.0018526	0.0275	0.0009	339.28	314.7	1.08	ILMN_1754865	LOC400455
823	0.0018747	0.0278	0.0022	77.6	87.87	0.88	ILMN_1666785	SYNE1
824	0.00188	0.0278	0.0029	65.75	61.03	1.08	ILMN_1804955	CTSF
825	0.0019047	0.0282	0.0012	608.62	554.21	1.1	ILMN_1662130	LOC730316
826	0.0019148	0.0282	0.0017	175.38	155.83	1.13	ILMN_1756006	ATG2A
827	0.0019155	0.0282	0.002	509.17	458.85	1.11	ILMN_1714433	MARCKSL1
828	0.0019163	0.0282	0.0019	149.58	137.73	1.09	ILMN_1761764	ALKBH7
829	0.0019178	0.0282	0.0019	1593.82	1836.13	0.87	ILMN_1710937	IFI16
830	0.0019361	0.0284	0.0024	134.39	155.88	0.86	ILMN_1690443	C14orf82
831	0.0019383	0.0284	0.0018	62.38	68.22	0.91	ILMN_2347999	IFNAR2
832	0.0019385	0.0284	0.0022	329.41	399.92	0.82	ILMN_3223126	TYMP
833	0.00194	0.0284	0.0017	47.34	43.44	1.09	ILMN_1749646	LOC650737
834	0.0019421	0.0284	0.0022	70.69	84.68	0.83	ILMN_2214232	AIM2
835	0.0019529	0.0285	0.002	200.59	166.59	1.2	ILMN_1776640	MPL
836	0.0019533	0.0285	0.0018	62.43	56.28	1.11	ILMN_1703053	ZFP91
837	0.0019544	0.0285	0.002	441.39	508.94	0.87	ILMN_1785821	TTRAP
838	0.0019613	0.0285	0.0019	110.98	121.63	0.91	ILMN_3201895	LOC100132086
839	0.0019613	0.0285	0.0019	140.96	128.74	1.09	ILMN_2152465	PIP5K2A
840	0.0019748	0.0286	0.0027	229.12	251.46	0.91	ILMN_1708345	DNTTIP2
841	0.0019752	0.0286	0.0021	801.45	724.54	1.11	ILMN_3200322	LOC387791
842	0.0019759	0.0286	0.0013	214.58	192.75	1.11	ILMN_1748578	RAD21
843	0.0019762	0.0286	0.0015	70.26	78.47	0.9	ILMN_2270299	TP53BP2
844	0.0019787	0.0286	0.0018	69.19	60.35	1.15	ILMN_1752755	VWF
845	0.0019831	0.0286	0.0021	45.03	41.69	1.08	ILMN_2399016	MMP28
846	0.0019836	0.0286	0.0024	4785.11	4462.07	1.07	ILMN_2312296	PCBP2
847	0.0019848	0.0286	0.0019	4290.16	3943.73	1.09	ILMN_1788604	WBP2
848	0.001995	0.0287	0.0016	99.24	91.21	1.09	ILMN_1727996	BAG4
849	0.002001	0.0288	0.0019	266.83	292.3	0.91	ILMN_2063584	CLIC4
850	0.0020135	0.0289	0.0012	45.91	49.38	0.93	ILMN_1761321	KREMEN2
851	0.0020223	0.029	0.0021	340.22	299.59	1.14	ILMN_1670532	GMCL1
852	0.0020357	0.0291	0.0024	628.63	586.59	1.07	ILMN_2326997	DHPS
853	0.0020362	0.0291	0.0015	700.66	794.74	0.88	ILMN_2273224	SLC4A5
854	0.0020397	0.0291	0.0022	205.01	180.01	1.14	ILMN_1675387	LIMS1
855	0.0020519	0.0293	0.0023	82.17	88.13	0.93	ILMN_3224758	LOC92755
856	0.0020548	0.0293	0.0018	67.53	74.18	0.91	ILMN_3205364	LOC400389
857	0.0020581	0.0293	0.002	1333.4	1217.79	1.09	ILMN_1665717	EIF2S3
858	0.0020662	0.0294	0.0015	78.99	71.61	1.1	ILMN_1767541	ARAP2
859	0.0020887	0.0297	0.0021	370.07	335.7	1.1	ILMN_1670841	CPNE1
860	0.0021018	0.0298	0.0022	204.78	190.7	1.07	ILMN_1722662	RAD23B
861	0.0021024	0.0298	0.0011	120.46	133.07	0.91	ILMN_2347193	GSDMB
862	0.0021037	0.0298	0.0017	2346.24	2101.01	1.12	ILMN_1762725	EIF3L
863	0.0021069	0.0298	0.002	7663.92	7118.67	1.08	ILMN_3291098	LOC643531
864	0.0021104	0.0298	0.002	8053.13	7452.67	1.08	ILMN_2318725	EEF1B2
865	0.0021167	0.0299	0.0017	56.43	51.19	1.1	ILMN_1727671	SSH1
866	0.0021302	0.03	0.0016	61.85	66.17	0.93	ILMN_1677353	LOC652274
867	0.0021318	0.03	0.0025	277.5	248.9	1.11	ILMN_1762262	PKIA
868	0.0021412	0.0301	0.002	214.12	195.22	1.1	ILMN_1768391	ARL4C
869	0.0021452	0.0301	0.0011	456.47	417.96	1.09	ILMN_1786920	JARID1A
870	0.0021461	0.0301	0.0011	52.94	57.21	0.93	ILMN_1679897	IGFL3
871	0.0021462	0.0301	0.0016	175.03	188.4	0.93	ILMN_1773886	MED21
872	0.0021484	0.0301	0.0022	53.64	57.98	0.93	ILMN_2387452	MBD2
873	0.0021702	0.0303	0.0022	52.27	48.85	1.07	ILMN_1677509	PRR7
874	0.0021763	0.0304	0.0011	4599.39	4274.79	1.08	ILMN_2099301	UNC84B
875	0.0021837	0.0305	0.0019	259.42	293.5	0.88	ILMN_3228529	TMEM191A
876	0.0021868	0.0305	0.0019	55.14	51.5	1.07	ILMN_2325185	TYSND1
877	0.0022023	0.0306	0.002	167.03	187.81	0.89	ILMN_3187479	LOC100129982
878	0.0022029	0.0306	0.0022	46.53	50.02	0.93	ILMN_3247458	LOC652750
879	0.0022278	0.0309	0.0024	501.55	457.42	1.1	ILMN_2255579	RAB37
880	0.0022295	0.0309	0.0026	319.34	298.65	1.07	ILMN_1688629	ZNF274
881	0.0022532	0.0312	0.0018	183.32	159.11	1.15	ILMN_1824362
882	0.0022928	0.0317	0.0016	199.77	221.22	0.9	ILMN_1712357	HNRPK
883	0.0023021	0.0318	0.0018	297.4	259.31	1.15	ILMN_2278636	CUTL1
884	0.002311	0.0319	0.0024	53.86	50.38	1.07	ILMN_1800530	CENTG2
885	0.0023132	0.0319	0.0025	214.41	234.89	0.91	ILMN_1687036	MRPL47
886	0.0023199	0.0319	0.0022	74.13	65.39	1.13	ILMN_1662038	LARGE
887	0.0023322	0.0321	0.0021	201.25	232.1	0.87	ILMN_1779852	LOC387934
888	0.0023427	0.0322	0.0022	85.87	93.06	0.92	ILMN_3179844	LOC100129426
889	0.0023475	0.0322	0.0025	100.26	119.96	0.84	ILMN_2331121	FCGR2C
890	0.0023475	0.0322	0.0025	557.43	605.29	0.92	ILMN_1755926	DBI
891	0.0023888	0.0327	0.0026	1668.73	1535.26	1.09	ILMN_1726245	TGFBR2
892	0.0024103	0.033	0.0019	42.27	38.88	1.09	ILMN_2291455	FAM102A
893	0.0024138	0.033	0.0021	163.64	152.8	1.07	ILMN_1788347	KIAA1737
894	0.0024158	0.033	0.0023	107.44	117.26	0.92	ILMN_2069821	C4orf32
895	0.0024245	0.0331	0.0033	66.86	72.43	0.92	ILMN_1798372	ANXA2P3
896	0.0024382	0.0332	0.0029	112.89	104.21	1.08	ILMN_1724708	RAB33A
897	0.002444	0.0332	0.0018	523.26	570.38	0.92	ILMN_3240177	LLPH
898	0.0024564	0.0334	0.0029	204.01	230.29	0.89	ILMN_2205470	FAM153B
899	0.0024599	0.0334	0.002	310.59	257.57	1.21	ILMN_1723944	TARP
900	0.0024709	0.0335	0.0023	135.47	125.58	1.08	ILMN_2070896	BMPR2
901	0.0024786	0.0336	0.002	974.44	902.63	1.08	ILMN_1706057	CS
902	0.0024949	0.0337	0.0034	70.66	63.49	1.11	ILMN_1708916	PDZD4
903	0.0024973	0.0337	0.0024	1787.97	1641.15	1.09	ILMN_1739335	LOC400948
904	0.0024986	0.0337	0.0035	886.02	820.25	1.08	ILMN_1681304	PAN3
905	0.0024995	0.0337	0.0025	183.13	211.38	0.87	ILMN_1746919	LOC643882
906	0.0025044	0.0337	0.003	98.25	87.1	1.13	ILMN_3237446	SCARNA16
907	0.0025057	0.0337	0.0025	203.56	243.54	0.84	ILMN_3297126	TYMP
908	0.0025083	0.0337	0.0026	43.6	49.21	0.89	ILMN_1772697	KREMEN1
909	0.0025156	0.0337	0.0018	343.21	373.85	0.92	ILMN_2356654	LGALS8
910	0.0025176	0.0337	0.0021	306.02	279.1	1.1	ILMN_1700432	ITPKB
911	0.0025182	0.0337	0.002	303.76	284.1	1.07	ILMN_2073010	TMEM203
912	0.0025199	0.0337	0.0025	76.47	90.3	0.85	ILMN_1687960	LIMK2
913	0.0025272	0.0338	0.0024	11514.1	10728.1	1.07	ILMN_3283573	LOC647276
914	0.0025297	0.0338	0.0019	587.45	527.29	1.11	ILMN_1739805	NDE1
915	0.002533	0.0338	0.0029	66	70.76	0.93	ILMN_1794072	B3GAT1
916	0.002544	0.0339	0.003	119.35	132.76	0.9	ILMN_1696935	RBM39
917	0.0025541	0.034	0.0019	75.43	68.68	1.1	ILMN_1694730	RNPEPL1
918	0.0025572	0.034	0.0013	534.24	492.59	1.08	ILMN_1766408	CBFB
919	0.0025627	0.034	0.0022	106	98.99	1.07	ILMN_1800796	RPL37
920	0.0025692	0.0341	0.0028	866.71	770.63	1.12	ILMN_1785202	STAT4
921	0.002573	0.0341	0.0015	62.03	56.57	1.1	ILMN_1651712	RBM11
922	0.0025753	0.0341	0.0022	5579.03	5138.27	1.09	ILMN_1656662	LOC731365
923	0.0025853	0.0342	0.003	653.45	698.14	0.94	ILMN_2048636	ME2
924	0.002588	0.0342	0.0028	1313.15	1203.18	1.09	ILMN_1699208	NAP1L1
925	0.002591	0.0342	0.0034	1642.21	1512.08	1.09	ILMN_1693145	BUB3
926	0.002599	0.0342	0.0018	155.73	142.04	1.1	ILMN_2372398	ALDH5A1
927	0.0026055	0.0343	0.0026	173.29	161.57	1.07	ILMN_1661622	TBC1D7
928	0.002623	0.0345	0.003	125.74	117.39	1.07	ILMN_1716480	ACD
929	0.0026257	0.0345	0.003	296.5	328.78	0.9	ILMN_2327090	MAEA
930	0.0026464	0.0347	0.0018	376.9	405.92	0.93	ILMN_3301451	LOC729200
931	0.0026505	0.0347	0.0025	520.26	563.06	0.92	ILMN_2076250	GPBP1L1
932	0.0026597	0.0348	0.0025	698.14	781.17	0.89	ILMN_1672947	CAST
933	0.0026666	0.0349	0.0029	53.73	57.67	0.93	ILMN_3191922	KRT8P9
934	0.0026737	0.0349	0.0023	108.63	98.81	1.1	ILMN_1818617
935	0.0026763	0.0349	0.0028	73.88	68.01	1.09	ILMN_1783231	PLEKHB1
936	0.0026869	0.035	0.0021	77.63	70.35	1.1	ILMN_2198239	HGD
937	0.0027208	0.0354	0.0032	69.83	64.12	1.09	ILMN_1791006	AHI1
938	0.0027382	0.0356	0.0021	77.41	71.74	1.08	ILMN_1762787	RNF26
939	0.0027463	0.0357	0.0021	429.67	389.91	1.1	ILMN_2354478	CYFIP2
940	0.0027638	0.0359	0.0027	117.81	106.14	1.11	ILMN_1684346	TNFAIP8L1
941	0.0027659	0.0359	0.002	77.14	71.09	1.09	ILMN_1778064	FICD
942	0.0027774	0.036	0.0025	110.73	102.86	1.08	ILMN_1879480
943	0.0027992	0.0362	0.0033	80.87	73.7	1.1	ILMN_1763852	ACACB
944	0.0028045	0.0363	0.0024	216.11	197.86	1.09	ILMN_2097790	C1orf86
945	0.0028243	0.0365	0.0024	189.97	171.07	1.11	ILMN_1702759	TMX4
946	0.0028308	0.0365	0.0027	68.38	63.51	1.08	ILMN_1790160	KIT
947	0.0028524	0.0368	0.0027	676.4	769.02	0.88	ILMN_3200597	LOC441154
948	0.0028579	0.0368	0.002	795.49	716.7	1.11	ILMN_1827736
949	0.0028693	0.0369	0.0025	402	368.93	1.09	ILMN_1721138	GRPEL2
950	0.0028741	0.0369	0.0021	217.89	198.13	1.1	ILMN_1784577	ZNF12
951	0.0028757	0.0369	0.0022	92.85	85.88	1.08	ILMN_1911503
952	0.0028764	0.0369	0.0035	58.78	63.65	0.92	ILMN_3225449	LOC729677
953	0.0028819	0.0369	0.0019	59.21	63.63	0.93	ILMN_1652164	LOC729196
954	0.0028834	0.0369	0.0032	152.89	164.13	0.93	ILMN_2413264	SOCS4
955	0.0028889	0.0369	0.0033	73.51	81.8	0.9	ILMN_1746428	RGPD1
956	0.002917	0.0372	0.0024	76.91	82.91	0.93	ILMN_2171783	CPEB3
957	0.0029206	0.0372	0.0022	595.54	556.12	1.07	ILMN_1815051	API5
958	0.002922	0.0372	0.0032	988.24	1105.69	0.89	ILMN_1679280	LOC643997
959	0.0029238	0.0372	0.0036	1140.6	1015.2	1.12	ILMN_1787461	RUNX3
960	0.0029241	0.0372	0.0027	159.65	146.41	1.09	ILMN_2133638	DULLARD
961	0.0029259	0.0372	0.0027	184.42	172.4	1.07	ILMN_2182335	ARID2
962	0.0029447	0.0374	0.0029	82.48	74.91	1.1	ILMN_1702501	RPS6KA2
963	0.00295	0.0374	0.0028	141.33	162.2	0.87	ILMN_3309514	MIR574
964	0.0029604	0.0375	0.0021	118.69	108.73	1.09	ILMN_2405628	TOP1MT
965	0.0029656	0.0375	0.0025	163.93	177.77	0.92	ILMN_2357193	DDX59
966	0.0029694	0.0375	0.0031	364.47	421.63	0.86	ILMN_1798270	C11orf75
967	0.0029731	0.0375	0.0029	819.72	948.37	0.86	ILMN_1791912	SIDT2
968	0.0029877	0.0377	0.0031	1141.69	1222.64	0.93	ILMN_2232121	GPR65
969	0.003	0.0378	0.0025	569.58	624.15	0.91	ILMN_2180239	DOPEY2
970	0.0030131	0.0379	0.0037	83.38	97.25	0.86	ILMN_1674985	TMEM51
971	0.0030338	0.0381	0.0026	189.26	165.05	1.15	ILMN_1703558	FHL3
972	0.0030403	0.0382	0.0039	177	153.39	1.15	ILMN_1769575	JAM3
973	0.0030449	0.0382	0.0025	77.65	72.38	1.07	ILMN_1792660	CAMSAP1L1
974	0.0030463	0.0382	0.0034	137.56	126.55	1.09	ILMN_2360291	UGCGL1
975	0.0030539	0.0382	0.0033	62.74	58.02	1.08	ILMN_2335754	CD1E
976	0.0030553	0.0382	0.0032	218.3	202.45	1.08	ILMN_1797903	ZNF544
977	0.0030561	0.0382	0.0023	115.04	127.24	0.9	ILMN_2375141	C10orf4
978	0.0030813	0.0384	0.0027	111.93	127.23	0.88	ILMN_2112460	MAD2L1
979	0.0030815	0.0384	0.0026	137.42	150.22	0.91	ILMN_3258027	LOC100128291
980	0.0030849	0.0384	0.0032	64.11	59.23	1.08	ILMN_1672120	KRT73
981	0.0030991	0.0385	0.0036	80.79	88.16	0.92	ILMN_3304396	LOC730202
982	0.0031002	0.0385	0.0029	146.05	162.53	0.9	ILMN_1728392	LOC255809
983	0.0031374	0.0389	0.0032	128.18	137.87	0.93	ILMN_1666553	SLC25A19
984	0.0031417	0.039	0.0034	3173.17	2867.81	1.11	ILMN_1752285	RPL4
985	0.0031564	0.0391	0.0028	146.86	136.9	1.07	ILMN_1668027	LOC727762
986	0.0031625	0.0391	0.0035	100.03	93.25	1.07	ILMN_1698019	LGMN
987	0.0031752	0.0393	0.0036	1129.06	1034.13	1.09	ILMN_1712390	CUTA
988	0.0031873	0.0394	0.0039	71.35	66.35	1.08	ILMN_1815319	CMTM4
989	0.0031998	0.0395	0.0023	77.36	72.47	1.07	ILMN_1910550
990	0.0032077	0.0395	0.0019	131.88	121.75	1.08	ILMN_1670807	FAM84B
991	0.0032141	0.0396	0.0022	6257.92	5667.88	1.1	ILMN_3296979	LOC730187
992	0.0032219	0.0396	0.0034	126.12	136.48	0.92	ILMN_2135991	C16orf69
993	0.003237	0.0398	0.0036	73.44	79.66	0.92	ILMN_2348259	ZNF92
994	0.0032556	0.04	0.0032	201.79	184.69	1.09	ILMN_1670561	TCEAL8
995	0.0032619	0.04	0.0033	85.25	92.81	0.92	ILMN_2294442	SNURF
996	0.0032629	0.04	0.0041	493.38	462.09	1.07	ILMN_1745887	FBXO21
997	0.0032827	0.0401	0.0035	271.33	311.51	0.87	ILMN_1672009	LOC130773
998	0.0032837	0.0401	0.0028	94.49	87.33	1.08	ILMN_2168347	EPOR
999	0.003286	0.0401	0.0043	61.87	58.01	1.07	ILMN_1915553
1000	0.0032904	0.0401	0.0026	70.11	75.53	0.93	ILMN_2396148	HIP1R
1001	0.0033105	0.0404	0.0042	70.29	78.12	0.9	ILMN_1709075	OLA1
1002	0.003318	0.0404	0.0037	60.27	64.44	0.94	ILMN_3200565	LOC643015
1003	0.0033287	0.0405	0.0036	2007.31	1803.91	1.11	ILMN_2079386	RPL22
1004	0.0033524	0.0407	0.0037	3649.94	3373.54	1.08	ILMN_1796712	S100A10
1005	0.0033573	0.0408	0.0029	129.47	139.76	0.93	ILMN_2412101	PRKAG1
1006	0.0033728	0.0409	0.003	192.32	207.81	0.93	ILMN_2366710	UCRC
1007	0.0033819	0.0409	0.004	57.11	63.72	0.9	ILMN_1789781	PIM3
1008	0.0033823	0.0409	0.0035	51.23	47.75	1.07	ILMN_2069060	RBM11
1009	0.0034045	0.0411	0.0037	176	198.13	0.89	ILMN_1656424	SNRPE
1010	0.0034052	0.0411	0.0027	62.07	66.28	0.94	ILMN_1797668	INSM1
1011	0.0034208	0.0413	0.0039	55.89	62.72	0.89	ILMN_3285356	LOC645944
1012	0.0034296	0.0414	0.0033	69.88	65.16	1.07	ILMN_1899760
1013	0.0034388	0.0414	0.0034	74.23	79.15	0.94	ILMN_1862302	TMF1
1014	0.0034633	0.0417	0.0028	316.03	343.96	0.92	ILMN_1657884	NME2
1015	0.0034692	0.0417	0.004	248.45	229.25	1.08	ILMN_1772876	ZNF395
1016	0.0034806	0.0418	0.0025	157.42	174.36	0.9	ILMN_2398274	PYCARD
1017	0.0034816	0.0418	0.0032	86.24	78.61	1.1	ILMN_1746579	UBE2O
1018	0.0035043	0.042	0.0028	102.95	110.16	0.93	ILMN_1747697	CHML
1019	0.0035068	0.042	0.0033	227.14	245.96	0.92	ILMN_2128923	HCCS
1020	0.0035181	0.0421	0.0042	315.45	341.22	0.92	ILMN_3243419	LOC100130715
1021	0.0035251	0.0421	0.0038	1895.26	1768.08	1.07	ILMN_1782890	SLC25A3
1022	0.0035254	0.0421	0.003	1127.93	1041.39	1.08	ILMN_2405018	PPP1CB
1023	0.0035533	0.0424	0.0027	75.79	71.03	1.07	ILMN_1763723	PTDSS2
1024	0.0035564	0.0424	0.004	56.91	61.62	0.92	ILMN_1721749	SNORD18C
1025	0.003584	0.0427	0.0024	70.39	75.47	0.93	ILMN_3248676	CBWD3
1026	0.0036154	0.0429	0.0034	54.83	64.31	0.85	ILMN_1654389	LOC728744
1027	0.0036155	0.0429	0.0039	346.56	443.39	0.78	ILMN_1762713	C19orf59
1028	0.0036169	0.0429	0.0032	111.44	120.3	0.93	ILMN_2297161	NCBP2
1029	0.0036181	0.0429	0.0022	296.84	323.74	0.92	ILMN_1692116	LOC650321
1030	0.0036593	0.0434	0.0034	122.25	112.9	1.08	ILMN_1789171	EEF2K
1031	0.003673	0.0435	0.0036	351.47	329.37	1.07	ILMN_1734153	GDI1
1032	0.0036759	0.0435	0.0042	45.98	49.73	0.92	ILMN_2064926	ITFG1
1033	0.0037141	0.0438	0.0036	428.88	399.5	1.07	ILMN_1746917	LOC729843
1034	0.0037154	0.0438	0.0036	76.19	67.47	1.13	ILMN_1676973	CABP5
1035	0.003716	0.0438	0.0042	136.07	126.58	1.07	ILMN_1795247	ARID2
1036	0.0037193	0.0438	0.0035	83.55	77.12	1.08	ILMN_1711368	TRAPPC9
1037	0.003724	0.0438	0.0039	110.81	121.04	0.92	ILMN_3245194	LOC100132323
1038	0.0037249	0.0438	0.0042	47.17	50.86	0.93	ILMN_1798053	41166
1039	0.0037313	0.0438	0.0036	223.38	262.01	0.85	ILMN_2204664	NBPF14
1040	0.0037362	0.0438	0.0028	63.31	71.39	0.89	ILMN_1670576	IRF5
1041	0.003737	0.0438	0.0031	372.05	343.17	1.08	ILMN_1782095	C20orf55
1042	0.0037449	0.0439	0.0044	180.19	164.6	1.09	ILMN_3262936	LCLAT1
1043	0.0037575	0.0439	0.0036	5298.77	4805.06	1.1	ILMN_3279675	LOC388339
1044	0.0037588	0.0439	0.0035	96.13	87.93	1.09	ILMN_1743966	BCL9L
1045	0.0037605	0.0439	0.005	119.8	111.31	1.08	ILMN_3236346	LOC100132901
1046	0.003771	0.044	0.0036	102.95	93.78	1.1	ILMN_1666546	DUSP14
1047	0.003791	0.0442	0.0037	368.02	415.77	0.89	ILMN_2113362	ARL6IP1
1048	0.0038174	0.0444	0.0039	305.14	283.97	1.07	ILMN_1801600	CCDC97
1049	0.0038221	0.0445	0.0041	89.31	83.45	1.07	ILMN_1697652	PLEKHB2
1050	0.003831	0.0445	0.0041	162.48	173.98	0.93	ILMN_1740487	CMTM7
1051	0.0038342	0.0445	0.003	179.23	200.89	0.89	ILMN_1765547	IRF2
1052	0.0038379	0.0445	0.0044	179.66	202.26	0.89	ILMN_3246544	OSTCL
1053	0.0038423	0.0445	0.0038	99	89.65	1.1	ILMN_1740197	ZNF234
1054	0.0038547	0.0446	0.0036	63.38	69.2	0.92	ILMN_2315964	PSRC1
1055	0.0038564	0.0446	0.0036	101.53	94.82	1.07	ILMN_2320480	LOC400464
1056	0.0038601	0.0446	0.0034	364.32	339.7	1.07	ILMN_1751571	RAD23A
1057	0.0038655	0.0446	0.003	184.45	173.15	1.07	ILMN_1728914	PRUNE
1058	0.003875	0.0447	0.0034	104.24	97.7	1.07	ILMN_1664098	FASTK
1059	0.0039063	0.045	0.0034	306.72	264.26	1.16	ILMN_2398939	MBP
1060	0.0039141	0.045	0.0037	62.72	58.12	1.08	ILMN_1808500	CEP68
1061	0.0039162	0.045	0.0032	7259.84	6672.39	1.09	ILMN_3284584	LOC390345
1062	0.0039172	0.045	0.0028	70.33	78.92	0.89	ILMN_3185204	LOC100127894
1063	0.003937	0.0452	0.0047	95.01	87.55	1.09	ILMN_3241441	MEGF6
1064	0.0039398	0.0452	0.0036	104.8	96.95	1.08	ILMN_1707943	C19orf39
1065	0.0039438	0.0452	0.0028	170.15	183.54	0.93	ILMN_1691104	PGAM4
1066	0.0039584	0.0453	0.0037	3583.44	3337.29	1.07	ILMN_2341363	ATP5A1
1067	0.0039683	0.0454	0.0031	61.74	56.64	1.09	ILMN_1764321	ACOT4
1068	0.0039764	0.0454	0.004	216.94	195.57	1.11	ILMN_2377109	LCK
1069	0.0039978	0.0456	0.0036	51.18	54.57	0.94	ILMN_3244405	LOC100134172
1070	0.0040128	0.0458	0.0033	66.83	71.49	0.93	ILMN_1674152	NFKBIB
1071	0.0040159	0.0458	0.0034	2890.94	2697.88	1.07	ILMN_1809957	AP2S1
1072	0.0040226	0.0458	0.0038	180.24	161.82	1.11	ILMN_1788538	NCALD
1073	0.0040376	0.0459	0.004	318.15	297.66	1.07	ILMN_1784320	ELMO1
1074	0.0040384	0.0459	0.0049	276.99	251.8	1.1	ILMN_2094952	NUAK2
1075	0.0040494	0.0459	0.0043	248.72	232.05	1.07	ILMN_2085722	ING2
1076	0.0040547	0.0459	0.003	7833.56	8673.15	0.9	ILMN_1706013	FTHL11
1077	0.0040554	0.0459	0.0036	91.4	79.05	1.16	ILMN_1694432	CRIP2
1078	0.0040624	0.046	0.0035	415.64	450.55	0.92	ILMN_1766718	LYSMD3
1079	0.0040654	0.046	0.0037	66.46	71.44	0.93	ILMN_1672987	LOC653596
1080	0.0040694	0.046	0.0024	33.93	37.42	0.91	ILMN_2340886	OTOF
1081	0.0040738	0.046	0.0044	53.39	57.18	0.93	ILMN_1682298	ERMN
1082	0.0040851	0.0461	0.0044	268.55	287.65	0.93	ILMN_1797933	MRPL17
1083	0.0040889	0.0461	0.0033	861.24	805.76	1.07	ILMN_1755364	RALA
1084	0.0040967	0.0461	0.0044	875.08	1000.94	0.87	ILMN_1709204	CLEC4A
1085	0.0040997	0.0461	0.0045	101.86	108.7	0.94	ILMN_1695961	CLK3
1086	0.0041311	0.0464	0.0036	657.09	610.77	1.08	ILMN_1656134	CNOT7
1087	0.0041428	0.0465	0.0047	146.47	136.38	1.07	ILMN_3276016	LOC339843
1088	0.00417	0.0468	0.0041	1191.77	1109.95	1.07	ILMN_1689446	EIF3G
1089	0.0041747	0.0468	0.0042	160.65	148.07	1.08	ILMN_1695468	SRPK2
1090	0.0041858	0.0469	0.0038	399.11	471.59	0.85	ILMN_2091846	FTHL2
1091	0.0041981	0.0469	0.0043	795.67	930.48	0.86	ILMN_2124757	RPL23AP13
1092	0.0041987	0.0469	0.0034	2428.77	2207.31	1.1	ILMN_1655497	EIF4B
1093	0.0042169	0.0471	0.0042	212.96	229.45	0.93	ILMN_3223317	LOC728666
1094	0.0042277	0.0472	0.004	107.21	119.4	0.9	ILMN_1693225	LOC646897
1095	0.0042376	0.0472	0.0043	4192.21	3749.44	1.12	ILMN_3290577	LOC391833
1096	0.0042417	0.0472	0.0042	308.36	287.13	1.07	ILMN_1659845	KIAA0355
1097	0.004243	0.0472	0.0027	85.3	94.21	0.91	ILMN_1767661	LOC648907
1098	0.0042436	0.0472	0.0043	223.73	200.37	1.12	ILMN_3235176	C2orf89
1099	0.0042692	0.0474	0.0041	402.08	346.68	1.16	ILMN_1776188	MAP1LC3A
1100	0.0042767	0.0474	0.0042	90.39	96.69	0.93	ILMN_1686454	TIFA
1101	0.0043041	0.0477	0.004	250.58	278.19	0.9	ILMN_1679127	CCAR1
1102	0.0043048	0.0477	0.0043	97.91	106.95	0.92	ILMN_3292244	LOC100132804
1103	0.0043167	0.0478	0.0043	1223.57	1044.5	1.17	ILMN_1715991	SDPR
1104	0.0043254	0.0478	0.0042	254.61	239.15	1.06	ILMN_3251451	MED31
1105	0.004347	0.048	0.004	710.55	971.41	0.73	ILMN_3308961	MIR1974
1106	0.0043637	0.0481	0.005	76.32	70.63	1.08	ILMN_1752510	FAM13A
1107	0.0043667	0.0481	0.0038	744.62	693.8	1.07	ILMN_1812403	BCAP31
1108	0.0043759	0.0482	0.0043	91.56	98.8	0.93	ILMN_3201523	LOC100132652
1109	0.0044037	0.0485	0.004	454.3	490.98	0.93	ILMN_3258321	LOC100130932
1110	0.0044123	0.0485	0.0047	118.86	143.66	0.83	ILMN_1801776	PSG9
1111	0.0044417	0.0488	0.0043	100.74	93.38	1.08	ILMN_1742976	ZFP30
1112	0.004458	0.0488	0.0033	76.37	84.09	0.91	ILMN_1793849	TANK
1113	0.0044594	0.0488	0.0043	212.3	238.07	0.89	ILMN_1787314	ALS2CR14
1114	0.0044598	0.0488	0.0045	6355.54	6901.65	0.92	ILMN_3264073	LOC100130070
1115	0.0044887	0.0491	0.0036	352.96	323.8	1.09	ILMN_1676523	CCDC91
1116	0.0044985	0.0492	0.0044	621.56	583.92	1.06	ILMN_1785795	METAP1
1117	0.0045042	0.0492	0.0046	58.24	66	0.88	ILMN_3308592	MIR98
1118	0.0045312	0.0495	0.0049	92.71	86.88	1.07	ILMN_1696270	PLAG1
1119	0.0045456	0.0496	0.0036	760.87	914.5	0.83	ILMN_3243714	LOC642073
1120	0.0045484	0.0496	0.0043	391.76	347.79	1.13	ILMN_1739794	CD3E
1121	0.0045524	0.0496	0.0044	175.41	161.34	1.09	ILMN_1679949	SLC25A23
1122	0.0046011	0.05	0.0033	140.34	159.33	0.88	ILMN_1660341	LRPAP1
1123	0.0046136	0.05	0.0046	52	47.44	1.1	ILMN_2079508	ZNF204
1124	0.0046146	0.05	0.0019	36.78	41.7	0.88	ILMN_2415634	TTN
1125	0.004619	0.05	0.0047	42.56	45.34	0.94	ILMN_1691340	CACYBP
1126	0.0046211	0.05	0.0043	2644.81	2433.76	1.09	ILMN_3247452	LOC100128731
1127	0.0046217	0.05	0.0043	7468.22	6859.11	1.09	ILMN_3304130	LOC729236
1128	0.0046296	0.0501	0.005	267.64	290.52	0.92	ILMN_2384591	HN1
1129	0.0046323	0.0501	0.0055	1114.63	1345.2	0.83	ILMN_2407235	LOC402057
1130	0.0046351	0.0501	0.0043	496.87	610.58	0.81	ILMN_1731224	PARP9
1131	0.0046405	0.0501	0.0037	92.8	102.24	0.91	ILMN_1742143	HIST1H2AD
1132	0.004648	0.0501	0.005	129.17	120.15	1.08	ILMN_1716265	PGM2L1
1133	0.0046511	0.0501	0.0051	426.74	498.46	0.86	ILMN_3202315	LOC643779
1134	0.0046545	0.0501	0.0049	83.14	77	1.08	ILMN_2128639	C10orf47
1135	0.0046901	0.0504	0.0037	427.85	397	1.08	ILMN_1814230	MTCP1
1136	0.0046946	0.0504	0.0031	44.52	47.4	0.94	ILMN_1685077	SNX7
1137	0.0047101	0.0504	0.004	71.73	76.94	0.93	ILMN_3289655	LOC643960
1138	0.0047189	0.0504	0.0034	6416	5967.04	1.08	ILMN_3240740	EIF3L
1139	0.0047196	0.0504	0.0046	261.2	299.52	0.87	ILMN_1743476	LOC653829
1140	0.0047197	0.0504	0.0051	85.23	94.18	0.9	ILMN_3218721	LOC100131349
1141	0.0047198	0.0504	0.0048	70.01	65.8	1.06	ILMN_1767015	BCORL1
1142	0.0047238	0.0504	0.0037	107.09	96.69	1.11	ILMN_1774602	FBLN2
1143	0.0047358	0.0504	0.0024	93.27	105.13	0.89	ILMN_1870111
1144	0.0047375	0.0504	0.0041	984.16	1071.38	0.92	ILMN_2196588	C18orf32
1145	0.0047383	0.0504	0.0048	281.58	315.52	0.89	ILMN_2121068	ADAM17
1146	0.0047384	0.0504	0.0053	76.31	69.85	1.09	ILMN_1734991	PPM1B
1147	0.0047391	0.0504	0.0051	1115.19	991.54	1.12	ILMN_2221564	LYAR
1148	0.0047397	0.0504	0.0046	122.3	130.37	0.94	ILMN_2297864	MTMR14
1149	0.0047546	0.0505	0.0048	2041.54	2308.66	0.88	ILMN_3280496	LOC100131526
1150	0.0047572	0.0505	0.0052	177.4	195.91	0.91	ILMN_3307757	C17orf87
1151	0.0047706	0.0506	0.0057	59.7	66.18	0.9	ILMN_1783843	MIIP
1152	0.0047835	0.0507	0.0042	176.2	162.43	1.08	ILMN_3238326	RNF144A
1153	0.0047944	0.0507	0.0039	337.13	315.98	1.07	ILMN_1900661
1154	0.0048001	0.0508	0.0053	261.15	241.48	1.08	ILMN_2214144	TWSG1
1155	0.0048049	0.0508	0.0054	76.92	72.14	1.07	ILMN_1771084	ACSM3
1156	0.0048232	0.0509	0.0043	56.82	53.25	1.07	ILMN_1784985	PRRT3
1157	0.0048375	0.051	0.0053	59.69	55.31	1.08	ILMN_1658071	ATP1B1
1158	0.0048383	0.051	0.0047	116.62	124.11	0.94	ILMN_1696028	ETNK1
1159	0.0048476	0.051	0.0047	560.8	643.55	0.87	ILMN_2161286	FAM40B
1160	0.0048548	0.0511	0.0044	1756.42	1979.86	0.89	ILMN_3226613	LOC729686
1161	0.0048922	0.0514	0.0049	799.94	744.31	1.07	ILMN_1810467	PPP2R1A
1162	0.004893	0.0514	0.0045	66.45	70.89	0.94	ILMN_1748976	FAM91A2
1163	0.004906	0.0515	0.0045	2546.33	2853.66	0.89	ILMN_1713636	S100A6
1164	0.0049134	0.0515	0.0043	153.52	171.77	0.89	ILMN_2082893	LOC440157
1165	0.00492	0.0515	0.004	60.53	55.4	1.09	ILMN_1736184	GSTM3
1166	0.0049272	0.0516	0.0058	124.43	113.71	1.09	ILMN_1878029
1167	0.00495	0.0518	0.005	227.65	244.05	0.93	ILMN_1813801	LOC643668
1168	0.0049549	0.0518	0.0052	122.8	114.38	1.07	ILMN_1751425	ERMP1
1169	0.0049611	0.0518	0.0045	123.53	115.55	1.07	ILMN_1654392	KHNYN
1170	0.0049871	0.052	0.0048	865.63	786.65	1.1	ILMN_1739847	EIF3D
1171	0.0049951	0.052	0.0018	30.72	32.99	0.93	ILMN_2201768	KRT40
1172	0.0049969	0.052	0.005	1605.89	1867.99	0.86	ILMN_1724295	LOC643007
1173	0.0050181	0.0522	0.0051	317.71	292.51	1.09	ILMN_1733421	PRKCQ
1174	0.0050351	0.0523	0.0048	210.94	226.57	0.93	ILMN_2294751	ASCC3
1175	0.0050354	0.0523	0.0052	71.75	76.57	0.94	ILMN_2096737	ZNF567
1176	0.0050489	0.0524	0.005	105.53	131.08	0.81	ILMN_1665282	LOC652113
1177	0.0050568	0.0524	0.0048	817.65	916.82	0.89	ILMN_2046315	GABARAPL2
1178	0.0050683	0.0525	0.0057	55.31	59.1	0.94	ILMN_1668847	WWP2
1179	0.0050824	0.0526	0.0046	110.79	126.99	0.87	ILMN_1787988	UBE2D1
1180	0.0050858	0.0526	0.0053	2666.85	2497.52	1.07	ILMN_2079004	MDH2
1181	0.0050946	0.0526	0.0055	260.31	286.84	0.91	ILMN_2178088	ZNF131
1182	0.0051123	0.0527	0.0047	958.41	857.85	1.12	ILMN_1687315	RXRA
1183	0.0051196	0.0527	0.0059	4802.4	4457.77	1.08	ILMN_2046730	S100A10
1184	0.005121	0.0527	0.0039	68.03	63.94	1.06	ILMN_1701911	C5orf20
1185	0.0051245	0.0527	0.0035	266.91	230.65	1.16	ILMN_1657619	DNAJB14
1186	0.005127	0.0527	0.0016	47.08	53.29	0.88	ILMN_3238486	LOC730924
1187	0.0051508	0.0529	0.0066	52.3	57.11	0.92	ILMN_3266411	LOC100130892
1188	0.005157	0.0529	0.0045	75.81	83.07	0.91	ILMN_3238491	LOC100129055
1189	0.0051589	0.0529	0.0054	125.38	134.34	0.93	ILMN_1790162	LOC441155
1190	0.0051628	0.0529	0.005	2589.6	2412.83	1.07	ILMN_1726597	FAM65B
1191	0.0051675	0.0529	0.0047	84.43	92.22	0.92	ILMN_3190833	CCRL2
1192	0.0051693	0.0529	0.0051	95.45	89.49	1.07	ILMN_2138622	DKFZp686I15217
1193	0.0051729	0.0529	0.0043	332.87	308.89	1.08	ILMN_1769433	IQGAP2
1194	0.0051775	0.0529	0.0055	233.28	217.67	1.07	ILMN_1762003	SEC62
1195	0.0052048	0.0531	0.0055	51.22	55.15	0.93	ILMN_3259829	LOC100128269
1196	0.0052223	0.0533	0.0054	136.9	126.73	1.08	ILMN_3246900	LOC92249
1197	0.0052655	0.0536	0.0064	327.7	281.74	1.16	ILMN_2336609	SYTL2
1198	0.0052688	0.0536	0.0043	817.22	892.73	0.92	ILMN_1748283	PIM2
1199	0.0052695	0.0536	0.0047	97.93	104.56	0.94	ILMN_3201614	LOC646034
1200	0.0052699	0.0536	0.006	44.39	41.72	1.06	ILMN_3248063	LOC100132920
1201	0.0052732	0.0536	0.0044	354.03	383.19	0.92	ILMN_2298365	PPP2R2B
1202	0.0053025	0.0538	0.0056	61.85	57.45	1.08	ILMN_1865736
1203	0.0053213	0.054	0.0057	122.02	112.41	1.09	ILMN_3240586	PLD6
1204	0.0053259	0.054	0.0059	68.42	64.01	1.07	ILMN_2322972	ZFYVE27
1205	0.0053395	0.0541	0.0043	122.71	113.11	1.08	ILMN_2407824	ATP1B1
1206	0.0053426	0.0541	0.0051	43.76	46.59	0.94	ILMN_1659960	IL4I1
1207	0.0053772	0.0544	0.0058	45.54	42.68	1.07	ILMN_1795499	MAML3
1208	0.005394	0.0545	0.0045	388.6	359.73	1.08	ILMN_1811592	ARHGAP21
1209	0.0054018	0.0545	0.0056	818.8	765.43	1.07	ILMN_2380698	DSTN
1210	0.0054124	0.0546	0.0047	74.44	80.97	0.92	ILMN_1654010	AGPAT3
1211	0.0054321	0.0547	0.0049	138.3	150.01	0.92	ILMN_2211263	RFK
1212	0.0054349	0.0547	0.0051	193.18	212.54	0.91	ILMN_1674706	MTHFD2
1213	0.005445	0.0548	0.0048	111.54	120.48	0.93	ILMN_1719403	MTX1
1214	0.0054637	0.0549	0.0069	496.14	456.59	1.09	ILMN_1772702	SFRS2B
1215	0.0054703	0.0549	0.006	129.99	139.24	0.93	ILMN_1731248	LOC648705
1216	0.0054779	0.055	0.0046	320.36	363.6	0.88	ILMN_2233050	PLA2G2D
1217	0.0054901	0.055	0.0056	266.27	249.14	1.07	ILMN_1778032	SURF6
1218	0.005502	0.0551	0.0053	531.22	497.97	1.07	ILMN_2401057	CANX
1219	0.0055125	0.0552	0.0057	1128.33	1246.88	0.9	ILMN_2145250	NACAP1
1220	0.0055674	0.0557	0.0049	486.65	451.02	1.08	ILMN_1786976	RAB22A
1221	0.0055879	0.0558	0.0061	182.9	220.14	0.83	ILMN_1801254	LOC648984
1222	0.0056089	0.056	0.0045	160.03	175.29	0.91	ILMN_2245180	BUB3
1223	0.0056164	0.056	0.005	201.43	232.16	0.87	ILMN_1721727	USP6
1224	0.0056183	0.056	0.0043	180.47	168.43	1.07	ILMN_1843949
1225	0.0056341	0.0561	0.0048	166.43	182.66	0.91	ILMN_2370208	CMTM3
1226	0.0056569	0.0563	0.0061	150.72	139.4	1.08	ILMN_1798360	CXCR7
1227	0.0056865	0.0565	0.0055	271.56	253.9	1.07	ILMN_2097858	KIAA1737
1228	0.005693	0.0565	0.0055	52.81	57.37	0.92	ILMN_2100287	CCDC147
1229	0.0056991	0.0565	0.0048	66.88	72.59	0.92	ILMN_3274271	LOC401537
1230	0.0057052	0.0565	0.0048	864.41	973.03	0.89	ILMN_3261345	LOC100130053
1231	0.005708	0.0565	0.0058	80.71	92.59	0.87	ILMN_2367671	LIMK2
1232	0.0057096	0.0565	0.0053	167.44	154.69	1.08	ILMN_1842582
1233	0.0057416	0.0568	0.0049	100.41	92.1	1.09	ILMN_1738796	PITPNC1
1234	0.0057417	0.0568	0.0053	164.3	152.36	1.08	ILMN_1720623	SYTL3
1235	0.0057516	0.0568	0.0046	822.79	927.68	0.89	ILMN_1815578	ZNF223
1236	0.0057565	0.0568	0.0054	104.9	96.69	1.08	ILMN_3230337	LOC100132707
1237	0.0057568	0.0568	0.0059	158.03	147.66	1.07	ILMN_1780698	ZFYVE19
1238	0.0057995	0.0571	0.0051	51.33	47.21	1.09	ILMN_1719975	HOXC4
1239	0.0058	0.0571	0.0055	248.65	230.36	1.08	ILMN_3238889	RPRD2
1240	0.0058027	0.0571	0.0061	95.51	105.16	0.91	ILMN_3274586	LOC401817
1241	0.0058191	0.0572	0.0054	419.96	391.24	1.07	ILMN_2390974	DNAJB2
1242	0.0058331	0.0573	0.0058	89.38	97.69	0.91	ILMN_1660730	SLC7A3
1243	0.0058374	0.0573	0.0062	96.95	88.37	1.1	ILMN_1756049	NT5DC3
1244	0.0058687	0.0575	0.0046	204.04	182.39	1.12	ILMN_1744665	EP300
1245	0.0058705	0.0575	0.005	216.93	242.41	0.89	ILMN_3275033	LOC646841
1246	0.0058846	0.0576	0.0053	346.05	393.12	0.88	ILMN_3219739	LOC727970
1247	0.0058849	0.0576	0.0065	517.31	569.23	0.91	ILMN_2116556	LSM5
1248	0.0058927	0.0576	0.0044	45.56	42.68	1.07	ILMN_1746515	DNTT
1249	0.0058947	0.0576	0.0073	162.35	152.24	1.07	ILMN_1695362	ZNF32
1250	0.0059296	0.0579	0.0054	98.11	91.37	1.07	ILMN_1741288	ZNF136
1251	0.005963	0.0582	0.0054	107.49	100.91	1.07	ILMN_1657860	C1orf151
1252	0.0059756	0.0582	0.0072	106.68	99.54	1.07	ILMN_1738712	GPR180
1253	0.0059764	0.0582	0.0054	747.42	699.25	1.07	ILMN_1678671	KLHL24
1254	0.0060052	0.0584	0.0058	67.12	62.71	1.07	ILMN_1721046	PTMS
1255	0.0060217	0.0585	0.0054	105.18	111.81	0.94	ILMN_2218648	RAG1AP1
1256	0.0060287	0.0585	0.0061	68.64	74.23	0.92	ILMN_1801914	SH3BP2
1257	0.0060339	0.0585	0.0043	82.66	88.35	0.94	ILMN_1774380	LOC650898
1258	0.0060441	0.0585	0.0072	50.57	47.27	1.07	ILMN_1718984	FCGBP
1259	0.0060449	0.0585	0.0059	111.3	123.47	0.9	ILMN_3243568	LOC100131835
1260	0.0060452	0.0585	0.0059	259.21	240.19	1.08	ILMN_1695092	WRB
1261	0.0060461	0.0585	0.0057	96.73	85.51	1.13	ILMN_1776121	MGC42367
1262	0.0060572	0.0586	0.0068	88.17	94.58	0.93	ILMN_2296037	PTPN2
1263	0.0060625	0.0586	0.0063	46.19	42.95	1.08	ILMN_1789733	CLIP3
1264	0.0060703	0.0586	0.0056	688.61	813.64	0.85	ILMN_3249244	TMEM106A
1265	0.0060774	0.0586	0.0048	105.95	97.36	1.09	ILMN_1673357	SLA2
1266	0.0061116	0.0589	0.0051	289.52	267.21	1.08	ILMN_1737644	TMEM219
1267	0.0061119	0.0589	0.0048	61.15	55.79	1.1	ILMN_1702604	KCNA3
1268	0.0061209	0.0589	0.0068	308.38	280.56	1.1	ILMN_1677785	ZNF559
1269	0.0061343	0.059	0.0054	276.99	260.33	1.06	ILMN_1908989
1270	0.006147	0.0591	0.0076	149.71	133.25	1.12	ILMN_1657996	LOC642035
1271	0.0061575	0.0591	0.0077	3101.55	2812.17	1.1	ILMN_1656920	CRIP1
1272	0.0061611	0.0591	0.0064	88.52	82.31	1.08	ILMN_1740927	LYRM4
1273	0.0061707	0.0591	0.0064	216.28	201.15	1.08	ILMN_1655694	LOC642031
1274	0.0061801	0.0592	0.0052	274.83	256.64	1.07	ILMN_2127328	PURA
1275	0.0061893	0.0592	0.0068	1031.84	1114.54	0.93	ILMN_1783852	CD164
1276	0.0061893	0.0592	0.0059	1764.19	1593.4	1.11	ILMN_1712944	AES
1277	0.0061925	0.0592	0.0061	241.47	224.6	1.08	ILMN_1710571	PAPD5
1278	0.0061964	0.0592	0.007	136.33	148	0.92	ILMN_1707804	SULT1A3
1279	0.0062043	0.0592	0.0057	114.24	100.91	1.13	ILMN_3261747	LOC100128729
1280	0.0062052	0.0592	0.006	430.91	399.24	1.08	ILMN_1799069	LOC440280
1281	0.0062103	0.0592	0.0071	67.64	71.83	0.94	ILMN_3252093	LOC100128548
1282	0.00624	0.0594	0.0051	3029.81	2694.86	1.12	ILMN_2325837	CD3D
1283	0.0062666	0.0596	0.0055	108.22	118.49	0.91	ILMN_2380754	CCNG1
1284	0.0062689	0.0596	0.0059	361.72	333.2	1.09	ILMN_2374249	DYRK2
1285	0.0062778	0.0596	0.0067	596.31	547.05	1.09	ILMN_1811972	MYCBP2
1286	0.0062814	0.0596	0.0062	197.24	212.94	0.93	ILMN_1807833	HM13
1287	0.0062959	0.0597	0.0067	60.16	55.4	1.09	ILMN_1701643	GDPD5
1288	0.0063041	0.0597	0.007	176.03	160.11	1.1	ILMN_1671742	UPF3A
1289	0.0063049	0.0597	0.0064	438.28	402.77	1.09	ILMN_1660368	TRRAP
1290	0.0063122	0.0597	0.0064	273.26	256.77	1.06	ILMN_1699598	AP2M1
1291	0.0063228	0.0598	0.0064	111.36	103.88	1.07	ILMN_2103591	MORC2
1292	0.006342	0.0599	0.0054	80.42	74.48	1.08	ILMN_3288755	LOC646808
1293	0.0063442	0.0599	0.0058	99.22	90.97	1.09	ILMN_1812070	ABCB1
1294	0.0063525	0.0599	0.0063	126.76	117.95	1.07	ILMN_2214098	BIVM
1295	0.006364	0.06	0.0052	116.17	131.84	0.88	ILMN_1695000	TFIP11
1296	0.0063752	0.06	0.0027	40.35	43.38	0.93	ILMN_1797038	LOC647654
1297	0.0063854	0.06	0.0067	803.27	720.21	1.12	ILMN_1746565	CD6
1298	0.0063857	0.06	0.0067	598.68	561.12	1.07	ILMN_1755909	C20orf11
1299	0.006386	0.06	0.0066	3243.79	3048.67	1.06	ILMN_1751258	NDUFA4
1300	0.0063975	0.06	0.0057	2545.48	2343.78	1.09	ILMN_1658464	GTF3A
1301	0.0063989	0.06	0.0057	2303.44	2064.14	1.12	ILMN_1719224	C17orf45
1302	0.0064348	0.0603	0.0054	214.24	227.76	0.94	ILMN_2402674	DPM3
1303	0.0064502	0.0604	0.0058	5318.41	4862.66	1.09	ILMN_1788742	LOC441246
1304	0.0064521	0.0604	0.006	69.48	64.36	1.08	ILMN_1791847	DAPK2
1305	0.0064862	0.0606	0.0052	205.69	226.07	0.91	ILMN_2118910	TPRKB
1306	0.006496	0.0607	0.0076	44.44	47.38	0.94	ILMN_1719826	LOC441956
1307	0.0064986	0.0607	0.0056	6568.45	6109.22	1.08	ILMN_2087080	RPL5
1308	0.0065355	0.061	0.0057	263.97	285.91	0.92	ILMN_1726342	BIN2
1309	0.006547	0.061	0.0058	64.77	58.57	1.11	ILMN_3184334	LOC100130769
1310	0.0065476	0.061	0.0058	117.31	128.82	0.91	ILMN_3239653	RAX2
1311	0.0065716	0.0611	0.0062	389.58	419.95	0.93	ILMN_1745110	LAPTM4A
1312	0.0065748	0.0611	0.0069	373.21	342.94	1.09	ILMN_1672547	MYO9B
1313	0.0065751	0.0611	0.0064	1594.97	1795.2	0.89	ILMN_1751079	TAP1
1314	0.0065778	0.0611	0.0067	282.04	265.4	1.06	ILMN_3237966	FBXL11
1315	0.0065853	0.0611	0.007	2881.52	3233.94	0.89	ILMN_3289171	LOC100131572
1316	0.0066029	0.0612	0.0063	151.43	137.49	1.1	ILMN_1652650	SH3KBP1
1317	0.006614	0.0613	0.0068	571.32	521.25	1.1	ILMN_1658460	LOC653884
1318	0.0066171	0.0613	0.0062	706.39	587.65	1.2	ILMN_1653652	PTPRC
1319	0.0066223	0.0613	0.0065	577.97	534.84	1.08	ILMN_2376625	VHL
1320	0.006645	0.0614	0.0058	169.19	181.4	0.93	ILMN_2204983	DCTN6
1321	0.0066647	0.0616	0.0077	294.65	364.44	0.81	ILMN_2399463	VAV3
1322	0.006682	0.0617	0.0058	3456.9	3202.93	1.08	ILMN_2388605	ACTR2
1323	0.0066872	0.0617	0.0054	423.86	491.38	0.86	ILMN_2093389	SNAPC1
1324	0.0067122	0.0618	0.0057	170.02	214.95	0.79	ILMN_1745242	PLSCR1
1325	0.0067147	0.0618	0.0072	133.9	118.53	1.13	ILMN_1808590	GUCY1A3
1326	0.0067318	0.0619	0.0064	141.81	151.73	0.93	ILMN_1689119	ZC3H5
1327	0.0067426	0.062	0.0068	2368.89	2905.44	0.82	ILMN_1666078	HLA-H
1328	0.0067561	0.0621	0.0069	166.25	154.21	1.08	ILMN_1726421	METTL9
1329	0.0067603	0.0621	0.0064	311.18	274.48	1.13	ILMN_1717197	CD3G
1330	0.0067726	0.0621	0.0064	276.16	252.24	1.09	ILMN_1756204	RPS6KA4
1331	0.0067857	0.0622	0.0073	122.48	112.43	1.09	ILMN_3243452	SNORD95
1332	0.0067906	0.0622	0.0062	234.28	218.16	1.07	ILMN_1797372	C3orf58
1333	0.006794	0.0622	0.0068	140.7	130.22	1.08	ILMN_1715555	DBP
1334	0.0068938	0.0631	0.007	180.77	169.37	1.07	ILMN_1802628	PPAPDC2
1335	0.0068983	0.0631	0.0076	210.75	241.67	0.87	ILMN_1690638	LOC402677
1336	0.0069128	0.0631	0.006	203.02	190.97	1.06	ILMN_1729976	ZNF828
1337	0.0069166	0.0631	0.0078	126.16	135.68	0.93	ILMN_1735004	C4orf43
1338	0.0069188	0.0631	0.0063	56.21	51.95	1.08	ILMN_1734184	P76
1339	0.0069353	0.0632	0.0068	112	120.46	0.93	ILMN_1666853	LOC644482
1340	0.0069454	0.0632	0.0073	69.58	64.09	1.09	ILMN_1742808	SF1
1341	0.00695	0.0632	0.0088	137.46	121.01	1.14	ILMN_1744912	CTTN
1342	0.0069513	0.0632	0.0072	225.87	209.62	1.08	ILMN_1765829	NUFIP2
1343	0.0069596	0.0632	0.0064	68.64	73.4	0.94	ILMN_3247783	MGC21881
1344	0.0069606	0.0632	0.0068	55.43	51.9	1.07	ILMN_2319766	RUFY2
1345	0.0069663	0.0632	0.0073	451.23	482.9	0.93	ILMN_2358980	ILK
1346	0.0069788	0.0633	0.0074	460.81	432.98	1.06	ILMN_1692199	RNF103
1347	0.006998	0.0634	0.0066	4931.05	4534.71	1.09	ILMN_1685088	RPL36
1348	0.0069988	0.0634	0.0057	1011.44	884.71	1.14	ILMN_1691693	FCRL3
1349	0.0070124	0.0634	0.007	725.75	814.2	0.89	ILMN_1739541	NMI
1350	0.007042	0.0636	0.006	359.93	338.73	1.06	ILMN_1731064	CABC1
1351	0.0070423	0.0636	0.0068	82.77	95.98	0.86	ILMN_1659688	LGALS3BP
1352	0.00706	0.0637	0.0072	58.33	53.84	1.08	ILMN_2173294	FLJ10916
1353	0.0070681	0.0637	0.0068	61.15	57.26	1.07	ILMN_1742548	GFI1B
1354	0.0070736	0.0637	0.0062	6412.58	5950.04	1.08	ILMN_2219134	RPS15
1355	0.0070864	0.0638	0.0062	210.19	228.08	0.92	ILMN_3245773	PION
1356	0.0070908	0.0638	0.0057	155.74	167.15	0.93	ILMN_2330948	ARF1
1357	0.0070936	0.0638	0.006	5901.12	5484.75	1.08	ILMN_1703565	GLTSCR2
1358	0.0071008	0.0638	0.0066	57.79	54.13	1.07	ILMN_1670037	POLR2L
1359	0.0071034	0.0638	0.0063	207.55	185.35	1.12	ILMN_1742544	MEF2C
1360	0.0071162	0.0638	0.0067	272.37	293.02	0.93	ILMN_1691444	UHRF2
1361	0.00712	0.0638	0.0081	77.46	68.85	1.13	ILMN_1751625	MS4A3
1362	0.007127	0.0638	0.0065	70.06	65.23	1.07	ILMN_1763364	WHAMM
1363	0.00718	0.0643	0.0082	47.32	44.32	1.07	ILMN_1670398	BCR
1364	0.0072008	0.0643	0.0073	85.09	90.78	0.94	ILMN_1668726	NFYB
1365	0.0072015	0.0643	0.0069	76.71	70.46	1.09	ILMN_2305407	ZBTB16
1366	0.0072079	0.0643	0.0062	71.76	67.32	1.07	ILMN_1713162	GSTM2
1367	0.0072147	0.0643	0.0063	70.77	66.48	1.06	ILMN_2410929	PAPSS2
1368	0.007216	0.0643	0.0063	1185.65	1109.88	1.07	ILMN_3237665	COX7A2L
1369	0.0072185	0.0643	0.006	368.64	398.39	0.93	ILMN_1697735	EWSR1
1370	0.0072188	0.0643	0.0067	56.97	52.2	1.09	ILMN_1686373	C15orf26
1371	0.0072263	0.0643	0.0074	5232.09	4755.09	1.1	ILMN_3211906	LOC647030
1372	0.00723	0.0643	0.0088	52.54	55.86	0.94	ILMN_2162135	FLJ13611
1373	0.0072393	0.0643	0.0059	319.03	356.78	0.89	ILMN_2133784	PATE2
1374	0.0072402	0.0643	0.0076	400.57	428.65	0.93	ILMN_3283680	LOC345041
1375	0.0072526	0.0644	0.0084	70.81	75.91	0.93	ILMN_2278850	RAB24
1376	0.0073134	0.0648	0.0063	122.35	133.18	0.92	ILMN_1916457
1377	0.0073152	0.0648	0.0081	1123.05	1263.84	0.89	ILMN_1803788	LGALS3
1378	0.0073416	0.065	0.0052	402.32	442.71	0.91	ILMN_2343332	TAF9
1379	0.0073417	0.065	0.0089	48.66	45.36	1.07	ILMN_1813950	LOC653486
1380	0.0073534	0.065	0.0081	5916.54	5376.93	1.1	ILMN_1764721	RPL8
1381	0.0074154	0.0655	0.0065	110.82	120.59	0.92	ILMN_1750178	LOC653450
1382	0.0074163	0.0655	0.0074	77.42	72.34	1.07	ILMN_1763634	PEX14
1383	0.0074203	0.0655	0.0067	148.16	136.28	1.09	ILMN_1728684	PELP1
1384	0.0074458	0.0656	0.0062	55.72	52.18	1.07	ILMN_1814917	TLE2
1385	0.0074519	0.0656	0.008	349.2	322.41	1.08	ILMN_1738816	FOXO1
1386	0.007453	0.0656	0.0076	796.84	749.27	1.06	ILMN_1810334	COMMD7
1387	0.0074538	0.0656	0.0101	209.23	227.74	0.92	ILMN_2399627	AP1G1
1388	0.0074792	0.0658	0.0066	428.26	496.1	0.86	ILMN_2228196	C6orf170
1389	0.0074992	0.0659	0.007	688.48	648.43	1.06	ILMN_2332105	WRNIP1
1390	0.0075025	0.0659	0.0059	390.25	349.31	1.12	ILMN_2340052	NCOR2
1391	0.0075134	0.0659	0.0049	56.93	53.43	1.07	ILMN_2384405	RTBDN
1392	0.0075163	0.0659	0.0064	145.58	135.64	1.07	ILMN_2163819	KIF21B
1393	0.0075297	0.066	0.0075	75.6	71.2	1.06	ILMN_3180294	LOC100128994
1394	0.0075552	0.0661	0.0069	899.88	813.18	1.11	ILMN_1689160	DPEP2
1395	0.0075703	0.0662	0.006	43.89	41.3	1.06	ILMN_1740604	RAB11FIP5
1396	0.0076001	0.0664	0.0078	118.6	128.43	0.92	ILMN_2121555	FBXO5
1397	0.0076188	0.0665	0.0072	173.25	162	1.07	ILMN_1695316	SLC39A8
1398	0.0076299	0.0666	0.0073	56.89	53.23	1.07	ILMN_3238358	SCARNA22
1399	0.0076458	0.0667	0.0061	146.92	134.43	1.09	ILMN_1661337	SRM
1400	0.0076666	0.0668	0.0072	722.47	816.5	0.88	ILMN_2383107	VPS41
1401	0.0076762	0.0669	0.0058	49.02	52.14	0.94	ILMN_1769849	HORMAD1
1402	0.0076998	0.067	0.0065	343.74	320.54	1.07	ILMN_2110532	RPL26L1
1403	0.0077097	0.0671	0.0068	44.49	47.31	0.94	ILMN_2215025	HORMAD1
1404	0.0077222	0.0671	0.0088	180.41	191.98	0.94	ILMN_1671728	CARD14
1405	0.0077256	0.0671	0.0075	81.02	75.56	1.07	ILMN_1681846	ZNF540
1406	0.0077281	0.0671	0.0072	102.69	122.36	0.84	ILMN_2312606	IRF5
1407	0.0077706	0.0674	0.0069	70.16	65.03	1.08	ILMN_2141790	HYOU1
1408	0.0077787	0.0674	0.008	146.38	136.24	1.07	ILMN_1691466	YES1
1409	0.0077815	0.0674	0.0083	358.9	304.93	1.18	ILMN_3279144	LOC100131672
1410	0.0077856	0.0674	0.0073	4036.88	3768.12	1.07	ILMN_1699931	HCST
1411	0.007791	0.0674	0.0074	385.64	418.55	0.92	ILMN_3234513	LOC728416
1412	0.0078022	0.0674	0.0073	608.01	507.23	1.2	ILMN_2340217	PTPRC
1413	0.0078087	0.0674	0.008	83.28	90.79	0.92	ILMN_1798528	SULT1A2
1414	0.0078149	0.0674	0.0074	37.91	40.19	0.94	ILMN_2193443	TRIM16L
1415	0.007833	0.0675	0.008	102.29	93.71	1.09	ILMN_2379560	CDC14B
1416	0.0078352	0.0675	0.0076	368.25	347.4	1.06	ILMN_1665538	SKP2
1417	0.0078459	0.0676	0.0059	105.43	98.93	1.07	ILMN_1759595	C22orf29
1418	0.0078609	0.0676	0.007	199.68	180.99	1.1	ILMN_1698419	NCOR2
1419	0.007872	0.0677	0.0084	43.29	40.5	1.07	ILMN_2172318	FAM19A2
1420	0.0078797	0.0677	0.0054	169.65	146	1.16	ILMN_3250243	FAM119A
1421	0.0078851	0.0677	0.0084	318.46	363.33	0.88	ILMN_3267476	LOC100129243
1422	0.0078927	0.0677	0.009	49.47	52.58	0.94	ILMN_1746213	SNX20
1423	0.0078963	0.0677	0.0072	361.62	401.31	0.9	ILMN_1781251	LOC653115
1424	0.0079152	0.0678	0.0077	97.89	112.31	0.87	ILMN_1684312	NHLRC4
1425	0.0079208	0.0678	0.0083	236.26	214.4	1.1	ILMN_1794782	ABCG1
1426	0.0079268	0.0678	0.0087	89.05	100.98	0.88	ILMN_1745214	LOC642393
1427	0.0079323	0.0678	0.0074	104.41	111.26	0.94	ILMN_1811181	FLJ20444
1428	0.0079522	0.0679	0.0079	3759.4	3471.7	1.08	ILMN_1738383	EEF2
1429	0.0079591	0.0679	0.0079	494.67	539.39	0.92	ILMN_1689142	UBE1C
1430	0.0079624	0.0679	0.0069	406.03	379.09	1.07	ILMN_1748926	TMEM209
1431	0.0079723	0.068	0.0072	316.65	294.2	1.08	ILMN_1674551	SMAD5
1432	0.0079756	0.068	0.0071	278.86	322.22	0.87	ILMN_3253787	LOC100128274
1433	0.0079826	0.068	0.0074	1846.37	1647.75	1.12	ILMN_1802053	ZNF91
1434	0.0079989	0.0681	0.0069	380.46	414.22	0.92	ILMN_2063114	TAF1D
1435	0.0080347	0.0683	0.0074	219.2	206.49	1.06	ILMN_1734138	TATDN2
1436	0.0080428	0.0683	0.0074	75.12	83.41	0.9	ILMN_1747589	HIST2H2AB
1437	0.0080677	0.0685	0.0079	68.07	72.79	0.94	ILMN_2207816	DTWD1
1438	0.008113	0.0688	0.0077	953.69	885.73	1.08	ILMN_1754234	ZMYND11
1439	0.0081168	0.0688	0.009	69.72	74.4	0.94	ILMN_2325338	APOL2
1440	0.0081218	0.0688	0.0089	392.02	360.82	1.09	ILMN_2298818	RPS29
1441	0.0081306	0.0688	0.0083	68.91	73.74	0.93	ILMN_3309544	MIR877
1442	0.0081391	0.0688	0.0076	276.89	260.05	1.06	ILMN_3251085	RBBP4
1443	0.0081418	0.0688	0.0072	443.78	403.73	1.1	ILMN_1696643	TLN1
1444	0.0081454	0.0688	0.0076	5972.22	5527.5	1.08	ILMN_1689712	LOC440927
1445	0.008165	0.0689	0.0086	74.62	79.13	0.94	ILMN_1757132	SMC5
1446	0.0081663	0.0689	0.0106	180.29	167.89	1.07	ILMN_1814247	TCFL5
1447	0.0081982	0.0691	0.0078	130.29	148.8	0.88	ILMN_1670932	LOC645737
1448	0.0082126	0.0692	0.0084	54.03	57.25	0.94	ILMN_1698650	C17orf41
1449	0.0082253	0.0693	0.0084	51.4	54.81	0.94	ILMN_3300891	LOC729652
1450	0.008231	0.0693	0.0091	92.07	104.54	0.88	ILMN_3239766	FKBP1P1
1451	0.0082392	0.0693	0.0084	70.61	65.75	1.07	ILMN_2388272	MED24
1452	0.0082417	0.0693	0.0077	164.89	155.48	1.06	ILMN_1676745	ZNF142
1453	0.0082708	0.0695	0.0068	157.2	171.96	0.91	ILMN_3287058	LOC100132086
1454	0.008282	0.0695	0.0096	129.75	141.23	0.92	ILMN_3181452	LOC100128627
1455	0.0083302	0.0699	0.0077	176.3	194.62	0.91	ILMN_3242551	LOC100130707
1456	0.0083474	0.07	0.009	51.3	55.21	0.93	ILMN_1705861	AP1M2
1457	0.0083643	0.07	0.0075	243.7	267.6	0.91	ILMN_1761922	LOC647037
1458	0.0083724	0.0701	0.009	218.69	202.52	1.08	ILMN_2110167	POLR1E
1459	0.0083822	0.0701	0.0077	108.81	116.98	0.93	ILMN_2401770	PHF14
1460	0.0083883	0.0701	0.0066	564.56	647.71	0.87	ILMN_3212284	LOC645693
1461	0.0084192	0.0703	0.009	438.06	413.02	1.06	ILMN_1678140	TTC4
1462	0.008425	0.0703	0.0077	349.04	326.75	1.07	ILMN_2045994	SEPW1
1463	0.0084649	0.0705	0.0076	167.16	178.59	0.94	ILMN_1783170	ING3
1464	0.0084739	0.0705	0.0085	7058.59	6572.22	1.07	ILMN_1760714	RPS3
1465	0.0084797	0.0705	0.0067	135.59	146.92	0.92	ILMN_1681160	CCT6P1
1466	0.0084821	0.0705	0.0087	759.45	705.79	1.08	ILMN_1741613	SERINC1
1467	0.0084864	0.0705	0.0094	56.95	64.16	0.89	ILMN_3249400	LOC100133034
1468	0.008487	0.0705	0.0092	245.93	229.04	1.07	ILMN_1680579	ATP2B4
1469	0.0084876	0.0705	0.0089	214.93	197.35	1.09	ILMN_1796177	GIPC1
1470	0.0084973	0.0705	0.0066	60.04	63.78	0.94	ILMN_2073520	C2orf21
1471	0.0085019	0.0705	0.0082	119.63	129.53	0.92	ILMN_1672650	PKM2
1472	0.0085331	0.0707	0.0079	214.24	233.82	0.92	ILMN_1684114	LOC286016
1473	0.0085362	0.0707	0.0086	2816.67	2655.87	1.06	ILMN_2117223	ROD1
1474	0.0085469	0.0708	0.0087	102.96	95	1.08	ILMN_1767514	LOC441155
1475	0.0085531	0.0708	0.009	55.63	59.28	0.94	ILMN_1769207	KCTD7
1476	0.0085944	0.071	0.0069	556.09	628.33	0.89	ILMN_3201365	LOC442232
1477	0.0086023	0.0711	0.007	552.05	604.21	0.91	ILMN_1703335	LACTB
1478	0.0086159	0.0711	0.0075	86.42	92.87	0.93	ILMN_3247148	SNORD76
1479	0.0086375	0.0713	0.0102	273.54	250.41	1.09	ILMN_1782331	TDG
1480	0.0086608	0.0714	0.0099	160.83	142.65	1.13	ILMN_1900270
1481	0.0086659	0.0714	0.0104	51.73	48.73	1.06	ILMN_1723626	APBA2
1482	0.008687	0.0715	0.0081	320.63	353.67	0.91	ILMN_2090607	IRF2
1483	0.0086998	0.0715	0.0095	73.74	69.42	1.06	ILMN_1795918	CENTG3
1484	0.0087058	0.0715	0.0079	601.88	642.18	0.94	ILMN_2167011	ECHDC1
1485	0.0087109	0.0715	0.0077	1150.51	1465.17	0.79	ILMN_1797895	FFAR2
1486	0.0087168	0.0715	0.0085	164.18	153.92	1.07	ILMN_1714159	LUZP1
1487	0.0087203	0.0715	0.0075	1615.27	1489.7	1.08	ILMN_1758672	FAM107B
1488	0.0087252	0.0715	0.008	273.44	304.77	0.9	ILMN_1737586	LOC653994
1489	0.0087319	0.0716	0.0087	160.74	149.73	1.07	ILMN_1655244	LOC642755
1490	0.008749	0.0716	0.009	290.49	273.89	1.06	ILMN_1691432	PRDM4
1491	0.0087919	0.072	0.0116	132.79	141.7	0.94	ILMN_1803744	SELS
1492	0.0088012	0.072	0.0085	400.11	369.56	1.08	ILMN_1793287	LOC642755
1493	0.0088076	0.072	0.0088	91.99	99.32	0.93	ILMN_2094261	AMY1B
1494	0.0088111	0.072	0.0072	193.94	216.24	0.9	ILMN_1731203	RNF213
1495	0.0088613	0.0723	0.0087	155.2	166.95	0.93	ILMN_2103480	ZNF320
1496	0.0088768	0.0724	0.0092	85.37	79.4	1.08	ILMN_1727300	ZNF444
1497	0.0088785	0.0724	0.0082	691.77	653.18	1.06	ILMN_1776375	PIN1
1498	0.008901	0.0725	0.0076	665.55	761.66	0.87	ILMN_2089175	SYAP1
1499	0.0089247	0.0726	0.0081	395.2	438.2	0.9	ILMN_1719905	TLR10
1500	0.0089532	0.0728	0.0083	144.85	157.6	0.92	ILMN_2376142	UBE2W
1501	0.0089737	0.0729	0.0115	55.48	52.37	1.06	ILMN_1690583	LOC728608
1502	0.0089759	0.0729	0.0081	109.32	120.41	0.91	ILMN_1766184	LOC654346
1503	0.0090145	0.0731	0.0101	151.39	165.15	0.92	ILMN_1751753	IDH2
1504	0.0090151	0.0731	0.0076	144.38	135.48	1.07	ILMN_1658290	C16orf68
1505	0.009054	0.0734	0.0078	596.8	691.11	0.86	ILMN_2207505	LEP
1506	0.0090713	0.0735	0.0088	179.76	193.96	0.93	ILMN_1715705	SSNA1
1507	0.0090832	0.0735	0.0087	1161.91	1056.49	1.1	ILMN_1780898	PRKCH
1508	0.009112	0.0737	0.0094	84.25	91.17	0.92	ILMN_2102515	PGAM4
1509	0.0091183	0.0737	0.009	162.49	153.33	1.06	ILMN_1745813	KIAA1279
1510	0.0091356	0.0738	0.009	970.31	1125.27	0.86	ILMN_3235357	LOC100133329
1511	0.0091452	0.0739	0.0083	61.29	68.02	0.9	ILMN_3200211	LOC643680
1512	0.009164	0.074	0.0083	56.52	52.64	1.07	ILMN_1810385	ATR
1513	0.0091769	0.074	0.0102	317.07	298.58	1.06	ILMN_2400947	CUGBP2
1514	0.0091896	0.0741	0.0096	2115.78	2370.8	0.89	ILMN_3282395	LOC646966
1515	0.0092229	0.0742	0.0094	187.05	173.15	1.08	ILMN_1697286	SF3A1
1516	0.0092297	0.0742	0.0072	47.12	50.36	0.94	ILMN_1695485	C9orf109
1517	0.0092307	0.0742	0.0089	1162.77	1517.93	0.77	ILMN_3288268	LOC100132499
1518	0.0092912	0.0747	0.0103	304.4	352.68	0.86	ILMN_2101928	HNRPH1
1519	0.0093264	0.0749	0.0089	358.43	335.47	1.07	ILMN_1704305	NIP7
1520	0.0093387	0.0749	0.0084	149.61	162.26	0.92	ILMN_3239361	LOC100133298
1521	0.0093394	0.0749	0.0095	482.44	378.81	1.27	ILMN_2201580	GSTM2
1522	0.0093603	0.075	0.01	196.82	180.71	1.09	ILMN_1812559	SLC7A6
1523	0.0093697	0.0751	0.0073	567.07	524.03	1.08	ILMN_1742400	CEP350
1524	0.009383	0.0751	0.0098	79.26	72.79	1.09	ILMN_1656560	PARM1
1525	0.009402	0.0752	0.0093	322.78	302.77	1.07	ILMN_1810229	ARID4A
1526	0.0094456	0.0755	0.0089	62.31	58.62	1.06	ILMN_1709112	CHM
1527	0.0094687	0.0757	0.0085	283.97	259.61	1.09	ILMN_1714444	KLF12
1528	0.0094771	0.0757	0.0101	126.56	140.75	0.9	ILMN_1651499	ERGIC1
1529	0.0094857	0.0757	0.0106	50.13	53.27	0.94	ILMN_1670147	PHC2
1530	0.0095241	0.076	0.0092	8502.1	7815.27	1.09	ILMN_3243700	RPS8
1531	0.0095392	0.076	0.0081	540.42	602.12	0.9	ILMN_3260180	FLJ25363
1532	0.0095876	0.0763	0.0084	1262.46	1176.6	1.07	ILMN_2104877	CMPK1
1533	0.009592	0.0763	0.0092	324.29	355.03	0.91	ILMN_1681798	41158
1534	0.0096009	0.0764	0.0093	147.1	171.42	0.86	ILMN_2190779	PHAX
1535	0.0096084	0.0764	0.0095	803.44	751.61	1.07	ILMN_1783424	PUM1
1536	0.0096446	0.0765	0.0078	2511.65	2247.33	1.12	ILMN_2261416	CD3D
1537	0.0096505	0.0765	0.0099	540.93	577.02	0.94	ILMN_2112417	PGAM1
1538	0.0096535	0.0765	0.0116	72.61	67.72	1.07	ILMN_1715603	IL23A
1539	0.0096536	0.0765	0.0097	151.93	161.8	0.94	ILMN_3213640	LOC100132444
1540	0.0096549	0.0765	0.0103	399.12	365.24	1.09	ILMN_3240222	PRAGMIN
1541	0.009665	0.0765	0.0096	115.82	107.72	1.08	ILMN_1696190	STRN4
1542	0.0096661	0.0765	0.011	58.36	61.85	0.94	ILMN_1792150	ALOX5
1543	0.0097118	0.0768	0.0098	43.14	45.66	0.94	ILMN_2165985	RPAP3
1544	0.0097124	0.0768	0.0083	395.22	450.27	0.88	ILMN_2047885	PCDHB9
1545	0.0097276	0.0768	0.0105	58.44	62.17	0.94	ILMN_3262840	LOC100128516
1546	0.0097394	0.0769	0.0088	181.51	171.28	1.06	ILMN_1721605	SMYD2
1547	0.0097544	0.0769	0.009	245.51	229.48	1.07	ILMN_1755643	MGAT4A
1548	0.0097668	0.0769	0.0094	747.44	658.5	1.14	ILMN_1688959	CD27
1549	0.0097703	0.0769	0.0087	1375.53	1165.57	1.18	ILMN_1699071	C21orf7
1550	0.0097792	0.0769	0.0101	80.16	85.47	0.94	ILMN_2090351	OR7E156P
1551	0.0097817	0.0769	0.0085	766.26	914.24	0.84	ILMN_3269537	LOC100130562
1552	0.0097864	0.0769	0.0106	251.09	280.81	0.89	ILMN_1663422	RGL4
1553	0.0097932	0.0769	0.0098	193.06	217.01	0.89	ILMN_1799765	RAB24
1554	0.0098301	0.0771	0.01	455.84	502.65	0.91	ILMN_1683969	FKBP1A
1555	0.0098456	0.0771	0.0109	1097.13	1163.36	0.94	ILMN_1695588	HNRPC
1556	0.0098491	0.0771	0.01	3075.56	2809.44	1.09	ILMN_3294335	LOC646294
1557	0.0098501	0.0771	0.0101	360.6	333.69	1.08	ILMN_1738369	TUFM
1558	0.0098549	0.0771	0.0102	75.86	71	1.07	ILMN_1676088	MSRB3
1559	0.0098604	0.0771	0.0101	816.6	885.32	0.92	ILMN_1704094	PSMA6
1560	0.0098628	0.0771	0.0106	391.8	422.07	0.93	ILMN_3225244	TSEN15
1561	0.0099265	0.0776	0.0119	56.85	52.38	1.09	ILMN_2413816	GRB14
1562	0.0099384	0.0776	0.0086	159.73	150.25	1.06	ILMN_1763884	Magmas
1563	0.0099914	0.078	0.0109	1218.24	1131.6	1.08	ILMN_1738075	CMIP
1564	0.0100076	0.0781	0.0097	551.36	514.37	1.07	ILMN_1749591	ITGAL
1565	0.010012	0.0781	0.0096	7950.89	8511.96	0.93	ILMN_2401906	CDAN1
1566	0.0100308	0.0782	0.0088	91.18	107.05	0.85	ILMN_3238814	LOC100170939
1567	0.0100627	0.0784	0.0098	150.63	165.77	0.91	ILMN_1651752	CXorf21
1568	0.0100968	0.0785	0.0107	331.88	368.04	0.9	ILMN_2203807	MRP63
1569	0.0101003	0.0785	0.0098	68.28	63.25	1.08	ILMN_1652525	FAM125B
1570	0.0101007	0.0785	0.008	35.25	37.3	0.94	ILMN_2121568	GBP6
1571	0.0101292	0.0787	0.0076	106.91	98.32	1.09	ILMN_2207328	C18orf10
1572	0.0101424	0.0787	0.0099	404.27	376.91	1.07	ILMN_2158336	SH3GLB2
1573	0.0101579	0.0788	0.0083	69.24	76.07	0.91	ILMN_2162564	DYNLT3
1574	0.0101931	0.079	0.009	126.02	109.56	1.15	ILMN_1691264	NAT8B
1575	0.0101991	0.079	0.0103	312.1	295.02	1.06	ILMN_2138435	MRPS27
1576	0.0102269	0.0792	0.0104	117.37	128.92	0.91	ILMN_1773616	LOC645052
1577	0.0102498	0.0793	0.0084	910.19	1004.75	0.91	ILMN_3287996	LOC400446
1578	0.0102724	0.0794	0.0099	453.82	542.74	0.84	ILMN_2243516	C11orf63
1579	0.0103277	0.0798	0.0106	245.24	230.08	1.07	ILMN_1660193	ZNF529
1580	0.0103629	0.08	0.0094	138.06	128.48	1.07	ILMN_1683859	SLC7A1
1581	0.010367	0.08	0.0119	409.82	386.54	1.06	ILMN_1681890	DYNLT3
1582	0.0103898	0.0801	0.0118	507.81	405.24	1.25	ILMN_2391861	GSTM1
1583	0.0103968	0.0801	0.008	236.49	254.24	0.93	ILMN_1692948	CCDC90B
1584	0.0104286	0.0803	0.0113	121.55	145.97	0.83	ILMN_1711453	CLEC12A
1585	0.0104319	0.0803	0.0097	124.31	139.92	0.89	ILMN_2408543	PLAUR
1586	0.0104545	0.0804	0.0113	100.87	94.82	1.06	ILMN_1699022	ENDOD1
1587	0.0104983	0.0807	0.0095	420.59	396.97	1.06	ILMN_1678546	PEX11B
1588	0.0105061	0.0807	0.0097	1665.7	1486.56	1.12	ILMN_1658494	C13orf15
1589	0.0105144	0.0807	0.0114	70.66	75.75	0.93	ILMN_2244653	CDC14A
1590	0.0105164	0.0807	0.0105	265.31	290.24	0.91	ILMN_1792885	CTSC
1591	0.0105223	0.0807	0.0098	676.78	634.84	1.07	ILMN_3238274	BTBD2
1592	0.0105321	0.0807	0.0101	459.17	426.09	1.08	ILMN_1679796	TOMM20
1593	0.0105512	0.0808	0.0121	102.36	113.92	0.9	ILMN_1747251	LTB4R
1594	0.0105527	0.0808	0.0105	337.58	385.09	0.88	ILMN_2070043	PPM1K
1595	0.0105658	0.0808	0.0099	74.42	70.31	1.06	ILMN_2368617	FKRP
1596	0.0105679	0.0808	0.0102	4262.28	4015.48	1.06	ILMN_1659762	BTF3
1597	0.0105718	0.0808	0.0072	576.92	540.8	1.07	ILMN_1732810	SNX17
1598	0.0106269	0.0811	0.0102	224.87	244.95	0.92	ILMN_3283090	LOC391169
1599	0.010651	0.0812	0.0087	103.05	96.51	1.07	ILMN_1812973	RRP1B
1600	0.0106525	0.0812	0.0099	84.89	91.98	0.92	ILMN_3231596	PLXNA4
1601	0.0106628	0.0812	0.011	59.8	64.38	0.93	ILMN_2149952	FLJ45256
1602	0.0106635	0.0812	0.0093	68.98	63.59	1.08	ILMN_1739815	NLRP12
1603	0.0106701	0.0812	0.0102	53.35	50.34	1.06	ILMN_1740426	RASD1
1604	0.0106755	0.0812	0.011	299.93	320.13	0.94	ILMN_2403994	RALY
1605	0.0107257	0.0815	0.0111	133.42	124.15	1.07	ILMN_2398865	VPS13C
1606	0.0107623	0.0818	0.0099	2000.45	1851.58	1.08	ILMN_1756501	ST6GAL1
1607	0.0108073	0.0821	0.0105	295.28	317.71	0.93	ILMN_3301168	LOC730052
1608	0.0108137	0.0821	0.0106	553.13	634.55	0.87	ILMN_2376108	PSMB9
1609	0.0108595	0.0824	0.0119	253.78	237.22	1.07	ILMN_1700231	IP6K1
1610	0.0109321	0.0828	0.0122	93.15	86.79	1.07	ILMN_1775330	C15orf52
1611	0.0109462	0.0828	0.0103	1635.21	1770.43	0.92	ILMN_1669424	LOC646531
1612	0.0109579	0.0828	0.0105	294.2	324.55	0.91	ILMN_1660027	FCGR2B
1613	0.010959	0.0828	0.0124	62.6	66.34	0.94	ILMN_2224034	CETN3
1614	0.010962	0.0828	0.0099	139.99	124.52	1.12	ILMN_3235003	LOC100132395
1615	0.0109649	0.0828	0.0127	144.75	153.37	0.94	ILMN_2413318	C15orf57
1616	0.010974	0.0829	0.0109	109.7	118.67	0.92	ILMN_3236458	AK2P2
1617	0.0110088	0.0831	0.0107	141.25	151.45	0.93	ILMN_2131756	LRRC40
1618	0.0110198	0.0831	0.0099	90.44	98.72	0.92	ILMN_2383727	ATG4C
1619	0.011032	0.0831	0.0104	101.02	108.86	0.93	ILMN_2094262	AMY1B
1620	0.0110364	0.0831	0.0104	74.11	68.94	1.08	ILMN_1657509	TSEN54
1621	0.0110779	0.0834	0.0085	43.56	47.07	0.93	ILMN_1814311	LOC653559
1622	0.0110918	0.0834	0.0091	273.33	299.27	0.91	ILMN_1726667	LOC648638
1623	0.0110971	0.0834	0.0087	225.75	213.01	1.06	ILMN_2092756	TMEM109
1624	0.0111275	0.0835	0.0108	111.44	104.7	1.06	ILMN_2331658	C3orf17
1625	0.0111323	0.0835	0.0107	1397.83	1538.5	0.91	ILMN_3247256	LOC646996
1626	0.011133	0.0835	0.0041	39.05	42.19	0.93	ILMN_3209806	LOC642458
1627	0.0111403	0.0835	0.011	504.88	476.64	1.06	ILMN_1745904	CCDC6
1628	0.0111763	0.0837	0.0115	88.35	93.71	0.94	ILMN_2136423	MARS2
1629	0.0111819	0.0837	0.0093	386.08	417.87	0.92	ILMN_1753712	STX10
1630	0.0111854	0.0837	0.011	1394.6	1313.3	1.06	ILMN_2410540	CASP2
1631	0.0112098	0.0838	0.0131	69.33	79.1	0.88	ILMN_2125590	LOC401252
1632	0.0112107	0.0838	0.0085	302.28	278.92	1.08	ILMN_2406410	RHBDD2
1633	0.0112135	0.0838	0.01	89.32	97.48	0.92	ILMN_1737878	FLJ34047
1634	0.0112345	0.0839	0.0103	343.78	428.43	0.8	ILMN_3275275	LOC727962
1635	0.0112457	0.0839	0.0061	52.07	59.25	0.88	ILMN_1701716	LOC649088
1636	0.0112593	0.084	0.0106	148.2	164.04	0.9	ILMN_3255971	LOC100129645
1637	0.0113071	0.0843	0.0111	52.67	56.97	0.92	ILMN_1734748	LILRA1
1638	0.0113257	0.0844	0.0107	255.44	279.91	0.91	ILMN_1780711	LOC390530
1639	0.0113557	0.0845	0.0112	1430.6	1315.95	1.09	ILMN_1680403	SSR4
1640	0.0114154	0.0849	0.0097	68.87	74.13	0.93	ILMN_1788196	MSL3
1641	0.0114358	0.085	0.0116	179.94	159.75	1.13	ILMN_1751559	C16orf30
1642	0.0114398	0.085	0.0119	262.03	242.9	1.08	ILMN_3242883	AGAP8
1643	0.0114499	0.085	0.011	123.25	130.54	0.94	ILMN_3307742	CAPS2
1644	0.0114737	0.0851	0.0122	352.8	332.3	1.06	ILMN_1800164	PPFIA1
1645	0.0114738	0.0851	0.0101	259.18	243.34	1.07	ILMN_1729237	CYB5R1
1646	0.0114826	0.0851	0.0118	139.32	130.1	1.07	ILMN_2052871	TMEM116
1647	0.0115162	0.0852	0.012	307.31	282.3	1.09	ILMN_2044453	LPAR5
1648	0.0115176	0.0852	0.0102	253.28	293.16	0.86	ILMN_3226214	LOC728755
1649	0.0115183	0.0852	0.0108	607.06	681.79	0.89	ILMN_3277297	LOC391825
1650	0.0115537	0.0854	0.0098	975.11	920.58	1.06	ILMN_1669206	CNOT1
1651	0.0115689	0.0855	0.0108	59.9	63.78	0.94	ILMN_3181503	ARL17B
1652	0.0115933	0.0856	0.0139	154.24	172.37	0.89	ILMN_3274339	LOC391655
1653	0.0115993	0.0856	0.0115	1429.99	1306.19	1.09	ILMN_2370825	ATM
1654	0.011606	0.0856	0.0106	130.99	123.72	1.06	ILMN_1791067	TESK1
1655	0.01161	0.0856	0.0123	173.97	192.47	0.9	ILMN_1734149	LOC388122
1656	0.011623	0.0856	0.0124	141.74	154.74	0.92	ILMN_2129015	AFF1
1657	0.0116562	0.0858	0.0056	32.7	34.98	0.93	ILMN_1788664	KCNH7
1658	0.0116717	0.0859	0.0109	995.7	902.49	1.1	ILMN_1751400	SKAP1
1659	0.0116746	0.0859	0.0123	2038.2	1856.26	1.1	ILMN_2391765	C6orf48
1660	0.0117	0.0859	0.0109	52.61	55.9	0.94	ILMN_1777555	ESF1
1661	0.0117017	0.0859	0.0111	254.69	235.11	1.08	ILMN_1765326	DGKD
1662	0.0117061	0.0859	0.0111	246.51	232.8	1.06	ILMN_1705871	DDHD2
1663	0.0117224	0.086	0.0126	97.69	89.46	1.09	ILMN_2094875	ABCB1
1664	0.0117374	0.0861	0.0116	79.33	84.63	0.94	ILMN_1717852	USH1G
1665	0.0117519	0.0861	0.0114	256.05	288.47	0.89	ILMN_1699836	LSP1
1666	0.0118162	0.0864	0.0114	172.62	183.56	0.94	ILMN_2273261	FBXO3
1667	0.0118167	0.0864	0.0122	500.14	467.52	1.07	ILMN_1723729	RSL1D1
1668	0.0118188	0.0864	0.0123	984.75	1115.59	0.88	ILMN_3178890	LOC100130624
1669	0.0118209	0.0864	0.0103	374.1	418.88	0.89	ILMN_2262044	PARP10
1670	0.011828	0.0864	0.0115	187.31	175.96	1.06	ILMN_1679071	MTX3
1671	0.0118292	0.0864	0.0105	112.92	122.38	0.92	ILMN_2295252	C9orf72
1672	0.0118537	0.0865	0.0139	249.63	231.22	1.08	ILMN_1764362	LYAR
1673	0.0118693	0.0866	0.0119	2586.7	2422.13	1.07	ILMN_3199780	LOC401076
1674	0.0118786	0.0866	0.0116	2832.89	2566.29	1.1	ILMN_2166831	RPS4X
1675	0.0118894	0.0866	0.011	123.61	113.57	1.09	ILMN_1697529	RNF10
1676	0.0118993	0.0866	0.0108	339.01	362.58	0.93	ILMN_1741782	SS18
1677	0.0119277	0.0867	0.0128	600.07	563.93	1.06	ILMN_1661833	ANKRD12
1678	0.0119281	0.0867	0.0124	659.45	702.65	0.94	ILMN_3219455	LOC644745
1679	0.0119308	0.0867	0.0116	56.51	53.35	1.06	ILMN_3239240	POLR2E
1680	0.0119832	0.087	0.0114	73.77	80.6	0.92	ILMN_1863656
1681	0.0120512	0.0875	0.0109	79.31	84.22	0.94	ILMN_2257015	AGER
1682	0.0120547	0.0875	0.0115	110.35	101.24	1.09	ILMN_2044471	NCR3
1683	0.0120666	0.0875	0.0129	291.3	275.46	1.06	ILMN_3268564	C19orf60
1684	0.0120721	0.0875	0.0103	203.95	178.92	1.14	ILMN_1655595	SERPINE2
1685	0.0120997	0.0876	0.0099	833.91	772.62	1.08	ILMN_1653599	ATP5D
1686	0.01213	0.0878	0.0105	4091.43	3720.89	1.1	ILMN_3287068	LOC728031
1687	0.0121472	0.0879	0.0115	89.28	83.4	1.07	ILMN_2227195	CCDC65
1688	0.0121652	0.0879	0.0111	338.47	318.17	1.06	ILMN_1657862	AHCY
1689	0.0121924	0.0881	0.0124	107.73	127.04	0.85	ILMN_2126706	LMNB1
1690	0.0122251	0.0883	0.0108	1545.21	1728.07	0.89	ILMN_1690114	PTPLAD2
1691	0.0122604	0.0884	0.0108	157.88	148.14	1.07	ILMN_1735415	NUDT16L1
1692	0.0122647	0.0884	0.011	381.35	349.82	1.09	ILMN_1757644	UBE2H
1693	0.012269	0.0884	0.0114	209.85	228.17	0.92	ILMN_1711408	ANXA4
1694	0.0122835	0.0885	0.0116	119.64	112.26	1.07	ILMN_1756631	ZNF526
1695	0.0122922	0.0885	0.0115	72.19	65.82	1.1	ILMN_1795275	USP53
1696	0.0123356	0.0887	0.0127	1048.41	877.51	1.19	ILMN_1688423	FCER1A
1697	0.0123366	0.0887	0.0138	790.36	742.47	1.06	ILMN_2050023	CCDC23
1698	0.0123407	0.0887	0.0122	54.82	57.99	0.95	ILMN_1690519	DHX34
1699	0.0123736	0.0888	0.0118	484	634	0.76	ILMN_1694548	ANXA3
1700	0.0123748	0.0888	0.0127	185.79	197.72	0.94	ILMN_1811480	ADPRHL2
1701	0.0124279	0.0892	0.012	508.05	571.04	0.89	ILMN_2355225	LSP1
1702	0.0124596	0.0893	0.0111	63.17	67.75	0.93	ILMN_1785345	GPR84
1703	0.012505	0.0896	0.0122	78.95	101.85	0.78	ILMN_1670305	SERPING1
1704	0.0125087	0.0896	0.0108	475.02	506.06	0.94	ILMN_1802906	LOC646900
1705	0.0125354	0.0897	0.0144	71.03	77.18	0.92	ILMN_2384216	XRN1
1706	0.0125436	0.0897	0.0113	106.62	91.7	1.16	ILMN_1671686	EPB49
1707	0.0125648	0.0898	0.0136	92.34	101.36	0.91	ILMN_3248941	C6orf225
1708	0.0125883	0.0899	0.0124	64.27	59.16	1.09	ILMN_1665332	LOC653157
1709	0.012592	0.0899	0.0101	1835.67	1705.5	1.08	ILMN_1807455	DHRS7
1710	0.0126105	0.0899	0.0113	67.88	73.21	0.93	ILMN_2325337	APOL2
1711	0.0126112	0.0899	0.0119	70.33	66.55	1.06	ILMN_2227533	ABHD14B
1712	0.0126117	0.0899	0.0114	444.52	471.98	0.94	ILMN_2362293	FBXO38
1713	0.0126248	0.0899	0.0116	132.34	125.2	1.06	ILMN_1741954	SMYD3
1714	0.0126432	0.09	0.0116	132.19	121.73	1.09	ILMN_2058975	KIAA0776
1715	0.0126541	0.09	0.013	141.87	133.98	1.06	ILMN_1743677	HNRNPU
1716	0.0126747	0.0901	0.0116	1374.58	1537.31	0.89	ILMN_2326512	CASP1
1717	0.0126749	0.0901	0.0125	161.88	171.56	0.94	ILMN_1765825	WDR23
1718	0.0127165	0.0903	0.0108	108.67	114.89	0.95	ILMN_1698402	NFX1
1719	0.0127355	0.0904	0.0135	82.32	77.58	1.06	ILMN_1793002	C20orf196
1720	0.012738	0.0904	0.0102	86.21	80.77	1.07	ILMN_1806198	VSIG1
1721	0.012768	0.0905	0.0115	156.15	146.86	1.06	ILMN_1722953	USP47
1722	0.012802	0.0907	0.013	496.42	553.14	0.9	ILMN_1781085	BRDG1
1723	0.0128092	0.0907	0.0118	134.44	126.96	1.06	ILMN_2374076	C14orf102
1724	0.0128387	0.0909	0.0145	90.45	83.34	1.09	ILMN_1668984	SPNS3
1725	0.012845	0.0909	0.0106	64.2	59.61	1.08	ILMN_2330552	CDC2L2
1726	0.0129181	0.0913	0.0104	98.24	105.44	0.93	ILMN_1772163	PRKY
1727	0.0129996	0.0918	0.013	181.34	211.16	0.86	ILMN_1668865	SLC2A14
1728	0.0130239	0.092	0.0118	2529.54	2391.81	1.06	ILMN_1806908	PRKCB1
1729	0.0130479	0.0921	0.0119	76.47	81.1	0.94	ILMN_1783303	HSP90AB4P
1730	0.0130723	0.0922	0.0124	115.03	122.1	0.94	ILMN_1683328	IP6K2
1731	0.013087	0.0922	0.0138	209.27	197.89	1.06	ILMN_1790412	FLJ39639
1732	0.0130912	0.0922	0.0125	8481.04	7922.9	1.07	ILMN_3205162	LOC646688
1733	0.0131252	0.0924	0.0132	908.68	1022.83	0.89	ILMN_3274790	LOC648921
1734	0.0131503	0.0925	0.0133	328.59	296.49	1.11	ILMN_1862909
1735	0.0131568	0.0925	0.0131	169.75	193.58	0.88	ILMN_1658853	ARHGAP25
1736	0.0131604	0.0925	0.0134	5533.07	5104.81	1.08	ILMN_1775243	LOC646766
1737	0.0132121	0.0928	0.0134	147.32	136.68	1.08	ILMN_2259119	PRMT2
1738	0.0132316	0.0929	0.0134	51.96	48.83	1.06	ILMN_1789599	NBL1
1739	0.0132724	0.0931	0.0128	176.05	162.86	1.08	ILMN_1752478	DHRS3
1740	0.0133197	0.0934	0.0127	489.37	453.64	1.08	ILMN_1865764
1741	0.0133405	0.0935	0.0109	129.24	119.86	1.08	ILMN_1713037	PFKL
1742	0.0133489	0.0935	0.0109	341.61	366.26	0.93	ILMN_1713163	SMARCA5
1743	0.0133496	0.0935	0.0134	262.01	298.68	0.88	ILMN_3275106	LOC100131866
1744	0.0133635	0.0935	0.0133	341.62	313.21	1.09	ILMN_3251737	EEF1A1
1745	0.0133757	0.0935	0.0132	77	86.97	0.89	ILMN_1729198	LOC647460
1746	0.0133871	0.0936	0.0158	564.42	497.92	1.13	ILMN_2339835	PTGS1
1747	0.0133999	0.0936	0.0154	115.57	122.31	0.94	ILMN_1676411	PMS2L2
1748	0.0134518	0.0939	0.0136	103.79	96.85	1.07	ILMN_1754842	DLGAP4
1749	0.0134689	0.094	0.0127	3482.31	3779.7	0.92	ILMN_1814039	LOC653086
1750	0.0134872	0.094	0.0134	87.13	80.09	1.09	ILMN_1780700	GUSBL1
1751	0.013514	0.0942	0.0141	946.25	844.34	1.12	ILMN_1665761	BCL11B
1752	0.0135662	0.0944	0.0106	106.81	122.24	0.87	ILMN_1660624	LIMK2
1753	0.0135786	0.0944	0.0124	1133.28	1216.56	0.93	ILMN_1714759	CNIH4
1754	0.0135811	0.0944	0.0125	81.01	86.06	0.94	ILMN_1678904	ENO3
1755	0.0135835	0.0944	0.0116	53.16	50.05	1.06	ILMN_1652366	NLRP7
1756	0.0135848	0.0944	0.0128	2615.39	2464.73	1.06	ILMN_1764494	ATP5A1
1757	0.0135998	0.0944	0.0135	195.57	209.36	0.93	ILMN_3212051	LOC100131810
1758	0.0136141	0.0945	0.0124	47.35	50.22	0.94	ILMN_1705326	LOC653056
1759	0.0136332	0.0945	0.0149	161.83	152.57	1.06	ILMN_3307025	ZDHHC4
1760	0.0136427	0.0945	0.0128	210.94	199.73	1.06	ILMN_1705093	ORC5L
1761	0.0136442	0.0945	0.014	568.22	526.7	1.08	ILMN_1686555	FYN
1762	0.0136668	0.0946	0.0136	1024.33	963.53	1.06	ILMN_2410909	AKT1
1763	0.0136936	0.0947	0.0146	83.63	92.49	0.9	ILMN_1777977	LOC643980
1764	0.0136986	0.0947	0.0143	54.08	58.64	0.92	ILMN_1659639	LOC642120
1765	0.0137008	0.0947	0.0124	141.08	129.65	1.09	ILMN_1794599	SNRPD3
1766	0.0137023	0.0947	0.0128	81.87	88.6	0.92	ILMN_1770293	KLF5
1767	0.0137759	0.0951	0.0154	117.42	111.06	1.06	ILMN_1733799	FAM195B
1768	0.0138449	0.0956	0.0143	1548.37	1463	1.06	ILMN_2382990	HK1
1769	0.0138862	0.0957	0.013	213.22	240.57	0.89	ILMN_3287309	LOC390578
1770	0.0138874	0.0957	0.0144	109.52	103.74	1.06	ILMN_1694041	PDCL
1771	0.0139243	0.0959	0.0118	68.85	72.67	0.95	ILMN_1771618	FLJ37396
1772	0.0140089	0.0964	0.0135	308.58	344.59	0.9	ILMN_1705241	TDRD7
1773	0.0140094	0.0964	0.0127	727.47	783.45	0.93	ILMN_1713759	UBE2J1
1774	0.0140257	0.0965	0.0126	290.49	307.24	0.95	ILMN_2094938	OMA1
1775	0.0140371	0.0965	0.0151	3107.2	3389.19	0.92	ILMN_2041101	ANXA2P1
1776	0.0140831	0.0967	0.0129	70.42	74.71	0.94	ILMN_3187648	LOC100128908
1777	0.0140862	0.0967	0.0144	40.92	43.66	0.94	ILMN_2138856	YOD1
1778	0.014089	0.0967	0.014	178.02	168.12	1.06	ILMN_2145396	AKR7A3
1779	0.0140937	0.0967	0.0144	1084.7	989.56	1.1	ILMN_1810559	RHOQ
1780	0.0141305	0.0968	0.014	3308	3040.22	1.09	ILMN_3211132	LOC645173
1781	0.0141326	0.0968	0.0122	183.99	167.7	1.1	ILMN_3243069	LOC100133692
1782	0.0141427	0.0968	0.013	484.95	521.84	0.93	ILMN_2091375	KRCC1
1783	0.0141868	0.0971	0.0141	9405.81	9952.1	0.95	ILMN_2357386	FKTN
1784	0.0141972	0.0971	0.0148	127.48	137.98	0.92	ILMN_1755123	GBA
1785	0.0142352	0.0973	0.0136	1723.68	1630.86	1.06	ILMN_1733927	TCEB2
1786	0.0142407	0.0973	0.0144	971.64	894.96	1.09	ILMN_1713751	ADAM19
1787	0.0142513	0.0973	0.0136	469.16	511.05	0.92	ILMN_3197732	LOC441642
1788	0.0142996	0.0976	0.0137	358.73	406.34	0.88	ILMN_1703108	UBE2L6
1789	0.0143645	0.098	0.0149	57.94	54.18	1.07	ILMN_1690209	C1orf186
1790	0.014388	0.0981	0.015	262.16	247.34	1.06	ILMN_1796497	PIP3-E
1791	0.0144036	0.0981	0.0125	109.42	120.69	0.91	ILMN_1664353	LOC644655
1792	0.0144175	0.0982	0.0115	118.44	107.67	1.1	ILMN_2405602	OSBPL1A
1793	0.0144684	0.0984	0.0148	62.33	58.28	1.07	ILMN_1671486	HOMER2
1794	0.0144758	0.0984	0.0134	66.6	62.52	1.07	ILMN_3239272	SNORD71
1795	0.0144859	0.0984	0.0131	542.99	596.36	0.91	ILMN_2224103	PAPSS1
1796	0.0144861	0.0984	0.012	104.7	97.55	1.07	ILMN_3236935	LOC728908
1797	0.0145052	0.0985	0.0139	5526.59	5998.65	0.92	ILMN_2073307	IL10
1798	0.0145759	0.0989	0.0133	251.67	275.6	0.91	ILMN_2405521	MTHFD2
1799	0.014592	0.099	0.0171	254.83	238.97	1.07	ILMN_1681437	DCXR
1800	0.0146092	0.099	0.0123	1949.63	2160.03	0.9	ILMN_2326509	CASP1
1801	0.0146366	0.0992	0.0132	1835.22	1995.93	0.92	ILMN_2066066	HLA-DRB6
1802	0.0146666	0.0993	0.0129	445.07	415.16	1.07	ILMN_1778523	KLF9
1803	0.0146848	0.0994	0.0141	68.7	74.1	0.93	ILMN_3238028	SNORD58B
1804	0.0146924	0.0994	0.0142	281.2	341.65	0.82	ILMN_2349061	IRF7
1805	0.0146967	0.0994	0.0147	1612.72	1502.04	1.07	ILMN_1774334	HIGD2A
1806	0.0147049	0.0994	0.0141	52.07	60.23	0.86	ILMN_1690241	BATF2
1807	0.0147276	0.0995	0.0151	82.58	78.1	1.06	ILMN_1685855	UBN2
1808	0.0147639	0.0996	0.0129	439.98	411.98	1.07	ILMN_1771057	XAB2
1809	0.0148395	0.1	0.0156	1168.45	1050.22	1.11	ILMN_1769911	SLC38A1
1810	0.0148521	0.1	0.0138	107.36	100.43	1.07	ILMN_1672022	EPHA4
1811	0.014875	0.1	0.0163	3938.56	3680.84	1.07	ILMN_3262025	LOC100127993
1812	0.014876	0.1	0.0135	156.46	137.53	1.14	ILMN_1799028	TSPAN5
1813	0.0148771	0.1	0.0157	57.37	54.1	1.06	ILMN_1766159	MIER2
1814	0.0148772	0.1	0.014	204.59	192.05	1.07	ILMN_1726064	PAK1IP1
1815	0.0149295	0.1	0.0141	2203.57	2413.43	0.91	ILMN_1711073	LOC653489
1816	0.0149543	0.1	0.0148	435.34	397.09	1.1	ILMN_1800855	PPTC7
1817	0.0149616	0.1	0.0147	91.89	86.16	1.07	ILMN_1704369	LIMA1
1818	0.0149633	0.1	0.0166	166.98	151.92	1.1	ILMN_1659077	CD40LG
1819	0.0149796	0.1	0.0163	2103.32	1920.45	1.1	ILMN_1779214	ATM
1820	0.0150122	0.101	0.0137	371.12	341.03	1.09	ILMN_2100689	MAP2K4
1821	0.0150193	0.101	0.0151	308.02	284.29	1.08	ILMN_1748827	LOC388564
1822	0.0150241	0.101	0.0139	355.77	383.9	0.93	ILMN_2186678	C6orf211
1823	0.0150306	0.101	0.0153	106.52	125.39	0.85	ILMN_2256050	SERPINA1
1824	0.0150648	0.101	0.0148	199.39	187.7	1.06	ILMN_1696532	RBBP5
1825	0.0150808	0.101	0.0132	71.46	67.7	1.06	ILMN_2166524	CCNYL1
1826	0.0150811	0.101	0.0146	100.76	111.17	0.91	ILMN_1775444	FLJ12078
1827	0.0150837	0.101	0.0143	286.67	270.07	1.06	ILMN_2313074	DEDD
1828	0.0150891	0.101	0.0155	380.89	357.02	1.07	ILMN_1731648	FOXJ2
1829	0.0151484	0.101	0.0151	105.36	91.55	1.15	ILMN_1681411	LOC642178
1830	0.0151856	0.101	0.0157	418.51	394.28	1.06	ILMN_1682449	ZNF518B
1831	0.0152412	0.102	0.0141	7877.93	7454.24	1.06	ILMN_3225761	MGC87895
1832	0.0152514	0.102	0.0145	546.41	615.18	0.89	ILMN_1782611	LOC643870
1833	0.0152609	0.102	0.0148	72.48	78.24	0.93	ILMN_1874362
1834	0.015314	0.102	0.0151	330.82	306.7	1.08	ILMN_1809139	AHCTF1
1835	0.0153164	0.102	0.0141	878.64	956.76	0.92	ILMN_1737406	KLF6
1836	0.0153598	0.102	0.014	151.89	163.13	0.93	ILMN_3223181	SEC13
1837	0.0153651	0.102	0.0144	135.55	145.16	0.93	ILMN_1815283	SULT1A3
1838	0.0153827	0.102	0.0148	951.62	879.3	1.08	ILMN_1655913	NUCB2
1839	0.0153908	0.102	0.0183	67.57	61.17	1.1	ILMN_1811468	IRX3
1840	0.0154134	0.102	0.0137	1034.92	1106.41	0.94	ILMN_1782488	RNASEH2B
1841	0.0154332	0.102	0.0142	239.55	265.37	0.9	ILMN_3220934	NCRNA00152
1842	0.0154529	0.102	0.0151	86.09	91.48	0.94	ILMN_1778788	AMOTL2
1843	0.0154657	0.102	0.0132	153.48	142.85	1.07	ILMN_2093775	ZNF831
1844	0.0154727	0.102	0.0145	364.74	386.61	0.94	ILMN_3200717	LOC643387
1845	0.015513	0.103	0.0158	131.71	123.82	1.06	ILMN_1653180	TPM4
1846	0.0155424	0.103	0.0156	882.03	1012.08	0.87	ILMN_2042651	EVI2B
1847	0.0155565	0.103	0.0144	144.04	131.11	1.1	ILMN_1671891	PID1
1848	0.0155799	0.103	0.014	84.15	79.77	1.05	ILMN_1743456	ZCCHC14
1849	0.0155906	0.103	0.0155	66.72	62.58	1.07	ILMN_1853824	MGAT3
1850	0.0156035	0.103	0.0145	230.01	252.89	0.91	ILMN_1801456	CROP
1851	0.0156073	0.103	0.0167	142.28	157.43	0.9	ILMN_1699383	POLR2J4
1852	0.0156352	0.103	0.0136	310.82	289.77	1.07	ILMN_1685170	ANXA11
1853	0.0156564	0.103	0.0181	202.05	213.31	0.95	ILMN_3246315	LOC100133697
1854	0.0157055	0.103	0.0173	276.1	322.03	0.86	ILMN_1811221	SLC5A8
1855	0.0157196	0.103	0.0146	347.87	304.96	1.14	ILMN_3234762	RN5S9
1856	0.0157561	0.104	0.0148	133.05	142.23	0.94	ILMN_3254413	LOC100129426
1857	0.0157578	0.104	0.0149	1171.27	1313.19	0.89	ILMN_2222101	N4BP2
1858	0.015766	0.104	0.0153	196.31	184.37	1.06	ILMN_1719290	CRYZL1
1859	0.0157757	0.104	0.0124	693.39	755.92	0.92	ILMN_1739583	ROCK1
1860	0.0157927	0.104	0.014	871.23	808.65	1.08	ILMN_2355033	KIAA1147
1861	0.0157996	0.104	0.0145	210.2	234.5	0.9	ILMN_2270845	WDR74
1862	0.0158267	0.104	0.0145	298.54	271.24	1.1	ILMN_2320330	MAL
1863	0.0158589	0.104	0.017	75.18	68.62	1.1	ILMN_1698668	NR1D2
1864	0.0158853	0.104	0.0139	4463.65	4822.6	0.93	ILMN_3244728	LOC100134159
1865	0.0158897	0.104	0.0172	132.3	142.04	0.93	ILMN_1698213	RBM3
1866	0.0158944	0.104	0.0148	429.35	394.35	1.09	ILMN_1724066	PLCB2
1867	0.0158995	0.104	0.0123	233.6	211.83	1.1	ILMN_1728799	FBP1
1868	0.0159296	0.104	0.0143	616.05	538.72	1.14	ILMN_1725417	NELL2
1869	0.0159399	0.104	0.0162	174.37	187.22	0.93	ILMN_1742324	C1orf9
1870	0.0159448	0.104	0.0163	831.06	1007.14	0.83	ILMN_2105253	PTGR2
1871	0.0159764	0.104	0.0146	431.77	396.47	1.09	ILMN_1799614	PNPLA6
1872	0.0160032	0.104	0.016	291.66	312.08	0.93	ILMN_1717745	TIAL1
1873	0.016036	0.104	0.0176	171.2	159.12	1.08	ILMN_1816244
1874	0.0160386	0.104	0.0167	99.19	111.62	0.89	ILMN_1788237	LOC652755
1875	0.0160478	0.104	0.0157	370.13	409.44	0.9	ILMN_2184789	HSCB
1876	0.0160764	0.104	0.0146	74.63	84.77	0.88	ILMN_1859584
1877	0.0160826	0.104	0.0173	197.46	209.95	0.94	ILMN_2128358	TPP2
1878	0.0161166	0.104	0.0144	235.66	218.52	1.08	ILMN_2286514	GTPBP8
1879	0.0161166	0.104	0.0144	117.9	129.64	0.91	ILMN_1780496	MGC12760
1880	0.0161181	0.104	0.017	1909.96	1778.73	1.07	ILMN_1665280	SPCS1
1881	0.0161193	0.104	0.0156	126.58	134.4	0.94	ILMN_2385191	QRICH1
1882	0.0161216	0.104	0.0148	5431.63	5796.13	0.94	ILMN_2316974	LILRB1
1883	0.0161231	0.104	0.015	712.35	650.05	1.1	ILMN_1739641	MTMR3
1884	0.0161253	0.104	0.0161	63.21	59.36	1.06	ILMN_1788886	TOX
1885	0.0161475	0.105	0.0157	4011.08	4329.1	0.93	ILMN_3231881	LOC728026
1886	0.0161571	0.105	0.0174	1094.08	1031.68	1.06	ILMN_1683660	EIF3H
1887	0.0161897	0.105	0.0149	167.73	190.4	0.88	ILMN_1661519	KIAA0408
1888	0.016199	0.105	0.0146	54.7	58.12	0.94	ILMN_2143011	DLEU2L
1889	0.016229	0.105	0.0158	9578.13	9037.49	1.06	ILMN_1659095	LOC644029
1890	0.0162307	0.105	0.014	110.66	103.54	1.07	ILMN_1724009	SETD6
1891	0.0162404	0.105	0.0159	82	77.56	1.06	ILMN_1814165	SSBP3
1892	0.0162482	0.105	0.0129	524.02	552.8	0.95	ILMN_1660270	C7orf28A
1893	0.0162706	0.105	0.0152	534.31	747.62	0.71	ILMN_2054019	ISG15
1894	0.016295	0.105	0.0165	126.03	139.58	0.9	ILMN_1710844	PARP10
1895	0.0163149	0.105	0.0165	115.14	127.99	0.9	ILMN_3291673	LOC100131452
1896	0.0163221	0.105	0.0161	375.6	403.9	0.93	ILMN_3263918	LOC100129201
1897	0.0163342	0.105	0.0165	203.76	187.01	1.09	ILMN_1726928	TCEA3
1898	0.0163516	0.105	0.0164	64.31	71.14	0.9	ILMN_1781001	SOCS3
1899	0.0163665	0.105	0.0173	197.96	177.07	1.12	ILMN_1695719	EIF2C2
1900	0.0163922	0.105	0.0159	1813.6	1951.25	0.93	ILMN_1773154	NFKBIA
1901	0.0164062	0.105	0.0163	444.12	405.93	1.09	ILMN_1906187
1902	0.0164233	0.105	0.0178	587.56	541.21	1.09	ILMN_1788607	RPL23A
1903	0.0164267	0.105	0.0168	295.19	345.03	0.86	ILMN_1674789	LOC651738
1904	0.016466	0.105	0.0159	4897.88	4645.6	1.05	ILMN_1769118	41161
1905	0.0164684	0.105	0.0144	76.65	71.65	1.07	ILMN_1708059	USP13
1906	0.0164964	0.106	0.0186	111.46	122.22	0.91	ILMN_1768392	LOC648059
1907	0.0164968	0.106	0.0165	151.82	174.1	0.87	ILMN_2312228	FUT6
1908	0.0164974	0.106	0.0173	187.48	204.64	0.92	ILMN_3276861	LOC441013
1909	0.0165256	0.106	0.0135	154.92	132.22	1.17	ILMN_1703049	AKAP7
1910	0.0165487	0.106	0.0171	136.4	148.1	0.92	ILMN_3274711	LOC392501
1911	0.0165655	0.106	0.0144	76.47	72.36	1.06	ILMN_1715680	NEIL2
1912	0.0165891	0.106	0.0156	68.37	64.43	1.06	ILMN_3298163	LOC729683
1913	0.0165945	0.106	0.0146	379.95	422.12	0.9	ILMN_3235006	LOC728105
1914	0.016612	0.106	0.0132	94.21	87.95	1.07	ILMN_1677186	MGC52498
1915	0.0166374	0.106	0.0133	133.81	118.04	1.13	ILMN_3251137	FAM119A
1916	0.0166507	0.106	0.0168	404.46	440.6	0.92	ILMN_3216365	LOC100131096
1917	0.0166509	0.106	0.0161	368.95	423.59	0.87	ILMN_2412214	LGALS9
1918	0.0166675	0.106	0.0145	58.88	62.6	0.94	ILMN_1815447	LOC401623
1919	0.0166987	0.106	0.0162	382.27	350.73	1.09	ILMN_2337974	PKIA
1920	0.0167325	0.106	0.0147	78.19	73	1.07	ILMN_1666885	ATRX
1921	0.0167598	0.106	0.0186	90	84.91	1.06	ILMN_1680344	MYOM1
1922	0.0167826	0.106	0.0167	40.72	43.08	0.95	ILMN_1774997	BCL2L11
1923	0.0167846	0.106	0.0158	312.87	374.12	0.84	ILMN_1681301	AIM2
1924	0.0167869	0.106	0.0179	92.41	86.16	1.07	ILMN_3235096	SNORA28
1925	0.0167876	0.106	0.0165	434.37	412.09	1.05	ILMN_1657993	ADNP
1926	0.01679	0.106	0.0145	2894.93	2738.01	1.06	ILMN_1768197	ROD1
1927	0.0168201	0.106	0.0174	111.3	105.13	1.06	ILMN_1663035	SREBF1
1928	0.0168213	0.106	0.0129	34.92	37.13	0.94	ILMN_1656088	C1orf110
1929	0.0168861	0.107	0.0154	9357.82	8868.41	1.06	ILMN_3202432	LOC644464
1930	0.0168946	0.107	0.0158	202.64	232.94	0.87	ILMN_1654504	CLEC7A
1931	0.0169274	0.107	0.0169	247.24	286.02	0.86	ILMN_2091707	LOC123688
1932	0.0169311	0.107	0.0156	99.74	110.84	0.9	ILMN_2061979	LOC440093
1933	0.0169343	0.107	0.016	81.28	75.7	1.07	ILMN_2179873	PHC3
1934	0.0169535	0.107	0.0164	340.91	389.3	0.88	ILMN_1727165	LOC644852
1935	0.0169887	0.107	0.0145	153.66	144.81	1.06	ILMN_1732615	ASMTL
1936	0.0169953	0.107	0.0174	187.66	174.54	1.08	ILMN_1775508	CYLD
1937	0.0170116	0.107	0.0167	67.94	64.29	1.06	ILMN_1794074	MXI1
1938	0.0170179	0.107	0.0172	37.76	40.99	0.92	ILMN_1799575	IL19
1939	0.017019	0.107	0.0162	161.77	177.27	0.91	ILMN_2103362	ARHGAP27
1940	0.017023	0.107	0.0183	959.28	904.88	1.06	ILMN_1772261	GLG1
1941	0.0170659	0.107	0.0178	50.19	46.47	1.08	ILMN_1663648	MTUS1
1942	0.0170739	0.107	0.0175	94.26	100.02	0.94	ILMN_3248844	WASH2P
1943	0.0170739	0.107	0.018	325.18	350.52	0.93	ILMN_1765222	CARS2
1944	0.0171151	0.107	0.0165	259.65	236.28	1.1	ILMN_1752741	TRIM23
1945	0.0171258	0.107	0.016	794.88	738.03	1.08	ILMN_1782385	POLR2A
1946	0.0171444	0.107	0.0166	173.67	191.51	0.91	ILMN_1705663	DMXL2
1947	0.0171456	0.107	0.0154	57.69	61.75	0.93	ILMN_1686706	SIGLEC7
1948	0.0171541	0.107	0.0161	101.81	94.06	1.08	ILMN_1656420	MGC3020
1949	0.0171578	0.107	0.0163	10111.8	9582.21	1.06	ILMN_1753534	RPS18
1950	0.0171837	0.107	0.0171	469.58	497.76	0.94	ILMN_1785661	FAM108B1
1951	0.0171839	0.107	0.0171	364.23	403.58	0.9	ILMN_2364535	SNUPN
1952	0.0172264	0.108	0.0162	45.75	42.55	1.08	ILMN_1801341	DNHD2
1953	0.0173115	0.108	0.0171	196.31	214.75	0.91	ILMN_1769508	PIGX
1954	0.0173119	0.108	0.0137	69.32	65.21	1.06	ILMN_1815519	EPN2
1955	0.0173243	0.108	0.0173	62.15	65.99	0.94	ILMN_3224555	LOC729397
1956	0.017325	0.108	0.0168	130.69	122.74	1.06	ILMN_1681590	LARP1
1957	0.0173308	0.108	0.0157	68.33	74.3	0.92	ILMN_3252446	LOC100129543
1958	0.0173324	0.108	0.0175	80.6	74.89	1.08	ILMN_2062620	NMT2
1959	0.0173968	0.108	0.016	194.67	174.15	1.12	ILMN_1702447	IGF2BP2
1960	0.0174089	0.108	0.018	47.68	50.27	0.95	ILMN_2091590	ANKRD41
1961	0.0174597	0.109	0.0195	110.89	104.31	1.06	ILMN_1769451	ILVBL
1962	0.017461	0.109	0.0152	60.39	65.63	0.92	ILMN_1681260	LOC643272
1963	0.0174756	0.109	0.0178	266.97	304.64	0.88	ILMN_3301585	LOC730993
1964	0.0174878	0.109	0.0176	1911.17	1805.74	1.06	ILMN_3188984	C20orf199
1965	0.0174957	0.109	0.0161	64.15	57.57	1.11	ILMN_2069224	PVALB
1966	0.0175188	0.109	0.0167	1905.34	1769.19	1.08	ILMN_1694398	EIF3F
1967	0.0175402	0.109	0.0164	59.9	63.93	0.94	ILMN_1813379	TNFRSF9
1968	0.0175507	0.109	0.0187	6520.78	6056.78	1.08	ILMN_3207020	LOC388556
1969	0.0176062	0.109	0.0165	138.82	153.75	0.9	ILMN_2414436	RBM3
1970	0.0176238	0.109	0.0187	458.84	426.83	1.07	ILMN_1748591	ODC1
1971	0.0176248	0.109	0.0186	92.03	86.09	1.07	ILMN_1671969	UGP2
1972	0.017772	0.11	0.0189	896.72	844.33	1.06	ILMN_2366330	FERMT3
1973	0.0177893	0.11	0.0186	453.01	494.95	0.92	ILMN_1671516	CIR1
1974	0.0177916	0.11	0.0164	1335.73	1244.81	1.07	ILMN_1763080	QARS
1975	0.0178203	0.11	0.0186	506.59	536.08	0.95	ILMN_2066348	HERPUD2
1976	0.0178435	0.11	0.0166	339.32	317.97	1.07	ILMN_1696021	KPNA6
1977	0.0178583	0.11	0.0192	228.17	248.66	0.92	ILMN_1756326	CKS2
1978	0.0179197	0.11	0.0186	176.98	167.33	1.06	ILMN_1667510	C12orf65
1979	0.0179207	0.11	0.0169	93.76	104.76	0.89	ILMN_2113333	LGALS9B
1980	0.0179258	0.11	0.0184	60.15	63.44	0.95	ILMN_3266197	LOC100130171
1981	0.0179613	0.111	0.0165	176.97	191.97	0.92	ILMN_1667418	LOC283953
1982	0.0179669	0.111	0.0158	185.72	174.8	1.06	ILMN_1736077	LIAS
1983	0.017987	0.111	0.0175	154.18	163.54	0.94	ILMN_1720243	IL25
1984	0.0179929	0.111	0.0178	119.13	113.04	1.05	ILMN_1862001
1985	0.0180084	0.111	0.0167	340.38	361.33	0.94	ILMN_1705464	MRPL41
1986	0.0180437	0.111	0.0171	58.25	55.27	1.05	ILMN_1722533	KATNAL1
1987	0.0180949	0.111	0.014	35.9	37.99	0.95	ILMN_1757379	OPN1SW
[truncated: 1,065 more rows]

## Sheet: Co-expression Modules
Module Turquoise	Module Blue	Module Brown	Module Yellow	Module Green	Module Red	Module Black	Module Pink	Module Magenta	Module Purple	Module GreenYellow	Module Tan
ABCG1	ABHD14A	ABHD14B	ABHD13	ABCB1	ACER2	ABAT	ACOT9	AAK1	ANP32A	ABCC3	AKAP7
ACAA1	ACOT4	ABL1	ABHD7	ABHD15	ADI1	AGAP8	ACTA2	ADNP2	ANP32C	ALOX12	C19orf6
ACTR2	ACSM3	ACADVL	ACACB	ACAD11	AMY1A	AHCTF1	ADAM19	ALKBH8	ARHGAP10	ARHGAP21	C1orf77
ADAM17	ACYP2	ACD	ACAD8	ACSL1	ATP6V0C	AHNAK	ADPRHL2	ARAP2	ATG3	C10orf47	C20orf108
ADNP	ADCY7	ADAM10	ALG13	ADAM28	BAG4	AKT1	AGPAT3	ARID4B	BRD7P2	C15orf26	CCDC15
AGER	AFF1	AES	AMZ2	ADARB1	BEX1	ANGPT1	AIM2	BBX	C18orf10	C15orf52	CDK5RAP3
AIRE	AHCY	AIP	ANKRD28	AHI1	BLNK	ANKRD12	ANKRD22	C14orf28	C18orf32	C16orf68	CMTM3
AK2P2	AK3	AMY1B	ANXA4	AIF1	BRDG1	ANXA11	ANXA2	C19orf12	C6orf211	C21orf7	CXorf12
AKR1D1	AK5	AMY2B	AP1M2	ALOX5	BUB3	ARAP3	APOBEC3G	C1orf71	C8orf33	C5orf4	DERL2
ALG10B	AKR1C3	AP2A1	ARF6	ALPK1	C11orf73	ARID1A	APOL2	C20orf94	CCDC90A	C7orf41	EPB49
ALPP	AKR7A3	AP2M1	ARFGAP3	ANXA3	C12orf30	ARID4A	APPL2	C22orf34	CD99	CA2	EWSR1
ALS2CR14	AKTIP	APBA2	ARL17B	AP1S1	C14orf19	ASAP1	BATF2	C6orf204	CEP63	CABP5	GALT
AMOTL2	ALDH5A1	ARHGAP25	ARL6IP1	API5	C4orf34	ATG2A	C11orf75	CCDC16	CLEC7A	CDC14B	GBP3
ANKRD36	ALKBH7	ARHGDIA	ASCC3	ARF1	C5orf41	ATP2B4	C17orf87	CDC2L2	CPEB3	CTDSPL	HECTD3
ANKRD44	ANKRD41	ARHGEF18	ATG4C	ARHGAP27	CD47	BATF	C1GALT1	CEP350	CS	CTTN	IGF2BP2
ANXA1	ANXA2P1	ARL5A	AXIN1	ARHGAP9	CECR1	BCL2L11	C1orf85	CEP68	CSNK1A1L	CXCL5	LOC100130255
AP1B1	ANXA2P3	ARMC5	BCAS2	ARHGEF3	CHML	BCORL1	C1QB	CLN8	CWC22	CXorf20	LOC100130562
AP1G2	AP1G1	ASB1	BPGM	ARL4C	CICK0721Q.1	BMPR2	C4orf32	CYLD	DDX3X	DAB2	LOC100132499
ARHGAP17	AP2S1	ASMTL	C14orf11	ARRB2	CLIP1	BRD3	C6orf150	DDX27	EIF2AK1	DKFZp686I15217	LOC130773
ARID2	APOA1BP	ATN1	C15orf21	ATM	CMIP	BRPF3	C9orf109	DFFA	EVI2B	DNHD2	LOC392501
ATG10	AQP12A	ATP5D	C1D	BCL11B	CTSB	C13orf18	C9orf127	DNAJC30	EXOC8	DNM3	LOC641849
ATHL1	ARHGAP30	ATP6V1C1	C1orf9	BCL2	DAP	C14orf43	CABC1	DYRK2	FAM126B	ENDOD1	LOC645968
ATP1B1	ARRDC2	B3GALT6	C20orf55	BCL2A1	DPM3	C15orf57	CALML4	ELF2	FAM91A2	FBLN1	LOC646531
ATP5O	ATP5A1	BAZ1B	C3orf63	BCL6	EIF2C2	C5orf53	CARD16	FAM107B	FCGR3A	FERMT3	LOC727848
ATR	ATP5E	BCAP31	C4orf16	BCOR	EPHA10	CABIN1	CARD17	FNIP2	GABARAPL2	GRAP2	LOC729366
ATRX	ATPGD1	BCKDHA	C4orf43	BIVM	FAM108B1	CAMK1D	CASP1	FYTTD1	HCST	GRASP	LRPAP1
AZIN1	ATXN7L3B	BCL9	C5orf20	BRWD1	FAM13A	CBL	CBX7	GMPPB	HERPUD2	GRB14	LRRC26
B3GAT1	BIN2	BCL9L	C6orf62	BST1	FBP1	CCDC28B	CCL2	GNL3L	HIAT1	GUCY1A3	MIIP
BEGAIN	BRWD2	BCR	C7orf11	C14orf135	FHL3	CCDC97	CCL8	GUSBL1	HOXC6	HGD	MIR98
BIRC3	BTBD2	BMF	C7orf28A	C16orf57	FLJ20444	CCNK	CCRL2	HOOK1	ILVBL	HIST1H2AE	MRPL40
BMP8B	C10orf104	C10orf76	C7orf70	C16orf69	GKAP1	CD300LB	CD1E	IKZF1	ITM2B	HOMER2	NACAP1
BTF3	C10orf35	C12orf32	CAPZA1	C19orf2	GNPDA2	CDC2L6	CD274	IL6ST	KIAA1033	IRX3	NUDT2
BTK	C10orf58	C14orf102	CBWD1	C19orf59	GPSM3	CENTB2	CEACAM1	IL7R	KRT8P9	ITGB5	PIP5K2A
C10orf4	C11orf1	C14orf138	CCAR1	C3orf34	GTF2IRD2B	CEPT1	CERK	ISG20L2	LAPTM4A	LIMS1	RN5S9
C11orf46	C11orf2	C19orf25	CCDC117	C9orf5	HNRNPA1L2	CHES1	CHMP5	KCNA3	LARP1	LOC649260	RNF10
C11orf63	C11orf82	C19orf56	CCDC50	C9orf72	HNRPC	CHPF2	CNIH4	LASS6	LOC100128269	MEIS1	SELS
C14orf32	C12orf29	C19orf60	CCDC82	CALM1	HOXC4	CKS2	CTSF	LOC100130769	LOC100128533	MGC13005	SF4
C14orf82	C12orf65	C1GALT1C1	CCNG1	CASP2	HRSP12	CLASP1	CTSL1	LOC100132707	LOC100128627	MPL	SLC6A10P
C17orf41	C13orf15	C1orf166	CCNY	CASP4	HYALP1	CMTM4	CXorf21	LOC100133692	LOC100128731	MSRB3	SSNA1
C1orf110	C16orf30	C1orf63	CD164	CASP5	ICK	CREBBP	CYB561D1	LOC100133760	LOC100132888	NAT8B	TMEM111
C1orf43	C16orf53	C1orf86	CD84	CBS	JARID1A	CUGBP2	D4S234E	LOC100134624	LOC100133770	NCALD	TNS1
C20orf199	C17orf45	C20orf11	CDC14A	CCDC147	KCTD12	CUTL1	DAPP1	LOC400836	LOC100134291	NDUFS1	TULP4
C21orf66	C19orf39	C20orf29	CENTD1	CD79B	KIF13B	DACH1	DDIT4	LOC646808	LOC389053	PDE5A	UIMC1
C2orf21	C19orf53	C20orf4	CETN3	CD97	LEPROT	DAPK2	DDX58	LOC648509	LOC389286	PTGS1
C2orf69	C1orf151	C3orf17	CHORDC1	CEACAM4	LHFPL2	DBI	DDX60	LOC650737	LOC391769	PVALB
C3orf58	C1QBP	C3orf38	CLIC4	CENTG2	LOC100127893	DGCR8	DDX60L	LOC653080	LOC392288	RGS18
C6orf170	C20orf100	C9orf85	CMTM7	CHCHD2	LOC100128060	DIAPH1	DNAJC7	LOC728608	LOC400948	SDPR
C6orf225	C20orf196	CASP8	COMMD8	CHMP2A	LOC100128410	DPEP2	DTX3L	LOC729513	LOC440093	SLC24A3
C9orf130	C20orf30	CBWD3	COPS2	CIR1	LOC100128548	ELMO1	EEF1A1	LOC729692	LOC440525	SLC8A3
C9orf30	C21orf33	CCDC6	CREM	CLEC4A	LOC100128729	EP300	EIF4B	LOC732360	LOC440926	SOCS4
C9orf80	C22orf29	CCDC86	CROP	CLEC4D	LOC100129067	EPAS1	EPSTI1	LOC92017	LOC442319	SPC25
CACYBP	C22orf32	CCDC90B	CTAGE6	CLIP3	LOC100129243	EPN2	FANCL	MAF	LOC641992	SPG21
CANX	C2orf15	CCNL1	CTNNB1	CMPK1	LOC100129426	EPOR	FBXO6	MEF2C	LOC642567	TAL1
CAPS2	C2orf89	CCT6P1	CYCSP52	COBRA1	LOC100129608	ETFB	FCER1A	NOL9	LOC643896	TCEA3
CARD14	C3orf10	CD3E	CYP20A1	CR1	LOC100129645	FAM101B	FCGR1A	NPAT	LOC644964	TSC22D1
CARS2	C6orf160	CDC25B	DCK	CRYZL1	LOC100129934	FAM120A	FCGR1B	NUCKS1	LOC645052	VWF
CAST	C6orf48	CDK2AP2	DCTN6	CSF2RB	LOC100129982	FAM19A2	FCGR1C	PAPD5	LOC647908	ZNF185
CBFB	CA5B	CENTG3	DDHD1	CXCR3	LOC100130070	FAM65B	FCRL3	PCYOX1	LOC648863	RAB27B
CCDC115	CAMSAP1L1	CHD3	DDX3Y	CXCR6	LOC100130154	FLJ10916	GBP1	PHC3	LOC650638
CCDC59	CBR3	CHD8	DLEU2L	CYFIP2	LOC100130624	FNBP1	GBP2	PHF20L1	LOC732229
CCDC91	CCDC23	CITED4	DMXL1	DBT	LOC100130715	GATAD2A	GBP5	PIP3-E	LOC92249
CCNYL1	CCDC25	CKAP5	DNTTIP2	DCAF16	LOC100130892	GATAD2B	GBP6	PLEKHA1	MBD2
CCR4	CCDC65	CLEC11A	DTWD1	DCAF7	LOC100131076	GATS	GCH1	PPARBP	MRRF
CCS	CCDC72	CLIP2	DYNLT3	DDI2	LOC100131526	GNAI2	GNG5	PPID	NCRNA00081
CD3G	CCT3	CLK1	EEF2K	DENND2D	LOC100131572	GNG7	GPR141	PPM1B	ODC1
CDAN1	CD27	CLSTN1	EIF4E	DHRS7	LOC100131866	GTF3C6	GPR84	PPP2R5E	P704P
CENPV	CD320	CNOT1	ESF1	DHX34	LOC100132037	HCFC1R1	HEBP1	PTPN1	PAPSS2
CEP27	CD3D	CPNE1	ETNK1	DNAJC25-GNG10	LOC100132199	HELZ	HLA-H	RC3H2	PLAGL1
CHM	CD40LG	CRY2	FABP5	DSC2	LOC100132547	HNRPUL1	IFI16	RNU4ATAC	POTE2
CHP	CD6	CSNK1E	FAM26F	EP400	LOC100132652	HSPA1L	IFI27	RPAP2	RBMS1
CLK3	CD74	CTDSP1	FAM72D	EPHA4	LOC100132728	IGF2R	IFI44	RSF1	ROCK1
CNOT7	CDC42SE2	CYB5R1	FBXL3	FAIM3	LOC100132804	IMPA2	IFI44L	SCARNA21	RPAP3
COL24A1	CENPL	CYLN2	FBXO3	FAM116A	LOC100133329	ING3	IFI6	SCARNA5	SDHAF1
CRIPT	CLEC12A	DCTN1	FBXO5	FAM62B	LOC146053	IP6K1	IFIT3	SF1	SENP6
CSDE1	CLEC12B	DDX41	FKRP	FAS	LOC202227	IRS2	IFITM4P	SGK3	SEPT14
CSE1L	CNN3	DDX59	FLJ13611	FBXO21	LOC338799	JARID2	IGF2BP3	SLC36A4	SETD1A
CTDP1	CNNM3	DEDD	FLJ39639	FCGR2C	LOC339799	KBTBD11	IL1RN	SMA5	SH3BP2
CUTC	COMMD7	DGKD	GALNT7	FEZ1	LOC345041	KDM5B	IL27	SMARCC2	STX7
CYCSL1	COX11	DHPS	GFI1B	FFAR2	LOC388122	KDM6B	IL4I1	SNORA12	SYTL2
DCLRE1C	COX7A2L	DHX9	GLTSCR1	FLJ42627	LOC388556	KIAA0247	INADL	SNORD46	TADA1L
DDX46	CRBN	DLEU2	GOLGA8B	FOXK1	LOC390183	KIDINS220	IRF7	SNORD62B	TCEAL4
DKFZp434K191	CRIP1	DLGAP4	GPBP1L1	FOXP1	LOC390578	LAPTM5	IRF9	SNORD71	TFEC
DNAJB14	CRIP2	DMWD	GPN3	FTHL11	LOC390735	LASP1	ISG15	SNORD95	TMX4
DNHL1	CTRL	DMXL2	HCCS	FTHL16	LOC390876	LOC100130932	JUP	SNRPD3	TOP1P2
DOPEY2	CTSC	DNAJB2	HCLS1	FTHL2	LOC391655	LOC100131810	KCNG1	SPIN1	TRAPPC4
EIF2AK4	CUTA	DPP3	HIPK2	FTHL3	LOC391670	LOC100132493	KIAA0319L	SPTAN1	TTRAP
ENO3	CXCR7	DRD4	HK1	FTHL8	LOC391825	LOC100133803	KIF22	SSH1	UBE2D1
EPB41	DAP3	DULLARD	HLA-C	FTO	LOC400389	LOC642035	KIT	TAF1C	UBE2W
ERGIC1	DBP	DUSP22	HMGB1	FTSJ1	LOC400652	LOC644482	KLF9	TCERG1	USP6
ERMN	DCXR	ECHDC1	HMGN3	GBA	LOC401076	LOC644745	KLHL24	TDG	YIPF4
ERVWE1	DDHD2	EDC3	HNRPH1	GK	LOC401537	LOC644877	KREMEN2	THOC2
FABP5L3	DECR2	EIF3D	HNRPH3	GNG10	LOC401717	LOC647460	LACTB	TNIK
FAHD1	DHRS3	EIF5A	HSPA13	GNPTAB	LOC401817	LOC729200	LGALS3BP	TPI1
FAM119A	DIP2B	ENO2	HSPCAL3	GOLGA3	LOC402057	LOC729779	LGALS8	TRIM23
FAM122A	DKFZp761P0423	EPHA1	IMPA1	GPAM	LOC402562	LOC92755	LGALS9	UBE2D2
FAM153B	DLEU1	ERMP1	IQGAP2	GPR68	LOC402677	LPIN2	LGALS9B	UBE2H
FAM40B	DNTT	ESYT1	ITFG1	GPR97	LOC439992	MAP1LC3A	LOC100129681	UBE2O
FAM73A	DSTN	FAM125B	KIAA1279	GRN	LOC440396	MAP2K4	LOC100130520	UBN2
FAM84B	DUSP14	FAM134A	KIAA1704	GRPEL2	LOC440595	MAPKAPK2	LOC100134537	USP13
FBXO38	ECT2	FAM173A	KIF21B	GTF3A	LOC441032	MAPRE3	LOC284672	VPS13B
FBXO44	EDAR	FAM195B	KPNA2	GVIN1	LOC441154	MAST3	LOC389386	VPS13C
FEZ2	EEF1B2	FASTK	LGALS3	HERC1	LOC441155	MED31	LOC400759	WDR73
FKBP1P1	EEF1G	FBXL11	LIG4	HERC2	LOC441642	METTL9	LOC552889	WHAMM
FKTN	EEF2	FBXO31	LIN7C	HIBCH	LOC441907	MGC42367	LOC643384	YTHDC1
FLJ10088	EFCAB2	FICD	LMTK3	HIP1R	LOC442181	MID1IP1	LOC643680	YY1
FLJ12078	EIF2S3	FOXJ2	LOC100127922	HIST2H2AB	LOC442232	MRPL17	LOC644496	ZBTB43
FLJ25363	EIF3F	FXYD5	LOC100128291	HMBOX1	LOC442270	MRPL41	LOC651816	ZFP91
FLJ34047	EIF3G	FYN	LOC100128516	HN1	LOC641727	MTMR3	LOC653496	ZNF12
FLJ37396	EIF3H	GAR1	LOC100128525	HORMAD1	LOC641746	MYH9	LOC654346	ZNF148
FLJ45256	EIF3K	GDPD5	LOC100129139	HPSE	LOC641848	MYO9B	LOC728744	ZNF234
FUT6	EIF3L	GEMIN4	LOC100129445	HSPA9	LOC642222	MYST3	LOC729196	ZNF33A
FZD7	ELA1	GIPC1	LOC100129686	IFNAR2	LOC642236	NCF1B	MAD2L1BP	ZNF364
GABBR1	ELOVL4	GLG1	LOC100129952	IL10RB	LOC642250	NCKAP1L	MEF2D	ZNF562
GALNT3	FAM102A	GOT2	LOC100130000	IL18RAP	LOC642443	NCOR2	MEGF6	CREB1
GCC2	FAM10A4	GRWD1	LOC100130561	IRF5	LOC642738	NCRNA00085	MMP28	FBXO22
GDPD1	FAM134B	HCCA2	LOC100131253	KATNAL1	LOC643007	NDE1	MRPL44	ETS1
GIMAP7	FAM3A	HCFC1	LOC100131349	KIAA0040	LOC643015	NLRX1	MRPS34	TNRC6C
GIYD2	FBLN2	HINT3	LOC100131675	KIAA1026	LOC643387	NR4A2	MS4A14
GMCL1	FBXO32	HNRNPK	LOC100132086	KIAA1147	LOC643534	NUAK2	MS4A4A
GOLPH4	FCGBP	HNRPK	LOC100132395	KIAA1324	LOC643779	NUDCD2	MS4A7
GPR1	FCGR2B	HOOK3	LOC100132425	KIAA1881	LOC643870	OR7E156P	MTHFD2
GPR180	FKBP14	HSP90AB4P	LOC100132521	KLF12	LOC643960	OSBPL8	MXI1
GSDM1	FKBP1A	HVCN1	LOC100132724	KLF6	LOC643980	PACS1	MYB
GSDMB	FLT3LG	HYOU1	LOC100132797	KLRG1	LOC643997	PAK2	NBN
GSTTP2	FOXO1	IDI1	LOC100132920	KREMEN1	LOC644037	PAN3	NDRG3
GTPBP8	GCET2	IFT20	LOC100133034	KTELC1	LOC644315	PARP15	NMI
HEATR3	GDF11	ILF3	LOC100133080	LARP1B	LOC645018	PCBP2	NR3C2
HEMGN	GDI1	INTS1	LOC100133220	LAX1	LOC645630	PDPK1	NT5C3L
HEXDC	GLRX5	IP6K2	LOC100133697	LCLAT1	LOC645691	PELI2	NTNG2
HLA-DRB6	GLTSCR2	IPO13	LOC100134172	LEF1	LOC645693	PHF2	OAS1
HSCB	GOLPH3L	IQCB1	LOC196752	LFNG	LOC645715	PIK3CD	OAS3
ICA1	GPN1	IRAK1	LOC283267	LGMN	LOC645737	PJA2	OASL
IDH2	GPR65	ITGAL	LOC387934	LILRA6	LOC645762	PLCB2	OTOF
IGFL3	GPX4	ITPKB	LOC399881	LIMA1	LOC646197	POLR2A	PAQR4
IL10	GSTM2	KHNYN	LOC400061	LIMK2	LOC646527	PRKCB	PARP10
IL25	GSTM3	KIAA0182	LOC400750	LMNB1	LOC646672	PRKCB1	PARP14
IMMP1L	GSTM4	KIAA1545	LOC401845	LOC100129201	LOC646784	PSMB7	PARP9
ING2	HABP4	KIAA1715	LOC440563	LOC100129637	LOC646909	RAB11FIP1	PFN2
INSM1	HHEX	KPNA6	LOC441956	LOC100129960	LOC646949	RAB11FIP4	PHF11
INTU	HIGD2A	KRTAP19-6	LOC442517	LOC100130171	LOC646956	RAB43	PITPNC1
ISCA1	HIST1H2AD	LDLRAP1	LOC642031	LOC100133077	LOC646966	RAPGEF2	PLSCR1
ITGB1BP1	HM13	LMF2	LOC642033	LOC100134688	LOC647037	RASSF2	PML
KCNH7	HNRNPU	LOC100128994	LOC642073	LOC100170939	LOC647074	RASSF5	PPPDE2
KCTD7	HPCAL4	LOC100129543	LOC642076	LOC253039	LOC648283	RFX1	PSMA3
KHDRBS1	HSH2D	LOC100132444	LOC642585	LOC255809	LOC648343	RNF103	PSMA6
KIAA0408	HSPB1	LOC100133163	LOC642954	LOC283953	LOC648638	ROD1	PSMB8
KIAA0776	IFFO2	LOC100133398	LOC644094	LOC387820	LOC649150	RPS7	PSMB9
KIAA1737	IL23A	LOC147804	LOC644101	LOC388955	LOC649209	RXRA	PTOV1
KIF2A	IL27RA	LOC339192	LOC644131	LOC389168	LOC649839	SEC16A	PTPRO
KLHL20	ILK	LOC389322	LOC644380	LOC390530	LOC649873	SEMA4D	REC8
KLHL28	INPP4B	LOC389816	LOC645086	LOC391045	LOC651064	SERPINB8	RLN2
KRCC1	IRF2	LOC643668	LOC645351	LOC399988	LOC651198	SETD1B	RNF135
KRT40	ITGAX	LOC644063	LOC646821	LOC642083	LOC653105	SF3A1	RPRD2
LCMT2	JAM3	LOC644330	LOC646900	LOC642120	LOC653157	SGK	RPS6KA2
LDHA	KDM1B	LOC644655	LOC648740	LOC642909	LOC653450	SGOL2	RTP4
LEP	KIAA0355	LOC644774	LOC648822	LOC643424	LOC727821	SIK3	SAMD9L
LILRB1	KIAA1430	LOC645236	LOC648907	LOC646785	LOC727970	SIL1	SELL
LLPH	KIAA2026	LOC645251	LOC649214	LOC648984	LOC728060	SLC25A19	SERPING1
LOC100127894	KLF5	LOC645944	LOC649330	LOC651738	LOC728170	SLC44A2	SERTAD2
LOC100127975	KLRB1	LOC646044	LOC649801	LOC651919	LOC728179	SNORA28	SESN1
LOC100128062	KRT73	LOC647195	LOC650321	LOC653056	LOC728416	SP2	SIGLECP3
LOC100128274	LAPTM4B	LOC648526	LOC652113	LOC654096	LOC728973	SPI1	SLAMF8
LOC100128460	LARGE	LOC648749	LOC653316	LOC727762	LOC729143	SREBF1	SLC2A6
LOC100128485	LCK	LOC648980	LOC653324	LOC728002	LOC729255	SRRM2	SMAD5
LOC100128498	LDHB	LOC653115	LOC653486	LOC728093	LOC729342	STK40	SP100
LOC100128908	LDOC1L	LOC653375	LOC654074	LOC728457	LOC729397	TACC1	STAT1
LOC100129055	LGSN	LOC653994	LOC654350	LOC728519	LOC729423	TAF4	TDRD7
LOC100129094	LIAS	LOC654121	LOC728026	LOC728661	LOC729510	TBL1X	TIFA
LOC100129267	LILRA1	LOC728650	LOC728115	LOC730281	LOC729677	TCEB1	TIMM10
LOC100129441	LILRA3	LOC728666	LOC729369	LOC730324	LOC729686	TGFBR2	TMEM51
LOC100129502	LMNB2	LOC728748	LOC729505	LOC730432	LOC729760	THOC4	TNFAIP6
LOC100130053	LOC100124692	LOC728908	LOC729519	LRRK2	LOC729798	TLN1	TNFSF10
LOC100130276	LOC100127993	LOC729843	LOC729652	LTB4R	LOC730382	TMCC1	TNFSF13B
LOC100130289	LOC100128252	LOC730052	LOC729683	LYAR	LOC730746	TMEM126B	TRIM22
LOC100130332	LOC100129424	LOC730316	LOC729687	MAEA	LSM5	TP53INP2	TRIM5
LOC100130550	LOC100130980	LOC731314	LOC729764	MAZ	MAML3	TSC22D3	TRIM78P
LOC100130598	LOC100131662	LPHN1	LOC729806	MBOAT2	MARS2	TWSG1	TYMP
LOC100130707	LOC100131672	LRBA	LOC729898	MBTPS1	MBP	UBAP2L	UBE2L6
LOC100130764	LOC100131713	LRFN3	LOC731308	MCM3APAS	MED21	UBE3B	UNC93B1
LOC100131096	LOC100132510	LRIG1	LOC731751	MCTP2	MGC21881	UBE4B	USP18
LOC100131452	LOC100132742	LUZP1	LRRC40	METAP1	MORC2	UHRF2	ZFP37
LOC100131718	LOC100132901	MAP3K7IP1	LYPLA1	MGC52498	MRPS25	USP9X	ZNF589
LOC100131835	LOC100133875	MAP3K8	LYSMD3	MIS12	MS4A1	WBP2	ZNF805
LOC100131850	LOC127295	MAPK8IP3	MAD2L1	MLKL	MSH2	WNK1	ZNF398
LOC100131989	LOC147727	MBD3	MCTS1	MRI1	MTF2	YPEL3	CCNG2
LOC100132323	LOC25845	MCTP1	MGC40489	MRPL45	NAP1L1	ZFYVE27	ZMAT3
LOC100132526	LOC283412	MDC1	MGC4677	MRPS10	NLRP12	ZNF281
LOC100132717	LOC286444	ME2	MIR877	MTMR14	NME2	ZNF644
LOC100132761	LOC339352	MED24	MPHOSPH10	MTX1	NUFIP2	ZYG11B
LOC100133129	LOC347292	MGC3020	MRPL3	MTX3	OAF	PPM1A
LOC100133177	LOC387791	MIER2	MUT	MVP	OSBPL1A	TMEM33
LOC100133298	LOC387841	MIR574	MYOM1	MYCBP2	P2RX5
LOC100134053	LOC388339	MLEC	NCBP2	NAIP	PALLD
LOC100134159	LOC388564	MRPL43	NCRNA00152	NBEA	PHACTR2
LOC100134241	LOC389342	MRPL47	NDUFA5	NCF4	PHF14
LOC100134868	LOC390345	MRPL55	NFIC	NFATC2IP	PHLDB3
LOC123688	LOC391833	MS4A2	NIPSNAP3A	NFKBIA	PIGT
LOC163233	LOC400455	MSL3	NNT	PARM1	PIK3CG
LOC283874	LOC400464	MUM1	NOTCH2NL	PDCD2	PKN2
LOC286016	LOC400963	N4BP2L1	NR1D2	PFTK1	PLD3
LOC339843	LOC402112	NAALADL1	NR3C1	PGM2	PLEKHA5
LOC345645	LOC402221	NAGPA	NUDT21	PHC2	PLEKHB2
LOC374443	LOC402694	NAT6	OLA1	PIM3	PMS2L2
LOC389404	LOC439949	NBL1	OSTCL	PLAUR	PNPLA6
LOC389765	LOC440055	NBPF14	OTUD1	PLCXD1	PPTC7
LOC390414	LOC440737	NCOA5	PAPSS1	POLG2	PRPF39
LOC391169	LOC440927	NCR3	PCDHGB6	PRKCH	PTPRC
LOC391334	LOC441013	NCRNA00092	PDE7A	PRKCQ	PTPRE
LOC400446	LOC441246	NEIL2	PDF	PSG3	RAD21
LOC401252	LOC442064	NLRP7	PDIA3P	PSG9	RANGRF
LOC401623	LOC642357	NUDT16L1	PGGT1B	PTPLB	RHOQ
LOC440157	LOC642741	NUMA1	PHKB	PURA	RNASEH2B
LOC440280	LOC642755	OMA1	PI4K2B	PYCARD	RNASEN
LOC440776	LOC643031	P2RY8	PIK3AP1	RAB20	RPL23AP13
LOC442153	LOC643531	P4HB	PION	RAB24	RPL29P2
LOC442582	LOC644464	P76	PMM2	RAB33B	RPS10P3
LOC641989	LOC645173	PA2G4	POLR2E	RAB3IP	RYBP
LOC642017	LOC645233	PARP8	PPFIA1	RAG1AP1	SCARNA22
LOC642118	LOC645515	PDCD10	PPHLN1	RALA	SCN3A
LOC642299	LOC646034	PELP1	PPIB	RBBP4	SEPT7
LOC642393	LOC646294	PEX14	PPIG	RBM17	SERINC1
LOC642458	LOC646630	PFKL	PPP1CB	RGL4	SERINC3
LOC642502	LOC646688	PGAM1	PPP1R15B	RIPK3	SFRS11
LOC642974	LOC646766	PGAM4	PPP2R5C	RNU5A	SFRS12
LOC643187	LOC646836	PGLS	PRIM2	RNU6-1	SH3BGRL3
LOC643272	LOC646942	PIP5K1C	PSIP1	RORA	SLC39A11
LOC643433	LOC647030	PLEKHB1	PSMC4	RRP1B	SLC7A3
LOC643550	LOC647276	PNKP	PSMC6	RUNX3	SNORD58B
LOC643882	LOC648733	PNPLA2	RAB11FIP5	S100A6	SNORD73A
LOC644029	LOC649447	POGK	RAB37	SAMD8	SNURF
LOC644577	LOC649821	POLDIP3	RABGEF1	SBK1	SP1
LOC644642	LOC652750	POLR2L	RANBP9	SDAD1	SUV420H1
LOC644799	LOC652837	POM121C	RAP1B	SEPT11	SVIL
LOC644852	LOC653162	PPP1R13B	RBBP5	SERPINA1	TMCC3
LOC644931	LOC653737	PPP2R1A	RBM39	SET	TMEM38B
LOC645452	LOC728031	PPP2R5D	RFK	SH2B2	TPM4
LOC645489	LOC728128	PPP4R2	RIOK1	SKP2	TPP2
LOC646491	LOC728428	PRDM4	SCARNA16	SLC2A14	TRAT1
LOC646841	LOC728576	PRPF8	SEC23A	SLC38A1	TRIM9
LOC646897	LOC728820	PRR13	SELT	SMARCC1	TSEN15
LOC646996	LOC728953	PRR7	SEPT6	SOCS3	UGCGL1
LOC647086	LOC729279	PTBP1	SETD6	SP4	UNKL
LOC647654	LOC729402	PTDSS2	SF3B14	SPOCK2	UQCRH
LOC648059	LOC729409	PTMS	SFRS3	SRP72	USP33
LOC648705	LOC729679	PTPN7	SIAH1	ST6GAL1	WAS
LOC648921	LOC729789	RAD23A	SLC45A3	STARD7	ZFAND1
LOC649088	LOC729985	RASSF6	SLC9A4	SURF6	ZFHX3
LOC649456	LOC730029	RAVER1	SMC5	TARP	ZNF256
LOC650898	LOC730187	RBM12B	SNHG10	TCL1A	ZNF319
LOC651316	LOC730246	RFNG	SNHG8	TIMELESS	ZNF567
LOC652274	LOC731096	RGPD1	SNRPE	TIMP2	ZNF641
LOC653086	LOC731365	RHOF	SNX14	TLK1
LOC653489	LPAR5	RHOT1	SPCS2	TLR10
LOC653559	LRRC16A	RNF26	SS18	TMEM209
LOC653596	LSP1	RNMT	SSB	TNFRSF9
LOC653829	LYRM4	RNPEPL1	SUMO1	TOP1P1
LOC653884	LYRM7	RNU12	SUMO1P3	TOP2B
LOC653888	MAGEE1	RNY3	SYF2	TOX
LOC727962	MAL	RPP40	SYNE1	TRIM52
LOC728105	MAN1C1	RPS6KA1	SYTL3	TRIOBP
LOC728207	MARCKSL1	RPS6KA4	TAF1D	TSHZ1
LOC728310	MDH2	RPUSD1	TAF8	TTC3
LOC728602	MEF2A	RSAD1	TANK	TUBA1A
LOC728755	MFNG	RUNX1	TBC1D10B	TUBA3E
LOC729236	MGC87895	SAC3D1	TCEB2	UPF3A
LOC729739	MIR1974	SAMSN1	THEX1	USP10
LOC730060	MMGT1	SBF1	TIAL1	USP14
LOC730202	MOAP1	SEC13	TMF1	VAV3
LOC730534	MPDU1	SEC24A	TMSB4X	WBP11
LOC730924	MRPS15	SEMA4F	TNFSF12	WDFY3
LOC730990	MRPS27	SEPN1	TOB1	WDR75
LOC730993	MSX2P1	SF3A2	TP53BP2	WRNIP1
LOC731789	MTCP1	SH3GLB2	TPRKB	XAF1
LRRC14	NDUFAF3	SIN3A	TRA1P2	XRN2
MAFF	NDUFB11	SLC7A1	TRAPPC9	ZBED4
MAGED4B	NELL2	SMAD3	TRIM16L	ZBTB4
Magmas	NENF	SMARCA5	TRIM4	ZCCHC14
MAPBPIP	NFKBIB	SMARCB1	UBE2V1	ZMYND11
MCART1	NFX1	SNORD76	UGP2	ZNF430
MCHR2	NHP2	SNX17	USH1G	ZNF438
MGAT4A	NIP7	SNX20	VDAC2	ZNF529
MGC10997	NLRC5	SORBS3	VEZT	ZNF609
MGC12760	NMT2	SRPK2	XRCC4	ZNF828
MGC26356	NOG	ST6GALNAC6	YOD1	ZNF831
MIR1299	NT5DC3	STRN4	ZC3H4	ZNF91
MIR142	NUCB2	TAF9	ZCCHC10
MIR2116	OGFOD1	TAGAP	ZFYVE19
MLL5	ORC5L	TATDN2	ZNF37A
MNT	PABPC4	TBC1D9B	ZNF471
MOBKL2C	PAK1IP1	TESK1	ZNF638
MPP6	PAQR8	TIAF1	ZNF92
MRP63	PDCL	TLE2
MS4A3	PDZD4	TMC6
MTUS1	PEBP1	TMEM109
N4BP2	PECI	TMEM165
NAGLU	PEMT	TMEM185A
NDFIP1	PEX11B	TMEM189-UBE2V1
NDUFA4	PFKFB3	TMEM219
NDUFC1	PGM2L1	TMUB1
NFIX	PHB	TNFAIP8L1
NFYB	PIK3IP1	TNFRSF21
NLRP1	PIN1	TOP1MT
NLRP8	PKIA	TRIM26
NOX4	PKM2	TRRAP
NPAL3	PLAG1	TSPAN14
NT5C	PLCG1	TUFM
NT5DC1	PLD6	TUT1
NUBPL	PLEKHF1	UBA3
OPN1SW	POLR1D	UBE1C
OR1J1	POLR1E	UNC84B
OR2A42	POLR2G	URG4
PABPC1	POLR3GL	USP5
PAFAH2	POTEE	VAC14
PATE2	PPM1K	VAMP2
PCDHB9	PPP1R2	VEGFB
PDE12	PRAGMIN	VPS28
PDK1	PRKCA	VPS52
PHAX	PRRT3	WDR1
PIAS2	PRUNE	WDR48
PIGX	PSRC1	WWP1
PIK3R1	PTK2B	XAB2
PIM2	QARS	XRCC6
PIP4K2A	RAB33A	XRN1
PKN1	RAPGEF6	ZBTB16
PLA2G2D	RNF144	ZBTB3
PLAA	RNF144A	ZBTB42
PLIN2	RPL10A	ZBTB9
PLXNA4	RPL17	ZFPM1
PMS2L1	RPL22	ZNF131
PMS2L5	RPL23A	ZNF142
PNPT1	RPL36	ZNF282
PNRC2	RPL37	ZNF337
POLK	RPL4	ZNF33B
POLR2J4	RPL5	ZNF444
PPAPDC2	RPL8	ZNF502
PPP2R2B	RPS14	ZNF524
PPP2R3A	RPS15	ZNF526
PRKAG1	RPS18	ZNF580
PRKY	RPS29	ZNF615
PRMT2	RPS3	ZSCAN2
PRRG4	RPS4X
PTGR2	RPS5
PTP4A2	RPS8
PTPLAD1	RSL1D1
PTPLAD2	RTBDN
PTPN2	RTKN2
PUM1	RWDD1
QRICH1	SAP30L
RAB22A	SEC62
RAD23B	SELM
RAD51	SELPLG
RALGPS2	SEPT9
RALY	SEPW1
RASA2	SERPINE2
RAX2	SFRS2B
RAXL1	SH3PXD2A
RBM11	SIGLEC7
RBM3	SKAP1
RBM4	SLC25A23
RCN2	SLC25A3
RFX4	SMPD1
RGMA	SMYD2
RHBDD2	SMYD3
RHBDF2	SNHG9
RN7SK	SNORD13
RNASE3	SNORD16
RNF213	SNORD18C
ROCK2	SNORD21
RPL26L1	SPNS3
RPL6	SSR4
RPL7L1	ST6GALNAC4
RPS6	STAT4
RPS6P1	SULT1A2
RRBP1	SULT1A3
RUFY2	SUMF2
S100A10	TBCA
SCAMP1	TCEA2
SDHC	TCEAL8
SEMA3E	TCP1
SFRS12IP1	TECR
SH3GL1	TGIF1
SH3KBP1	TIMM22
SIDT2	TMEM107
SKA2	TMEM116
SLA2	TMEM203
SLC15A2	TMEM50B
SLC25A28	TNFRSF25
SLC35C1	TNFSF13
SLC35E1	TOMM7
SLC39A8	TOX2
SLC4A5	TROVE2
SLC5A8	TRPC4AP
SLC7A6	TSGA14
SNAPC1	TSPAN5
SNX7	TSTD1
SPC24	TTC39C
SPCS1	TTC4
SPTLC1	TYSND1
SRFBP1	USP47
SRM	UXT
SRP19	VHL
SSBP3	VSIG1
STAR	WASH2P
STX10	WDR82
SYAP1	WWP2
SYNC1	XYLT2
TAGLN	ZBED3
TAP1	ZDHHC9
TBC1D22A	ZFP14
TBC1D7	ZFP30
TCFL5	ZNF160
TFIP11	ZNF204
TLR5	ZNF252
TMEM106A	ZNF260
TMEM137	ZNF329
TMEM156	ZNF395
TMEM191A	ZNF518B
TMEM204	ZNF540
TMTC4	ZNF544
TNFSF14	ZNF559
TNFSF15	ZNF683
TOMM20	ZNF773
TRIM13	ZNF792
TSEN54
TTN
TUBB4Q
U2AF1
UBE2E3
UBXN7
UCRC
UHMK1
USP48
USP53
VPS41
WDR23
WDR74
WRB
YES1
YIF1A
ZC3H5
ZDHHC4
ZNF121
ZNF136
ZNF223
ZNF24
ZNF274
ZNF320
ZNF345
ZNF420
ZNF441
ZNF626
ZNF669
ZNF716
ZNF738
ZNF818
ZNF860
ZNF93
ZRSR2
CLOCK
MTRNR2L1
TRDV3
LRRC8B

## Sheet: Genes in Module Classifier
ABAT
ABCC3
ABHD14A
ACOT4
ACSM3
ACYP2
ADCY7
AFF1
AGAP8
AHCTF1
AHCY
AHNAK
AK3
AK5
AKR1C3
AKR7A3
AKT1
AKTIP
ALDH5A1
ALKBH7
ALOX12
ANGPT1
ANKRD12
ANKRD41
ANP32A
ANP32C
ANXA11
ANXA2P1
ANXA2P3
AP1G1
AP2S1
APOA1BP
AQP12A
ARAP3
ARHGAP10
ARHGAP21
ARHGAP30
ARID1A
ARID4A
ARRDC2
ASAP1
ATG2A
ATG3
ATP2B4
ATP5A1
ATP5E
ATPGD1
ATXN7L3B
BATF
BCL2L11
BCORL1
BIN2
BMPR2
BRD3
BRD7P2
BRPF3
BRWD2
BTBD2
C10orf104
C10orf35
C10orf47
C10orf58
C11orf1
C11orf2
C11orf82
C12orf29
C12orf65
C13orf15
C13orf18
C14orf43
C15orf26
C15orf52
C15orf57
C16orf30
C16orf53
C16orf68
C17orf45
C18orf10
C18orf32
C19orf39
C19orf53
C1orf151
C1QBP
C20orf100
C20orf196
C20orf30
C21orf33
C21orf7
C22orf29
C22orf32
C2orf15
C2orf89
C3orf10
C5orf4
C5orf53
C6orf160
C6orf211
C6orf48
C7orf41
C8orf33
CA2
CA5B
CABIN1
CABP5
CAMK1D
CAMSAP1L1
CBL
CBR3
CCDC23
CCDC25
CCDC28B
CCDC65
CCDC72
CCDC90A
CCDC97
CCNK
CCT3
CD27
CD300LB
CD320
CD3D
CD40LG
CD6
CD74
CD99
CDC14B
CDC2L6
CDC42SE2
CENPL
CENTB2
CEP63
CEPT1
CHES1
CHPF2
CKS2
CLASP1
CLEC12A
CLEC12B
CLEC7A
CMTM4
CNN3
CNNM3
COMMD7
COX11
COX7A2L
CPEB3
CRBN
CREBBP
CRIP1
CRIP2
CS
CSNK1A1L
CTDSPL
CTRL
CTSC
CTTN
CUGBP2
CUTA
CUTL1
CWC22
CXCL5
CXCR7
CXorf20
DAB2
DACH1
DAP3
DAPK2
DBI
DBP
DCXR
DDHD2
DDX3X
DECR2
DGCR8
DHRS3
DIAPH1
DIP2B
DKFZp686I15217
DKFZp761P0423
DLEU1
DNHD2
DNM3
DNTT
DPEP2
DSTN
DUSP14
ECT2
EDAR
EEF1B2
EEF1G
EEF2
EFCAB2
EIF2AK1
EIF2S3
EIF3F
EIF3G
EIF3H
EIF3K
EIF3L
ELA1
ELMO1
ELOVL4
ENDOD1
EP300
EPAS1
EPN2
EPOR
ETFB
EVI2B
EXOC8
FAM101B
FAM102A
FAM10A4
FAM120A
FAM126B
FAM134B
FAM19A2
FAM3A
FAM65B
FAM91A2
FBLN1
FBLN2
FBXO32
FCGBP
FCGR2B
FCGR3A
FERMT3
FKBP14
FKBP1A
FLJ10916
FLT3LG
FNBP1
FOXO1
GABARAPL2
GATAD2A
GATAD2B
GATS
GCET2
GDF11
GDI1
GLRX5
GLTSCR2
GNAI2
GNG7
GOLPH3L
GPN1
GPR65
GPX4
GRAP2
GRASP
GRB14
GSTM2
GSTM3
GSTM4
GTF3C6
GUCY1A3
HABP4
HCFC1R1
HCST
HELZ
HERPUD2
HGD
HHEX
HIAT1
HIGD2A
HIST1H2AD
HIST1H2AE
HM13
HNRNPU
HNRPUL1
HOMER2
HOXC6
HPCAL4
HSH2D
HSPA1L
HSPB1
IFFO2
IGF2R
IL23A
IL27RA
ILK
ILVBL
IMPA2
ING3
INPP4B
IP6K1
IRF2
IRS2
IRX3
ITGAX
ITGB5
ITM2B
JAM3
JARID2
KBTBD11
KDM1B
KDM5B
KDM6B
KIAA0247
KIAA0355
KIAA1033
KIAA1430
KIAA2026
KIDINS220
KLF5
KLRB1
KRT73
KRT8P9
LAPTM4A
LAPTM4B
LAPTM5
LARGE
LARP1
LASP1
LCK
LDHB
LDOC1L
LGSN
LIAS
LILRA1
LILRA3
LIMS1
LMNB2
LOC100124692
LOC100127993
LOC100128252
LOC100128269
LOC100128533
LOC100128627
LOC100128731
LOC100129424
LOC100130932
LOC100130980
LOC100131662
LOC100131672
LOC100131713
LOC100131810
LOC100132493
LOC100132510
LOC100132742
LOC100132888
LOC100132901
LOC100133770
LOC100133803
LOC100133875
LOC100134291
LOC127295
LOC147727
LOC25845
LOC283412
LOC286444
LOC339352
LOC347292
LOC387791
LOC387841
LOC388339
LOC388564
LOC389053
LOC389286
LOC389342
LOC390345
LOC391769
LOC391833
LOC392288
LOC400455
LOC400464
LOC400948
LOC400963
LOC402112
LOC402221
LOC402694
LOC439949
LOC440055
LOC440093
LOC440525
LOC440737
LOC440926
LOC440927
LOC441013
LOC441246
LOC442064
LOC442319
LOC641992
LOC642035
LOC642357
LOC642567
LOC642741
LOC642755
LOC643031
LOC643531
LOC643896
LOC644464
LOC644482
LOC644745
LOC644877
LOC644964
LOC645052
LOC645173
LOC645233
LOC645515
LOC646034
LOC646294
LOC646630
LOC646688
LOC646766
LOC646836
LOC646942
LOC647030
LOC647276
LOC647460
LOC647908
LOC648733
LOC648863
LOC649260
LOC649447
LOC649821
LOC650638
LOC652750
LOC652837
LOC653162
LOC653737
LOC728031
LOC728128
LOC728428
LOC728576
LOC728820
LOC728953
LOC729200
LOC729279
LOC729402
LOC729409
LOC729679
LOC729779
LOC729789
LOC729985
LOC730029
LOC730187
LOC730246
LOC731096
LOC731365
LOC732229
LOC92249
LOC92755
LPAR5
LPIN2
LRRC16A
LSP1
LYRM4
LYRM7
MAGEE1
MAL
MAN1C1
MAP1LC3A
MAP2K4
MAPKAPK2
MAPRE3
MARCKSL1
MAST3
MBD2
MDH2
MED31
MEF2A
MEIS1
METTL9
MFNG
MGC13005
MGC42367
MGC87895
MID1IP1
MIR1974
MMGT1
MOAP1
MPDU1
MPL
MRPL17
MRPL41
MRPS15
MRPS27
MRRF
MSRB3
MSX2P1
MTCP1
MTMR3
MYH9
MYO9B
MYST3
NAT8B
NCALD
NCF1B
NCKAP1L
NCOR2
NCRNA00081
NCRNA00085
NDE1
NDUFAF3
NDUFB11
NDUFS1
NELL2
NENF
NFKBIB
NFX1
NHP2
NIP7
NLRC5
NLRX1
NMT2
NOG
NR4A2
NT5DC3
NUAK2
NUCB2
NUDCD2
ODC1
OGFOD1
OR7E156P
ORC5L
OSBPL8
P704P
PABPC4
PACS1
PAK1IP1
PAK2
PAN3
PAPSS2
PAQR8
PARP15
PCBP2
PDCL
PDE5A
PDPK1
PDZD4
PEBP1
PECI
PELI2
PEMT
PEX11B
PFKFB3
PGM2L1
PHB
PHF2
PIK3CD
PIK3IP1
PIN1
PJA2
PKIA
PKM2
PLAG1
PLAGL1
PLCB2
PLCG1
PLD6
PLEKHF1
POLR1D
POLR1E
POLR2A
POLR2G
POLR3GL
POTE2
POTEE
PPM1A
PPM1K
PPP1R2
PRAGMIN
PRKCA
PRKCB
PRKCB1
PRRT3
PRUNE
PSMB7
PSRC1
PTGS1
PTK2B
PVALB
QARS
RAB11FIP1
RAB11FIP4
RAB27B
RAB33A
RAB43
RAPGEF2
RAPGEF6
RASSF2
RASSF5
RBMS1
RFX1
RGS18
RNF103
RNF144
RNF144A
ROCK1
ROD1
RPAP3
RPL10A
RPL17
RPL22
RPL23A
RPL36
RPL37
RPL4
RPL5
RPL8
RPS14
RPS15
RPS18
RPS29
RPS3
RPS4X
RPS5
RPS7
RPS8
RSL1D1
RTBDN
RTKN2
RWDD1
RXRA
SAP30L
SDHAF1
SDPR
SEC16A
SEC62
SELM
SELPLG
SEMA4D
SENP6
SEPT14
SEPT9
SEPW1
SERPINB8
SERPINE2
SETD1A
SETD1B
SF3A1
SFRS2B
SGK
SGOL2
SH3BP2
SH3PXD2A
SIGLEC7
SIK3
SIL1
SKAP1
SLC24A3
SLC25A19
SLC25A23
SLC25A3
SLC44A2
SLC8A3
SMPD1
SMYD2
SMYD3
SNHG9
SNORA28
SNORD13
SNORD16
SNORD18C
SNORD21
SOCS4
SP2
SPC25
SPG21
SPI1
SPNS3
SREBF1
SRRM2
SSR4
ST6GALNAC4
STAT4
STK40
STX7
SULT1A2
SULT1A3
SUMF2
SYTL2
TACC1
TADA1L
TAF4
TAL1
TBCA
TBL1X
TCEA2
TCEA3
TCEAL4
TCEAL8
TCEB1
TCP1
TECR
TFEC
TGFBR2
TGIF1
THOC4
TIMM22
TLN1
TMCC1
TMEM107
TMEM116
TMEM126B
TMEM203
TMEM33
TMEM50B
TMX4
TNFRSF25
TNFSF13
TOMM7
TOP1P2
TOX2
TP53INP2
TRAPPC4
TROVE2
TRPC4AP
TSC22D1
TSC22D3
TSGA14
TSPAN5
TSTD1
TTC39C
TTC4
TTRAP
TWSG1
TYSND1
UBAP2L
UBE2D1
UBE2W
UBE3B
UBE4B
UHRF2
USP47
USP6
USP9X
UXT
VHL
VSIG1
VWF
WASH2P
WBP2
WDR82
WNK1
WWP2
XYLT2
YIPF4
YPEL3
ZBED3
ZDHHC9
ZFP14
ZFP30
ZFYVE27
ZNF160
ZNF185
ZNF204
ZNF252
ZNF260
ZNF281
ZNF329
ZNF395
ZNF518B
ZNF540
ZNF544
ZNF559
ZNF644
ZNF683
ZNF773
ZNF792
ZYG11B

## Sheet: Enrichment Discovery DE genes 
Process Networks (Metacore) enrichment of the Discovery DE genes
		Differentially Expressed_genelist
	#	Networks	pValue	Ratio
	1	Apoptosis_Apoptotic nucleus	3.995e-07	43/159
	2	Apoptosis_Death Domain receptors & caspases in apoptosis	3.87e-06	34/123
	3	Immune response_Phagosome in antigen presentation	1.092e-05	54/243
	4	Immune response_Phagocytosis	1.575e-05	50/222
	5	Immune response_TCR signaling	6.833e-05	40/174
	6	Translation_Translation initiation	0.0001008	39/171
	7	Inflammation_Interferon signaling	0.0001348	28/110
	8	Apoptosis_Anti-apoptosis mediated by external signals via NF-kB	0.0001594	28/111
	9	Cell adhesion_Leucocyte chemotaxis	0.0001665	44/205
	10	Inflammation_IFN-gamma signaling	0.0007958	26/110
	11	Transcription_mRNA processing	0.001073	34/160
	12	Signal Transduction_TGF-beta, GDF and Activin signaling	0.001087	33/154
	13	Cell cycle_Mitosis	0.001131	37/179
	14	Cytoskeleton_Actin filaments	0.001594	36/176
	15	Cell adhesion_Platelet aggregation	0.001712	33/158
	16	Reproduction_Progesterone signaling	0.002628	41/213
	17	Proteolysis_Proteolysis in cell cycle and apoptosis	0.002643	27/125
	18	Reproduction_FSH-beta signaling pathway	0.004071	32/160
	19	Cell cycle_G2-M	0.004447	39/206
	20	Signal Transduction_Cholecystokinin signaling	0.004992	23/106
	21	Cytoskeleton_Regulation of cytoskeleton rearrangement	0.005794	35/183
	22	Development_Regulation of angiogenesis	0.006107	41/223
	23	Development_Melanocyte development and pigmentation	0.006797	13/50
	24	Inflammation_IL-4 signaling	0.00698	24/115
	25	Proteolysis_Ubiquitin-proteasomal proteolysis	0.007205	32/166
	26	Inflammation_Neutrophil activation	0.007515	40/219
		Differentially Expressed_genelist
	#	Map folders	pValue	Ratio
	1	Immune system response	6.721e-24	169/1000
	2	Inflammatory response	2.796e-14	122/775
	3	DNA-damage response	1.658e-13	71/354
	4	Cell cycle and its regulation	1.058e-12	89/516
	5	Apoptosis	3.71e-12	135/953
	6	Cell differentiation	5.519e-10	127/940
	7	Tissue remodeling and wound repair	1.107e-09	86/557
	8	Protein synthesis	2.932e-09	56/306
	9	Vascular development (Angiogenesis)	1.878e-08	81/543
	10	Cystic fibrosis disease	3.695e-08	90/636
	11	Calcium signaling	1.953e-07	70/469
	12	Protein degradation	2.554e-07	47/269
	13	Mitogenic signaling	7.868e-07	78/562
	14	Obesity	0.0001603	33/211
	15	Myogenesis regulation	0.0001736	19/95
	16	Transcription regulation	0.0004464	15/71
	17	Hypoxia response regulation	0.0004639	1943-11-01
	18	Hematopoiesis	0.002301	40/313
	19	Cardiac Hypertrophy	0.004615	31/236
	20	Blood clotting	0.009879	34/279

## Sheet: Discovery Classification Prob
SujectID	Dx	Dx_subgroups	Prob(ASD)	Prediction	Success at 0.5 threshold
Subject1	ASD	ASD	0.461579	Control	0
Subject2	ASD	ASD	0.665927	ASD	1
Subject3	ASD	ASD	0.619496	ASD	1
Subject4	Control	TD	0.462355	Control	1
Subject5	Control	TD	0.387846	Control	1
Subject6	ASD	ASD	0.450177	Control	0
Subject7	Control	TD	0.633138	ASD	0
Subject8	ASD	ASD	0.494159	Control	0
Subject9	Control	TD	0.539098	ASD	0
Subject10	ASD	ASD	0.812645	ASD	1
Subject11	ASD	ASD	0.514227	ASD	1
Subject12	ASD	ASD	0.780853	ASD	1
Subject13	ASD	ASD	0.814923	ASD	1
Subject14	Control	TD	0.398175	Control	1
Subject15	Control	TD	0.294917	Control	1
Subject16	Control	TD	0.32884	Control	1
Subject17	ASD	ASD	0.586004	ASD	1
Subject18	Control	TD	0.697759	ASD	0
Subject19	Control	TD	0.481623	Control	1
Subject20	ASD	ASD	0.668221	ASD	1
Subject21	ASD	ASD	0.733378	ASD	1
Subject22	Control	TD	0.725268	ASD	0
Subject23	ASD	ASD	0.380445	Control	0
Subject24	ASD	ASD	0.518429	ASD	1
Subject25	ASD	ASD	0.500465	ASD	1
Subject26	Control	Contrast DD	0.239364	Control	1
Subject27	Control	TD	0.391672	Control	1
Subject28	Control	TD	0.379898	Control	1
Subject29	Control	TD	0.436728	Control	1
Subject30	Control	Contrast DD	0.243055	Control	1
Subject31	Control	TD	0.41119	Control	1
Subject32	ASD	ASD	0.171942	Control	0
Subject33	Control	TD	0.17323	Control	1
Subject34	ASD	ASD	0.684222	ASD	1
Subject35	Control	TD	0.533521	ASD	0
Subject36	Control	TD	0.059887	Control	1
Subject37	Control	TD	0.459591	Control	1
Subject38	Control	TD	0.452672	Control	1
Subject39	Control	Contrast DD	0.321885	Control	1
Subject40	Control	TD	0.42583	Control	1
Subject41	Control	TD	0.17001	Control	1
Subject42	Control	TD	0.204355	Control	1
Subject43	ASD	ASD	0.322469	Control	0
Subject44	ASD	ASD	0.515263	ASD	1
Subject45	Control	TD	0.271506	Control	1
Subject46	Control	TD	0.3002	Control	1
Subject47	Control	TD	0.48815	Control	1
Subject48	Control	TD	0.339461	Control	1
Subject49	Control	Contrast DD	0.0934503	Control	1
Subject50	ASD	ASD	0.645252	ASD	1
Subject51	ASD	ASD	0.679222	ASD	1
Subject52	Control	Contrast DD	0.335358	Control	1
Subject53	ASD	ASD	0.759889	ASD	1
Subject54	Control	TD	0.696046	ASD	0
Subject55	Control	TD	0.3403	Control	1
Subject56	ASD	ASD	0.567543	ASD	1
Subject57	ASD	ASD	0.470456	Control	0
Subject58	ASD	ASD	0.7122	ASD	1
Subject59	Control	TD	0.52248	ASD	0
Subject60	Control	TD	0.539282	ASD	0
Subject61	ASD	ASD	0.830305	ASD	1
Subject62	Control	TD	0.349261	Control	1
Subject63	ASD	ASD	0.753919	ASD	1
Subject64	Control	TD	0.253399	Control	1
Subject65	ASD	ASD	0.568317	ASD	1
Subject66	Control	Contrast DD	0.578314	ASD	0
Subject67	ASD	ASD	0.371724	Control	0
Subject68	ASD	ASD	0.763584	ASD	1
Subject69	Control	Contrast DD	0.357089	Control	1
Subject70	Control	Contrast DD	0.549962	ASD	0
Subject71	Control	Contrast DD	0.551568	ASD	0
Subject72	ASD	ASD	0.703393	ASD	1
Subject73	Control	TD	0.413023	Control	1
Subject74	ASD	ASD	0.739068	ASD	1
Subject75	ASD	ASD	0.895316	ASD	1
Subject76	ASD	ASD	0.878586	ASD	1
Subject77	ASD	ASD	0.883159	ASD	1
Subject78	ASD	ASD	0.770428	ASD	1
Subject79	ASD	ASD	0.793466	ASD	1
Subject80	ASD	ASD	0.714033	ASD	1
Subject81	Control	TD	0.50959	ASD	0
Subject82	ASD	ASD	0.867628	ASD	1
Subject83	ASD	ASD	0.8997	ASD	1
Subject84	ASD	ASD	0.868513	ASD	1
Subject85	ASD	ASD	0.810397	ASD	1
Subject86	ASD	ASD	0.762707	ASD	1
Subject87	ASD	ASD	0.844713	ASD	1
Subject88	Control	TD	0.660359	ASD	0
Subject89	ASD	ASD	0.80436	ASD	1
Subject90	ASD	ASD	0.895043	ASD	1
Subject91	ASD	ASD	0.651495	ASD	1
Subject92	ASD	ASD	0.840242	ASD	1
Subject93	ASD	ASD	0.91483	ASD	1
Subject94	ASD	ASD	0.892614	ASD	1
Subject95	ASD	ASD	0.758626	ASD	1
Subject96	Control	TD	0.287328	Control	1
Subject97	Control	TD	0.821079	ASD	0
Subject98	ASD	ASD	0.794691	ASD	1
Subject99	ASD	ASD	0.75202	ASD	1
Subject100	ASD	ASD	0.720635	ASD	1
Subject101	Control	TD	0.457678	Control	1
Subject102	ASD	ASD	0.741792	ASD	1
Subject103	Control	TD	0.736287	ASD	0
Subject104	ASD	ASD	0.725416	ASD	1
Subject105	ASD	ASD	0.806024	ASD	1
Subject106	ASD	ASD	0.723228	ASD	1
Subject107	ASD	ASD	0.821414	ASD	1
Subject108	ASD	ASD	0.910261	ASD	1
Subject109	Control	Contrast DD	0.538541	ASD	0
Subject110	ASD	ASD	0.848396	ASD	1
Subject111	ASD	ASD	0.659365	ASD	1
Subject112	ASD	ASD	0.812877	ASD	1
Subject113	ASD	ASD	0.689222	ASD	1
Subject114	Control	Contrast DD	0.7901	ASD	0
Subject115	ASD	ASD	0.679829	ASD	1
Subject116	ASD	ASD	0.808576	ASD	1
Subject117	ASD	ASD	0.642787	ASD	1
Subject118	ASD	ASD	0.574733	ASD	1
Subject119	ASD	ASD	0.693444	ASD	1
Subject120	ASD	ASD	0.785561	ASD	1
Subject121	ASD	ASD	0.862098	ASD	1
Subject122	ASD	ASD	0.876896	ASD	1
Subject123	ASD	ASD	0.971966	ASD	1
Subject124	Control	Contrast DD	0.452489	Control	1
Subject125	ASD	ASD	0.933692	ASD	1
Subject126	ASD	ASD	0.926102	ASD	1
Subject127	ASD	ASD	0.949296	ASD	1
Subject128	ASD	ASD	0.925537	ASD	1
Subject129	ASD	ASD	0.841756	ASD	1
Subject130	Control	TD	0.619441	ASD	0
Subject131	ASD	ASD	0.658626	ASD	1
Subject132	ASD	ASD	0.639595	ASD	1
Subject133	ASD	ASD	0.892179	ASD	1
Subject134	Control	Contrast DD	0.46903	Control	1
Subject135	Control	TD	0.462801	Control	1
Subject136	ASD	ASD	0.591786	ASD	1
Subject137	ASD	ASD	0.768535	ASD	1
Subject138	ASD	ASD	0.566766	ASD	1
Subject139	ASD	ASD	0.516985	ASD	1
Subject140	ASD	ASD	0.577323	ASD	1
Subject141	ASD	ASD	0.84515	ASD	1
Subject142	Control	Contrast DD	0.824669	ASD	0
					115	142	80.9859

## Sheet: Replication Classification Prob
Sample ID	Dx	Dx_subgroups	Prob (ASD)	Prediction	Success at 0.5 threshold
Subject143	Control	TD	0.553137	ASD	0
Subject144	ASD	ASD	0.41916	Control	0
Subject145	Control	TD	0.319687	Control	1
Subject146	ASD	ASD	0.428846	Control	0
Subject147	ASD	ASD	0.651165	ASD	1
Subject148	Control	TD	0.46321	Control	1
Subject149	ASD	ASD	0.550117	ASD	1
Subject150	Control	TD	0.668115	ASD	0
Subject151	Control	TD	0.38637	Control	1
Subject152	ASD	ASD	0.988583	ASD	1
Subject153	Control	Contrast DD	0.869738	ASD	0
Subject154	ASD	ASD	0.57715	ASD	1
Subject155	Control	TD	0.465395	Control	1
Subject156	ASD	ASD	0.336013	Control	0
Subject157	ASD	ASD	0.491185	Control	0
Subject158	ASD	ASD	0.829116	ASD	1
Subject159	ASD	ASD	0.941354	ASD	1
Subject160	ASD	ASD	0.537322	ASD	1
Subject161	Control	Contrast DD	0.805933	ASD	0
Subject162	ASD	ASD	0.777754	ASD	1
Subject163	ASD	ASD	0.83688	ASD	1
Subject164	ASD	ASD	0.502574	ASD	1
Subject165	ASD	ASD	0.72335	ASD	1
Subject166	Control	TD	0.542875	ASD	0
Subject167	Control	TD	0.788261	ASD	0
Subject168	Control	Contrast DD	0.613877	ASD	0
Subject169	ASD	ASD	0.456687	Control	0
Subject170	ASD	ASD	0.451868	Control	0
Subject171	ASD	ASD	0.715387	ASD	1
Subject172	Control	TD	0.415038	Control	1
Subject173	Control	TD	0.306439	Control	1
Subject174	Control	TD	0.889955	ASD	0
Subject175	ASD	ASD	0.871726	ASD	1
Subject176	Control	Contrast DD	0.456975	Control	1
Subject177	ASD	ASD	0.661321	ASD	1
Subject178	ASD	ASD	0.747098	ASD	1
Subject179	ASD	ASD	0.889843	ASD	1
Subject180	ASD	ASD	0.558502	ASD	1
Subject181	ASD	ASD	0.657926	ASD	1
Subject182	Control	TD	0.683504	ASD	0
Subject183	Control	TD	0.509719	ASD	0
Subject184	Control	TD	0.416499	Control	1
Subject185	ASD	ASD	0.62876	ASD	1
Subject186	Control	TD	0.452338	Control	1
Subject187	ASD	ASD	0.760666	ASD	1
Subject188	ASD	ASD	0.609714	ASD	1
Subject189	ASD	ASD	0.615148	ASD	1
Subject190	ASD	ASD	0.763581	ASD	1
Subject191	ASD	ASD	0.735886	ASD	1
Subject192	ASD	ASD	0.808763	ASD	1
Subject193	ASD	ASD	0.518136	ASD	1
Subject194	ASD	ASD	0.898024	ASD	1
Subject195	ASD	ASD	0.569899	ASD	1
Subject196	Control	TD	0.213966	Control	1
Subject197	ASD	ASD	0.573378	ASD	1
Subject198	ASD	ASD	0.736295	ASD	1
Subject199	ASD	ASD	0.529521	ASD	1
Subject200	ASD	ASD	0.919782	ASD	1
Subject201	ASD	ASD	0.733687	ASD	1
Subject202	Control	TD	0.389659	Control	1
Subject203	Control	TD	0.545441	ASD	0
Subject204	ASD	ASD	0.549589	ASD	1
Subject205	ASD	ASD	0.716747	ASD	1
Subject206	Control	TD	0.383285	Control	1
Subject207	Control	TD	0.400021	Control	1
Subject208	ASD	ASD	0.92664	ASD	1
Subject209	Control	TD	0.524527	ASD	0
Subject210	Control	TD	0.378263	Control	1
Subject211	ASD	ASD	0.735706	ASD	1
Subject212	Control	TD	0.391876	Control	1
Subject213	ASD	ASD	0.649702	ASD	1
Subject214	Control	TD	0.473888	Control	1
Subject215	Control	TD	0.475684	Control	1
					55	73	75.3425

## Sheet: Classifier Metacore analysis
	Process Networks and Pathway Maps (Metacore) enrichment of the four genes modules used as classifier
#	Networks	-log(pValue)	pValue	Ratio
1	Translation_Translation initiation	9.13042	7.406e-10	27/171
2	Inflammation_IFN-gamma signaling	5.79888	1.589e-06	17/110
3	Translation_Elongation-Termination	5.69659	2.011e-06	26/233
4	Translation_Elongation-Termination_test	5.69659	2.011e-06	26/233
5	Cell adhesion_Platelet aggregation	5.32258	4.758e-06	20/158
6	Immune response_Phagocytosis	5.05665	8.777e-06	24/222
7	Cell adhesion_Leucocyte chemotaxis	4.1411	7.226e-05	21/205
8	Signal Transduction_Cholecystokinin signaling	4.08874	8.152e-05	14/106
9	Immune response_TCR signaling	3.67737	0.0002102	18/174
10	Cell cycle_G1-S Growth factor regulation	3.51314	0.0003068	19/195
#	Map folders	-log(pValue)	pValue	Ratio
1	Immune system response	11.6486	2.246e-12	66/1007
2	Protein synthesis	9.64859	2.246e-10	31/306
3	Tissue remodeling and wound repair	8.79942	1.587e-09	42/562
4	Inflammatory response	7.55846	2.764e-08	49/790
5	Vascular development (Angiogenesis)	7.45161	3.535e-08	39/553
6	Calcium signaling	7.29774	5.038e-08	35/469
7	Cell differentiation	6.13042	7.406e-07	52/958
8	Mitogenic signaling	5.81333	1.537e-06	36/564
9	Hypoxia response regulation	5.68466	2.067e-06	9/43
10	Cystic fibrosis disease	5.01678	9.621e-06	37/636

## Sheet: Gene comparison classifiers
Kong et al., signature genes overlapping the DE genes from the discovery subjects											Glatt et al., signature genes overlapping the DE genes from the discovery subjects
ADAM10											ANKRD22
AHNAK											ANXA3
CREBBP											APOBEC3G
IFNAR2											C11orf75
KBTBD11											C3orf38
KIAA0247											CARD17
KIDINS220											FCGR1A
MGAT4A											FCGR1B
PTPRE											GBP1
ROCK1											GBP5
SERINC3											GCH1
ZNF12											IFI16
											IL1RN
											LOC644852
											PARP9
											PLSCR1
											TAP1
											VWF
Kong et al., signature genes overlapping with the four gene modules classifier											Glatt et al., signature genes overlapping with the four gene modules classifier
AHNAK											VWF
CREBBP
KBTBD11
KIAA0247
KIDINS220
ROCK1

## Sheet: Gene comparison postmortem
Voineagu et al., DE genes that overlap with the four gene modules classifier	Directionality of ASD Differential Expression in Voineagu et al., dataset
AKR1C3	Upregulated
AP2S1	Downregulated
ATP5A1	Downregulated
CBL	Upregulated
CCNK	Upregulated
CCT3	Upregulated
CS	Downregulated
DNM3	Downregulated
EEF1G	Upregulated
EIF2AK1	Downregulated
GATAD2A	Upregulated
GNAI2	Upregulated
HSPB1	Upregulated
IGF2R	Upregulated
ITGB5	Upregulated
LAPTM5	Upregulated
LASP1	Upregulated
MAPKAPK2	Upregulated
MARCKSL1	Upregulated
MDH2	Downregulated
MYH9	Upregulated
NFX1	Downregulated
ORC5L	Downregulated
PABPC4	Upregulated
PCBP2	Upregulated
PHB	Upregulated
PIN1	Downregulated
PKM2	Downregulated
POLR2A	Downregulated
PTK2B	Downregulated
RPL36	Upregulated
RPL4	Upregulated
RPS14	Upregulated
RPS15	Upregulated
RPS29	Upregulated
RPS3	Upregulated
RPS4X	Upregulated
SF3A1	Downregulated
SLC25A3	Downregulated
SMYD2	Downregulated
STAT4	Downregulated
TAF4	Upregulated
TLN1	Upregulated
VHL	Upregulated
WBP2	Downregulated
